# Supplementary material for: A catalytic metal-free Ritter reaction to 3-substituted 3-aminooxindoles
Source: Royal Society of Chemistry journal article supplement (doi:10.1039/c2ob25319d), 2012-01-01

# A catalytic metal-free Ritter reaction to 3-substituted 3-aminooxindoles

Feng Zhou, Miao Ding and Jian Zhou\*

(Part II)

*Shanghai Key Laboratory of Green Chemistry and Chemical Processes, Department of Chemistry, East China Normal University, 3663N Zhongshan Road, Shanghai 200062, China.*

| Content     | Page |
|-------------|------|
| NMR spectra | 2-69 |

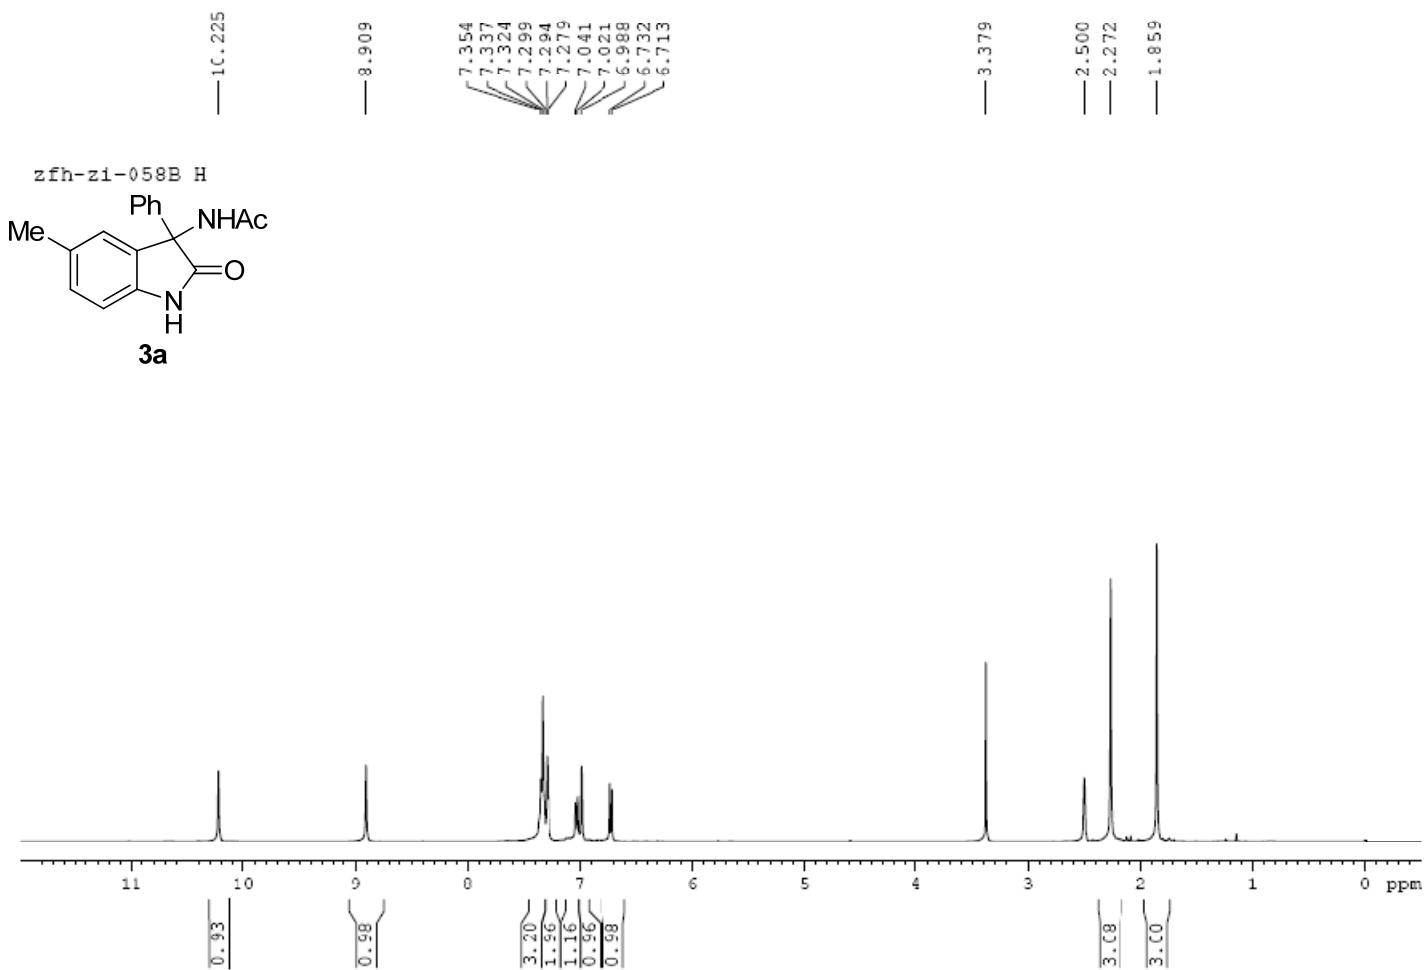

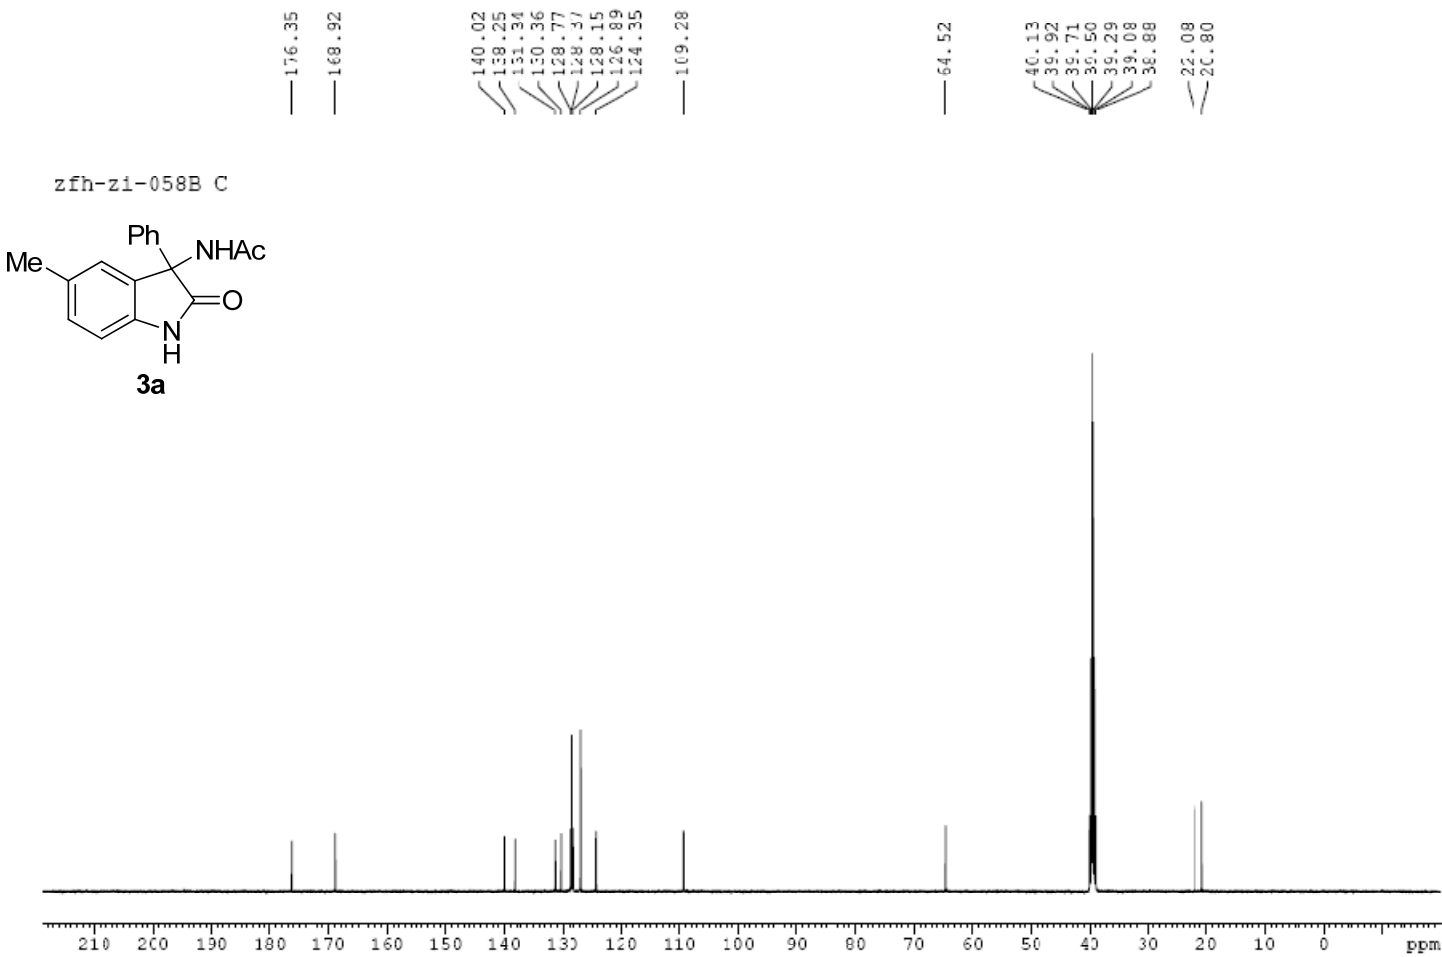

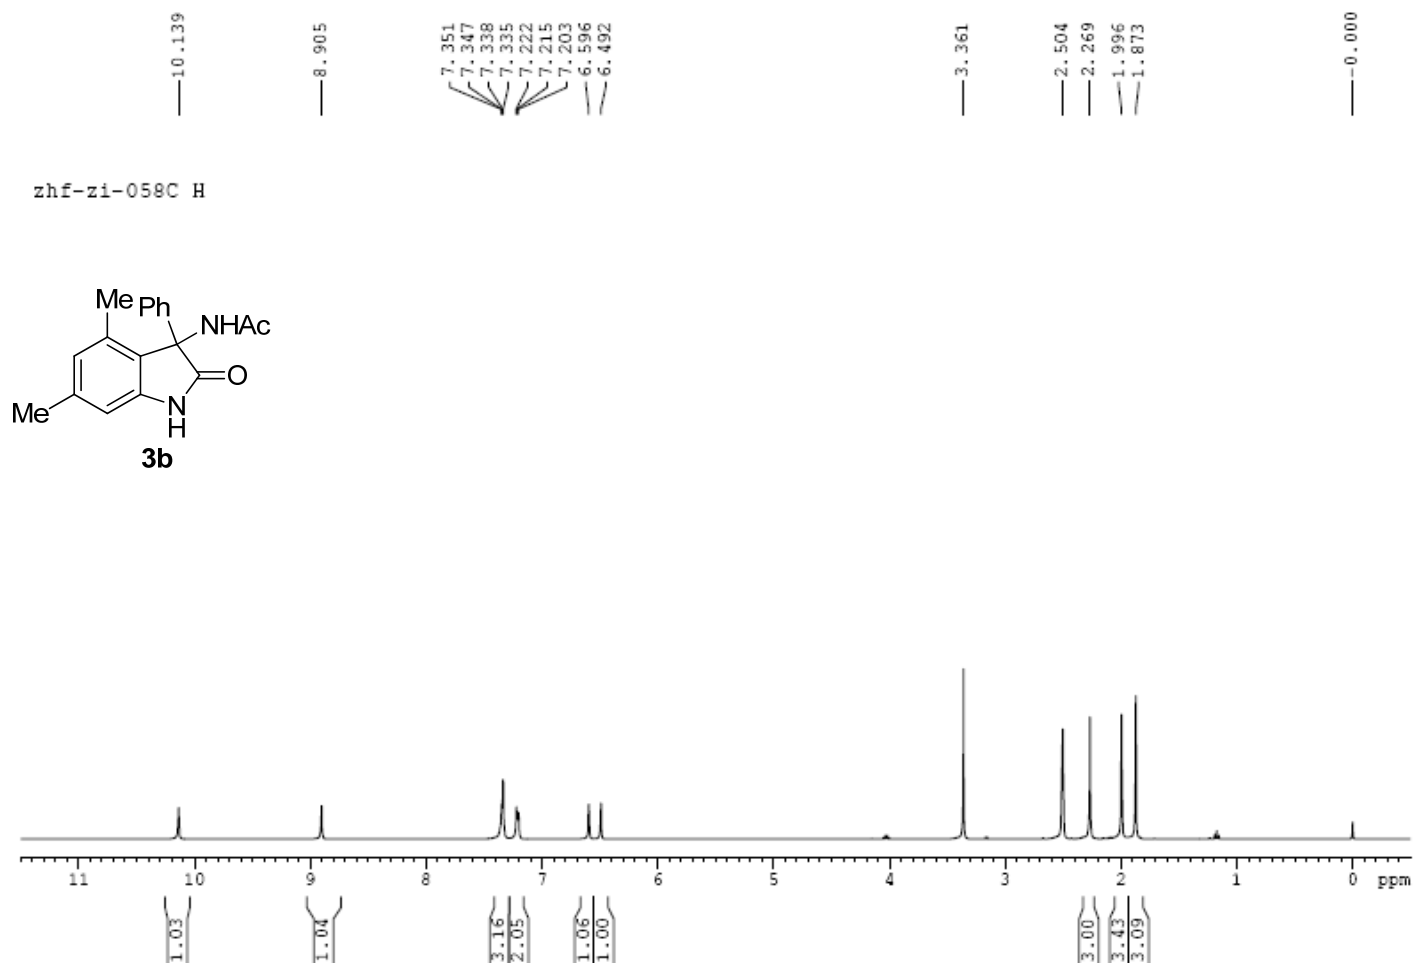

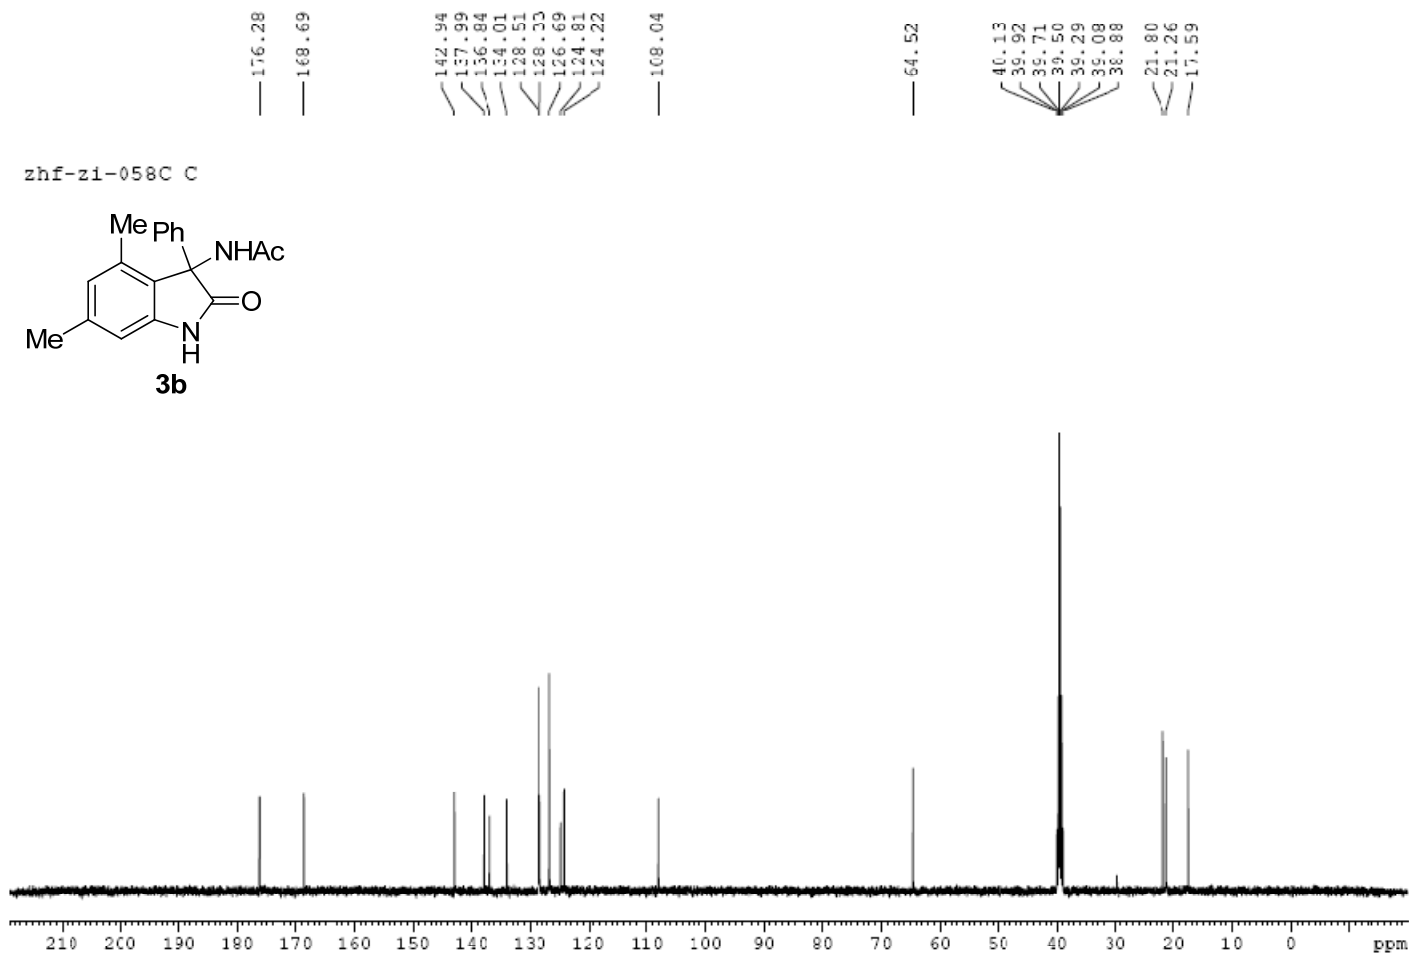

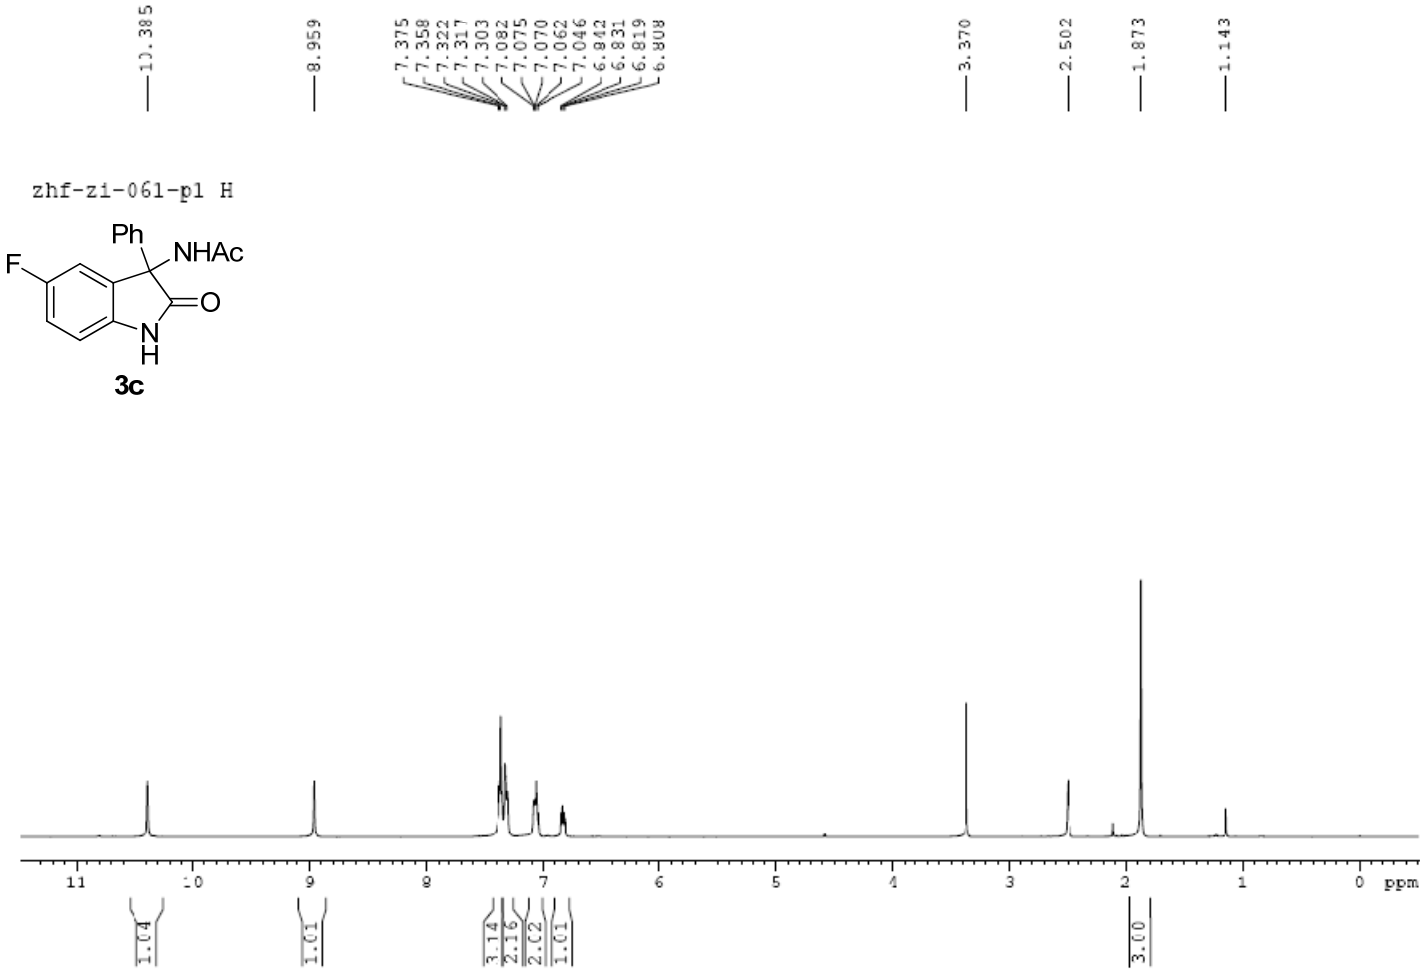

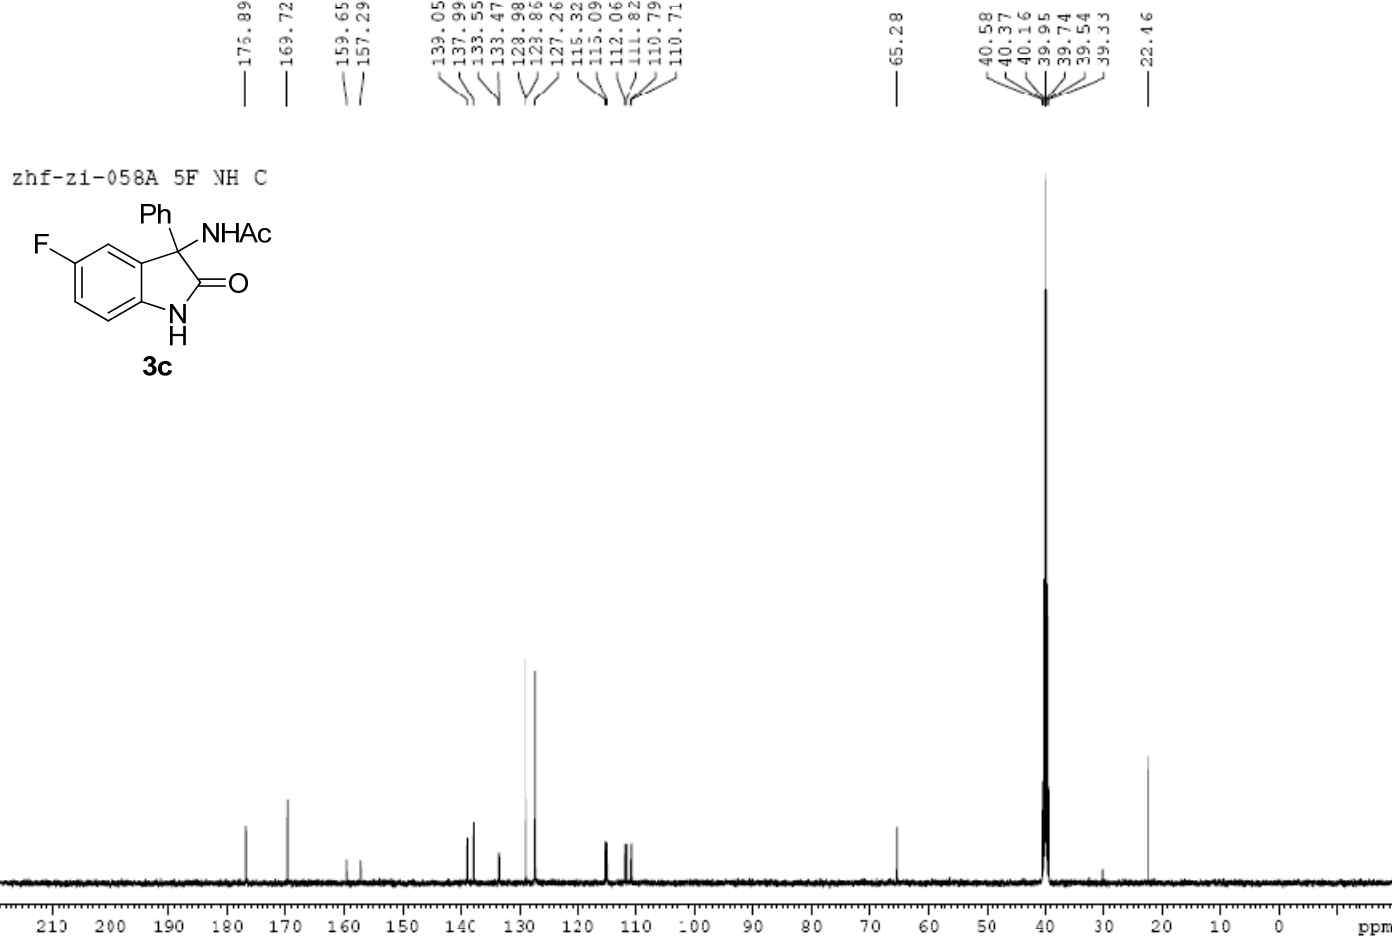

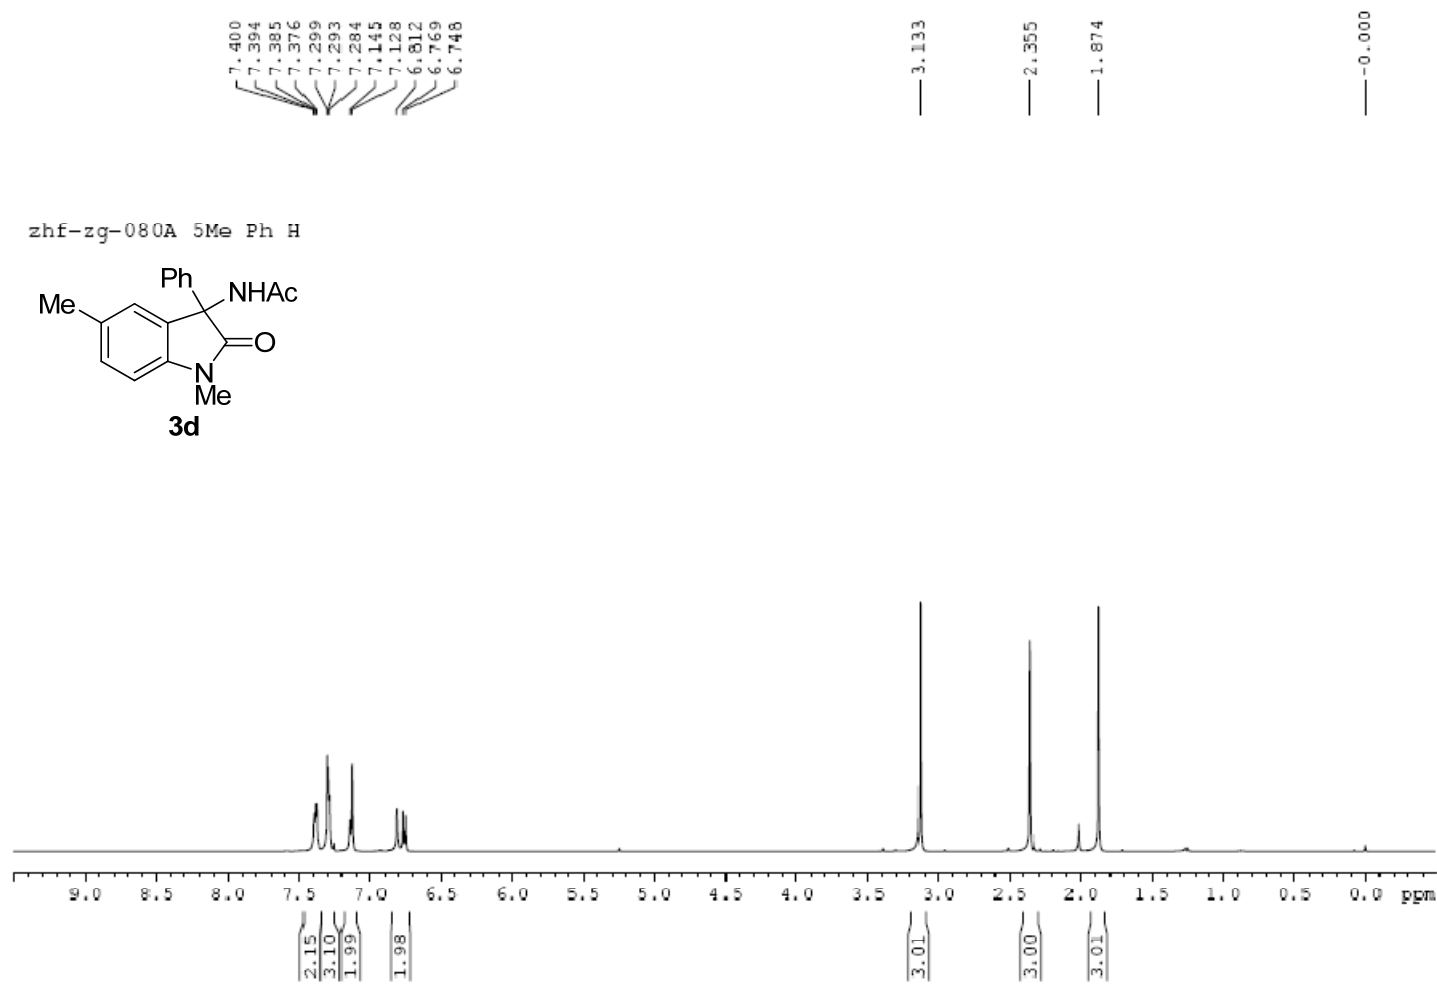



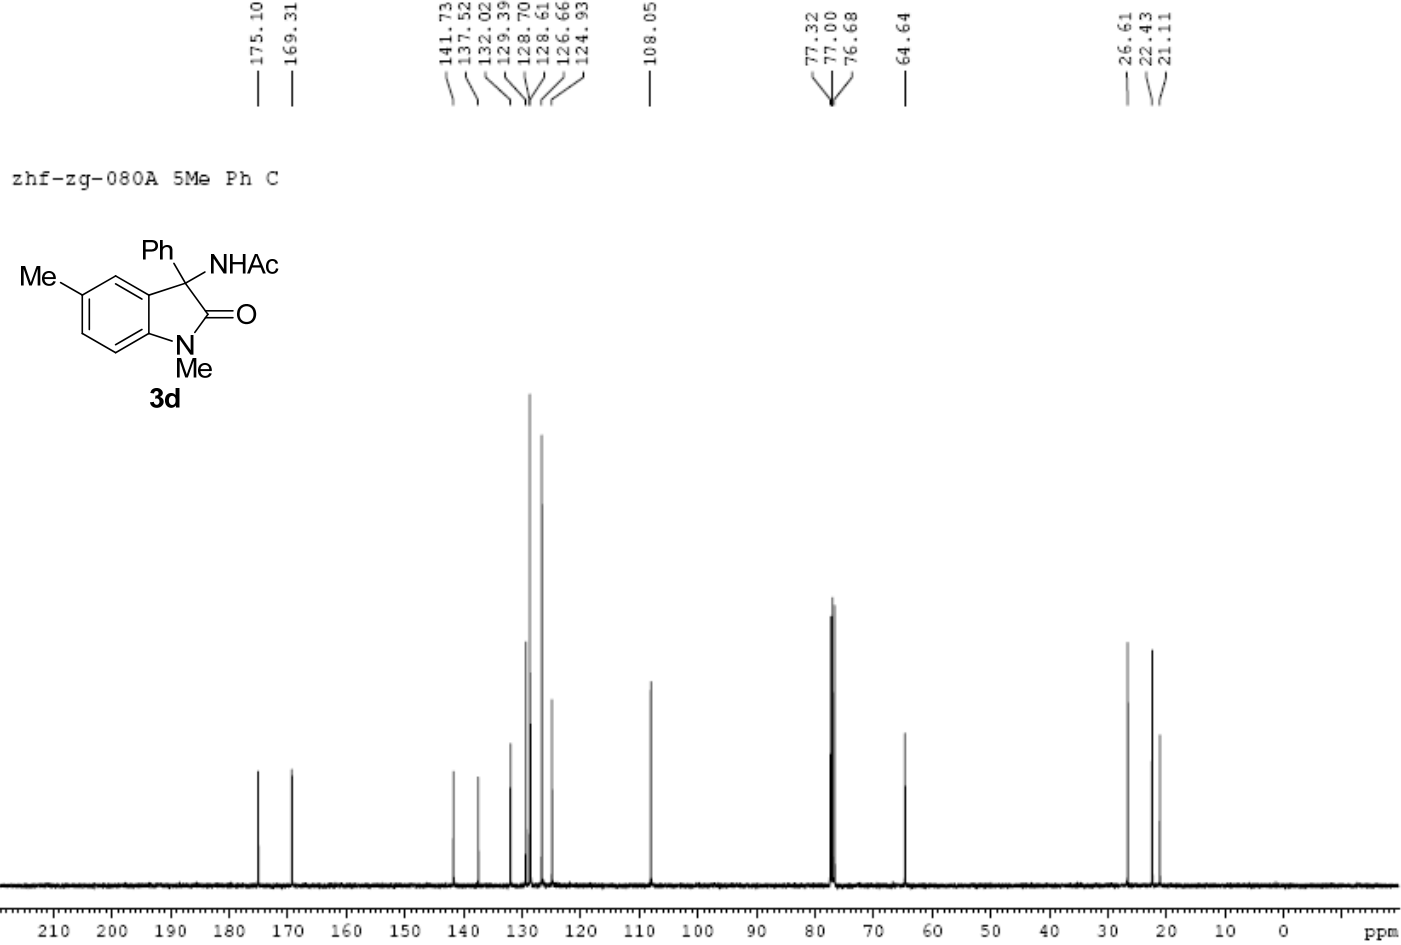

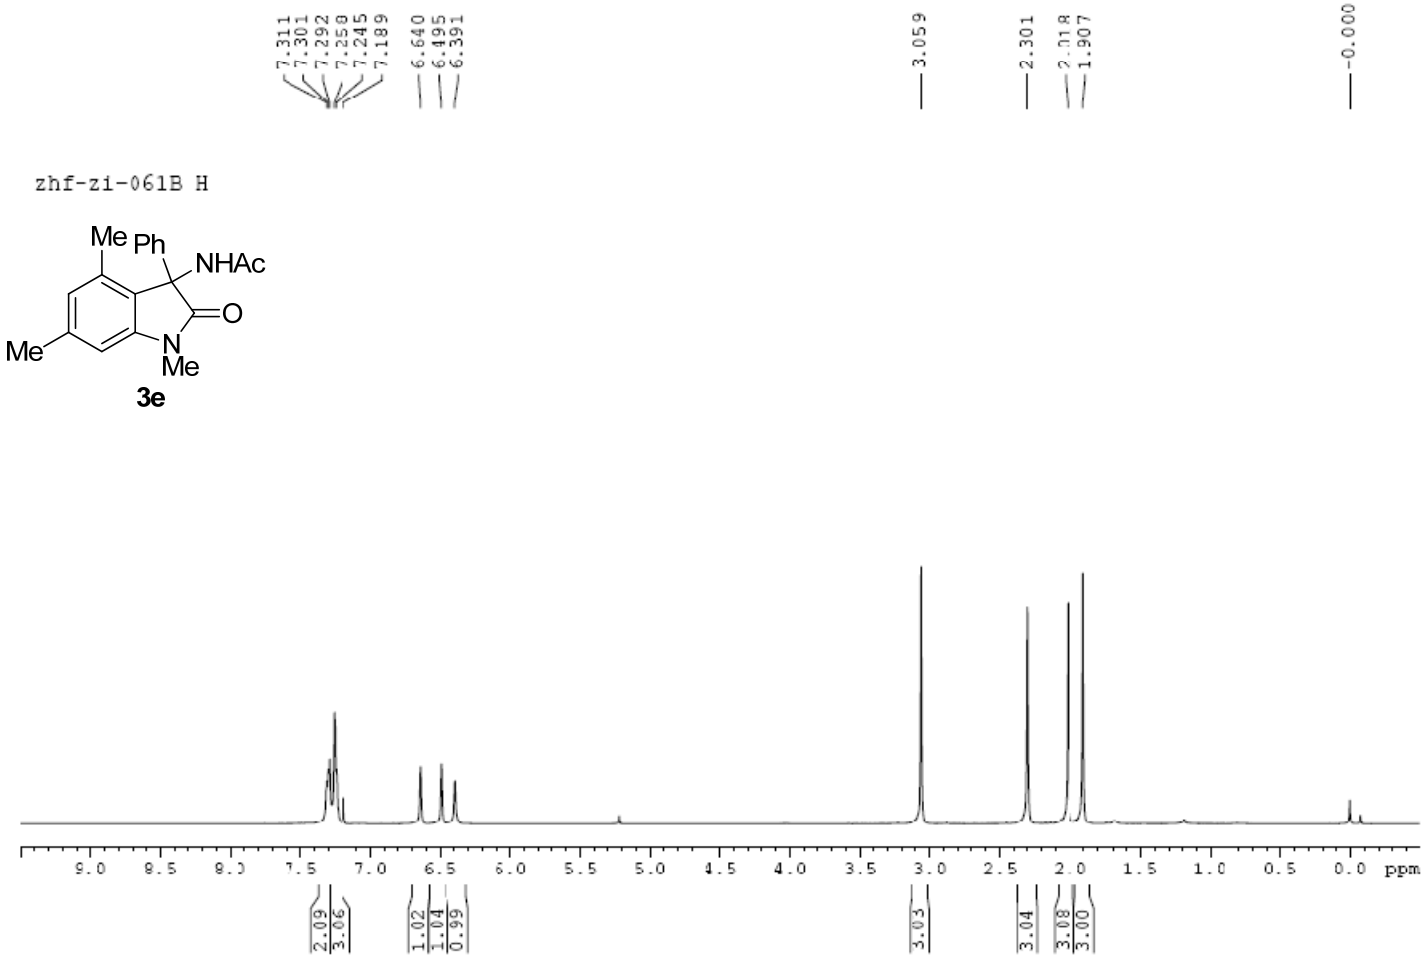

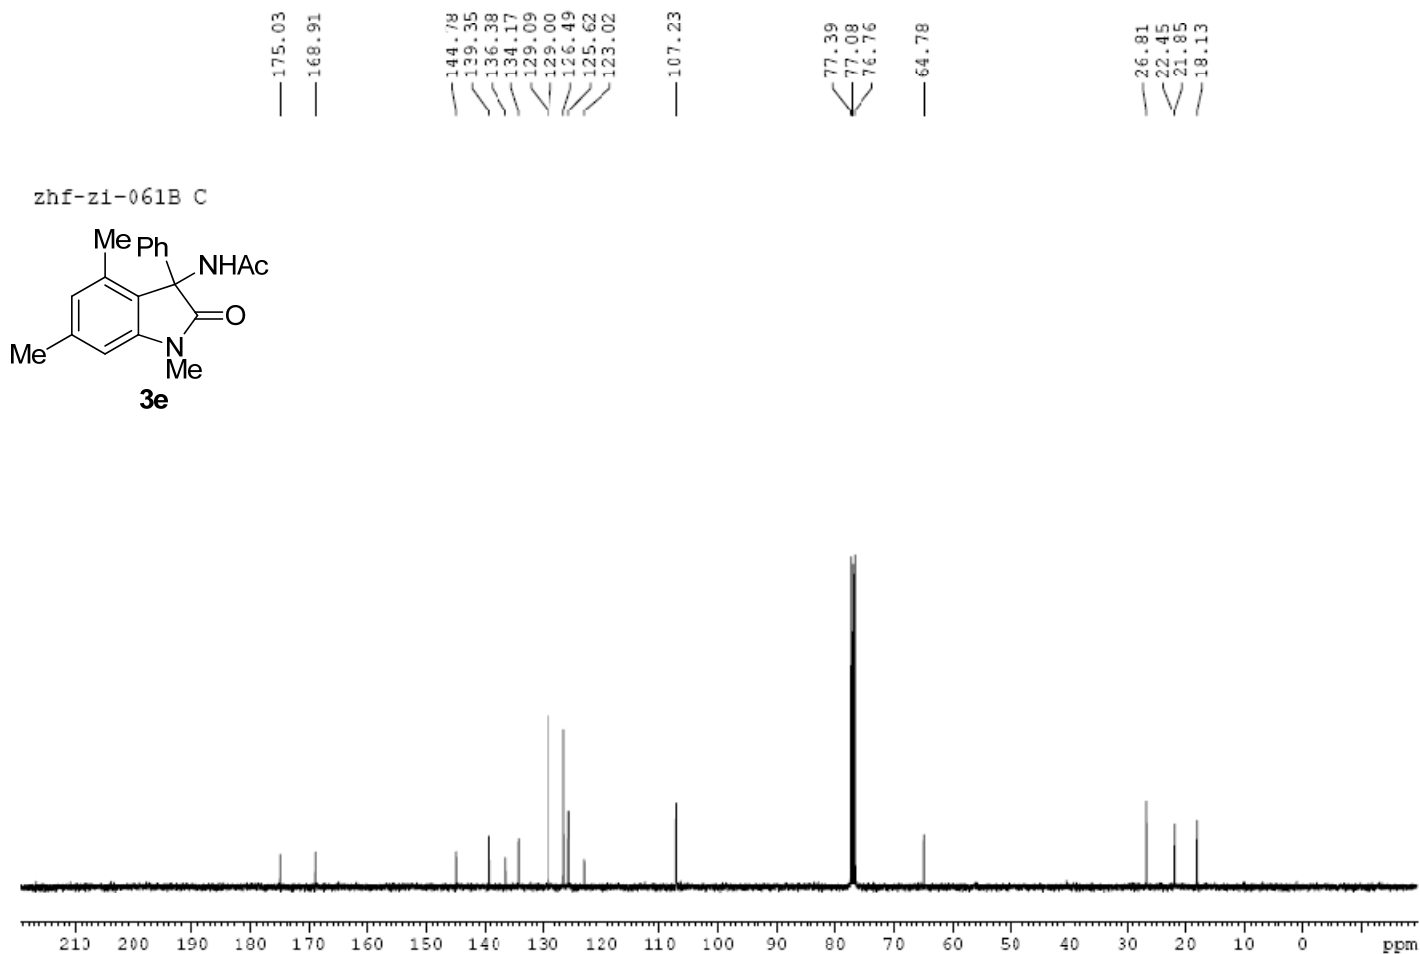

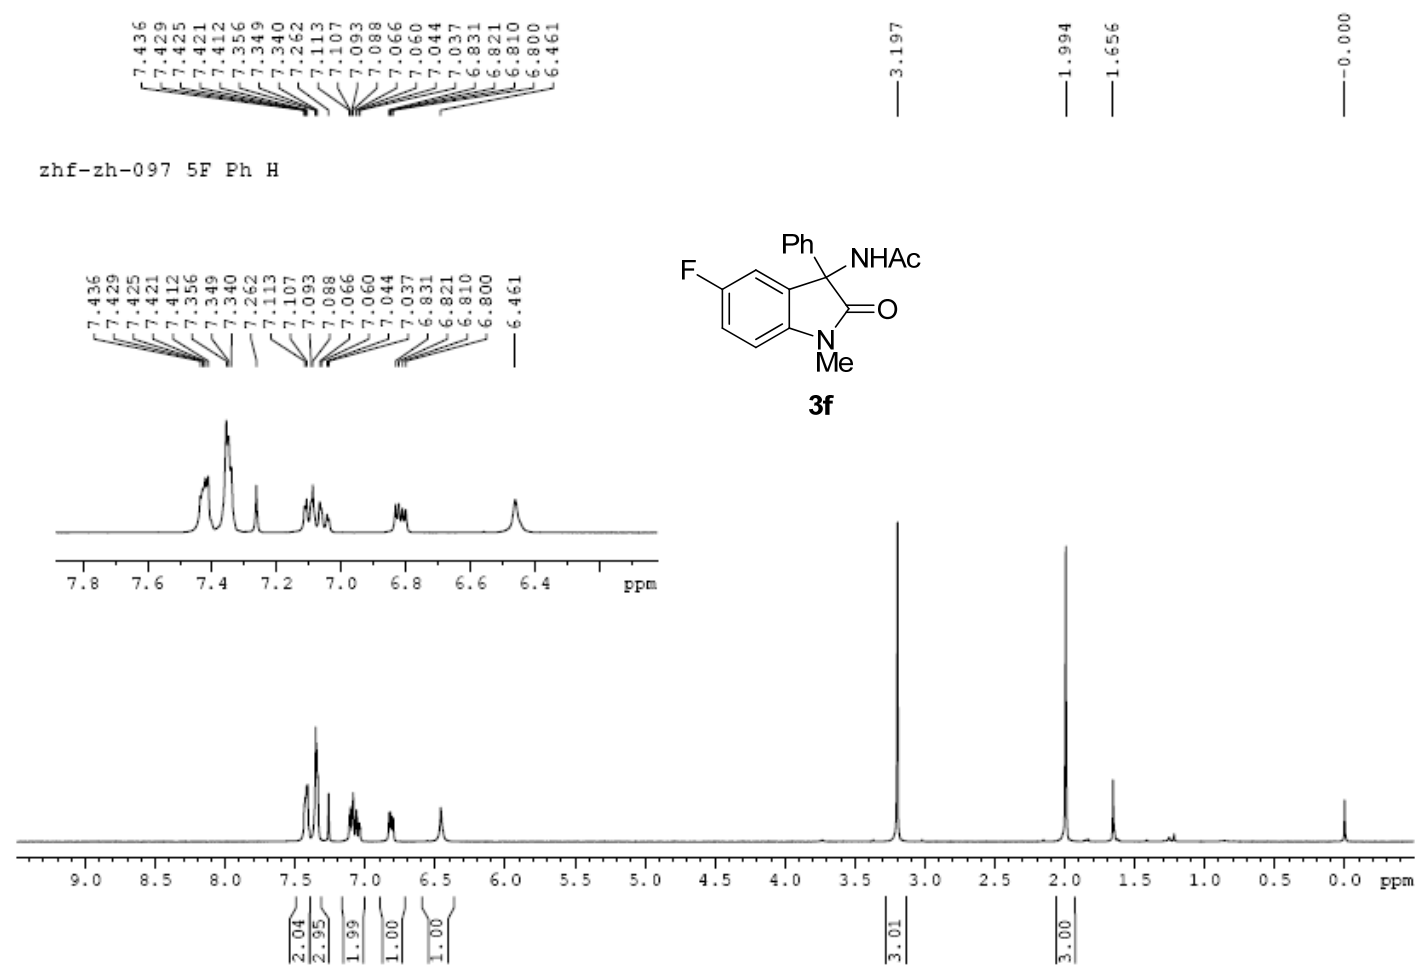

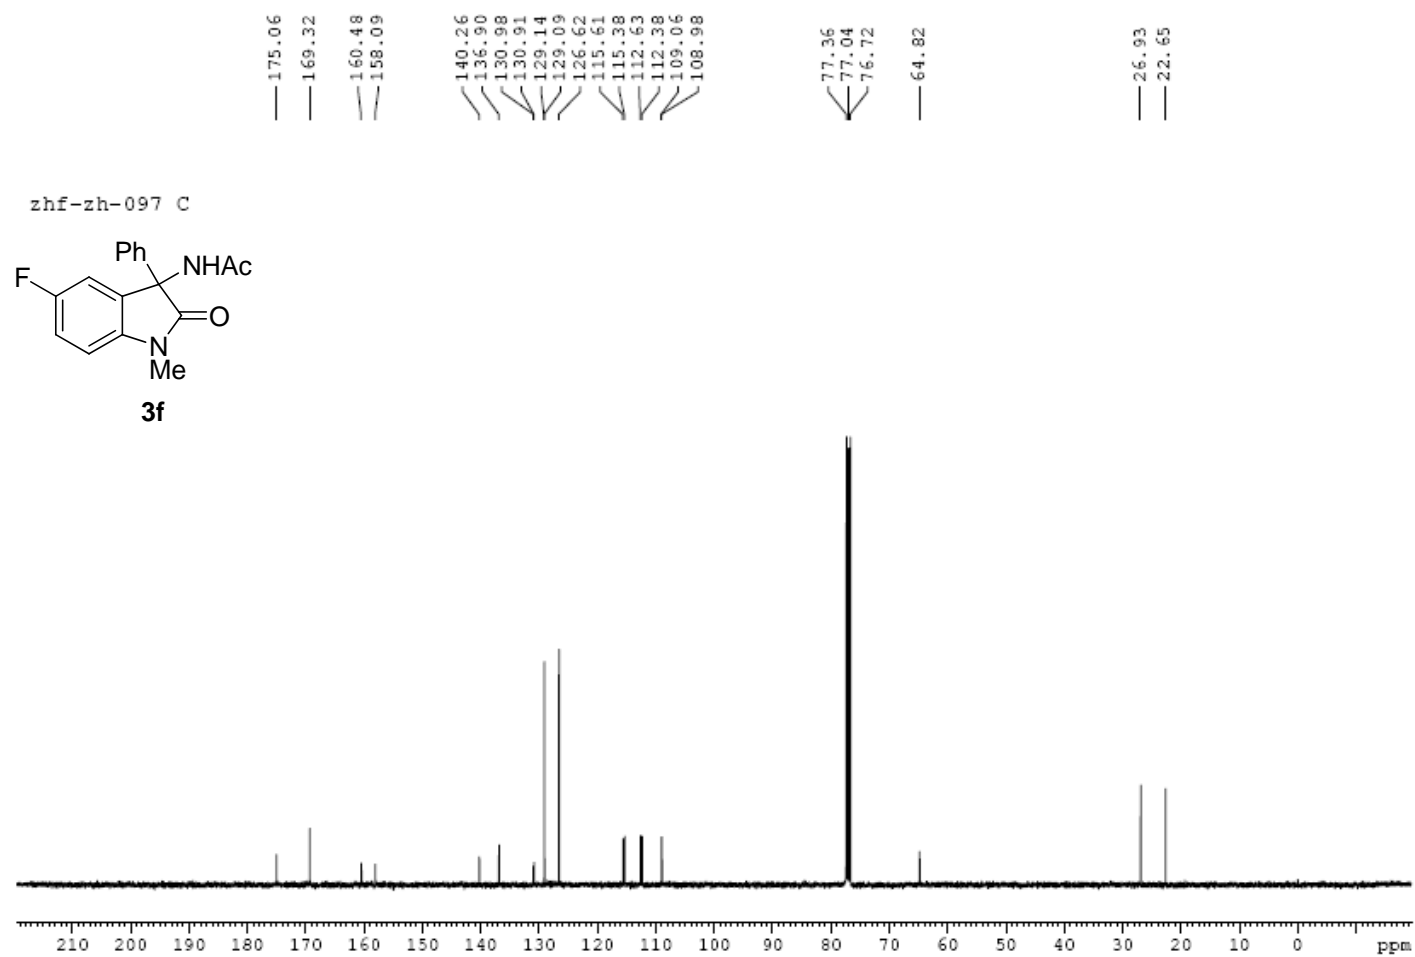

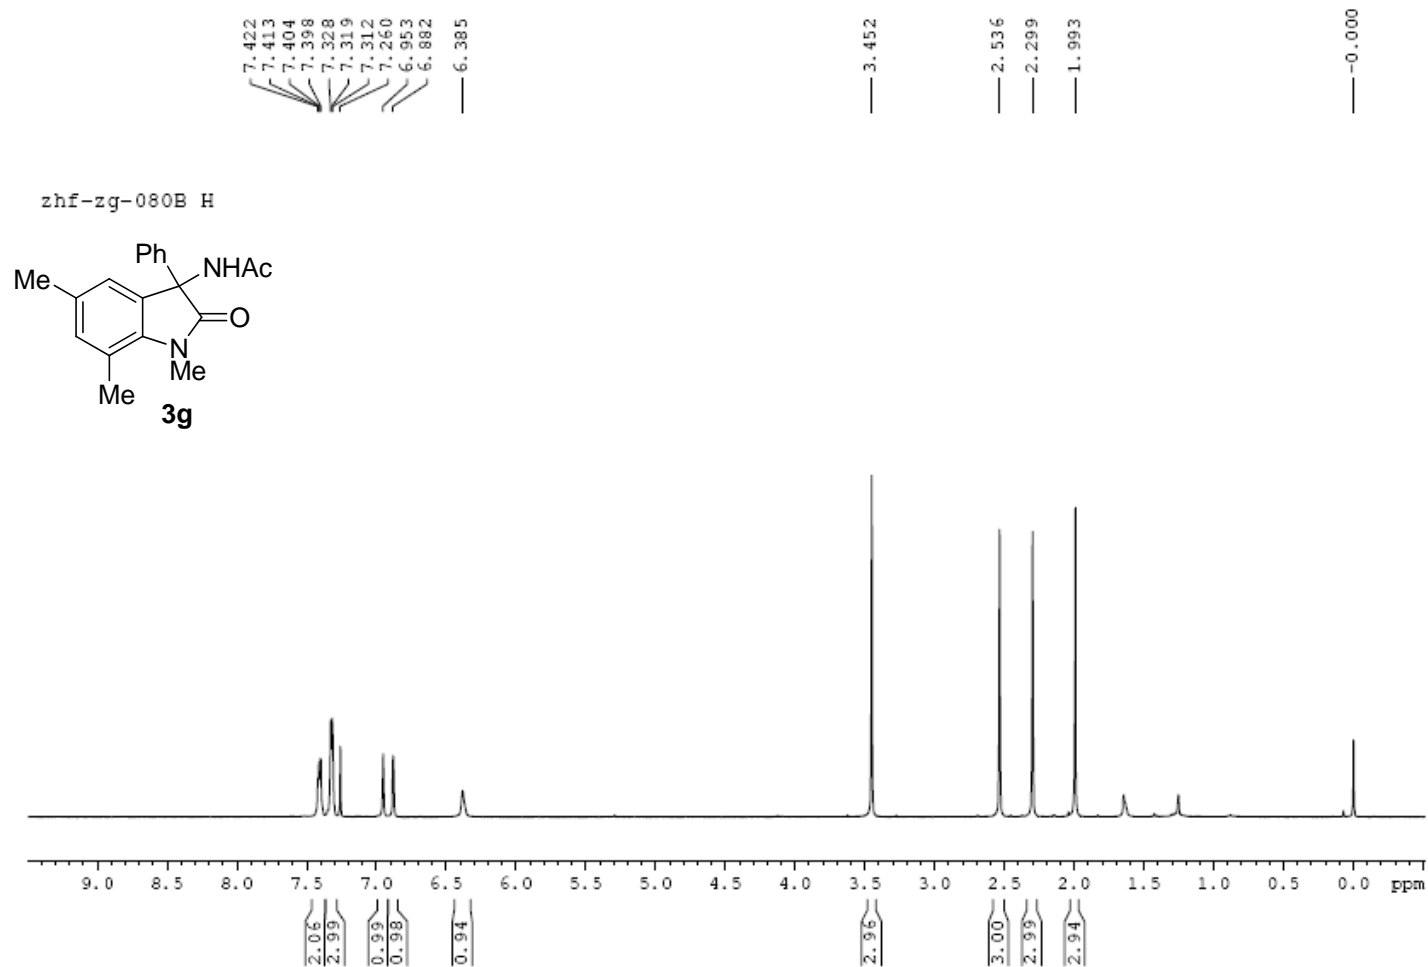

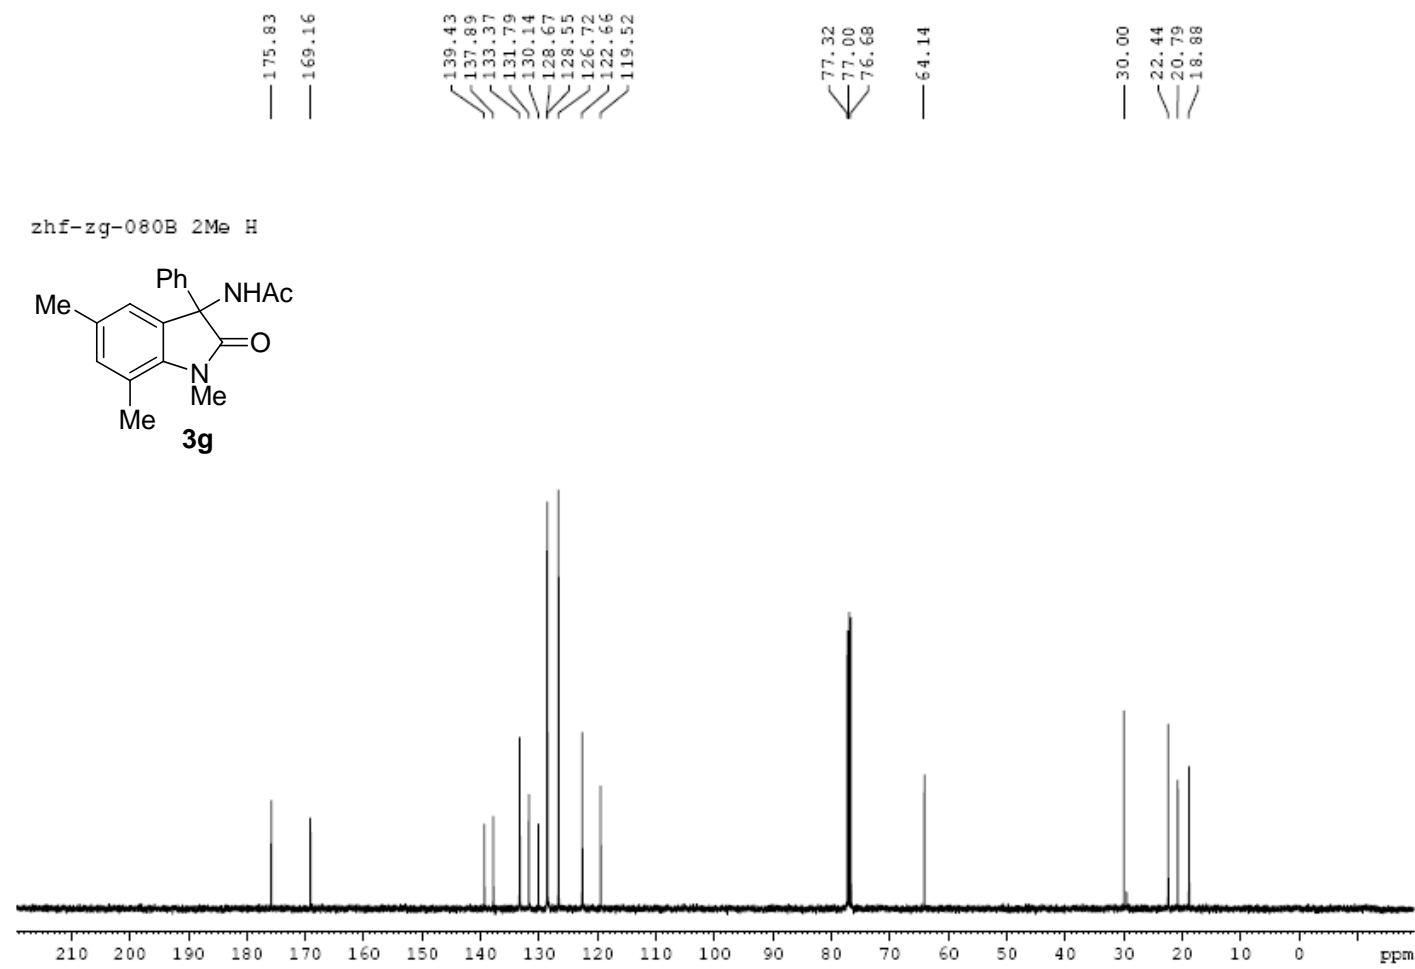

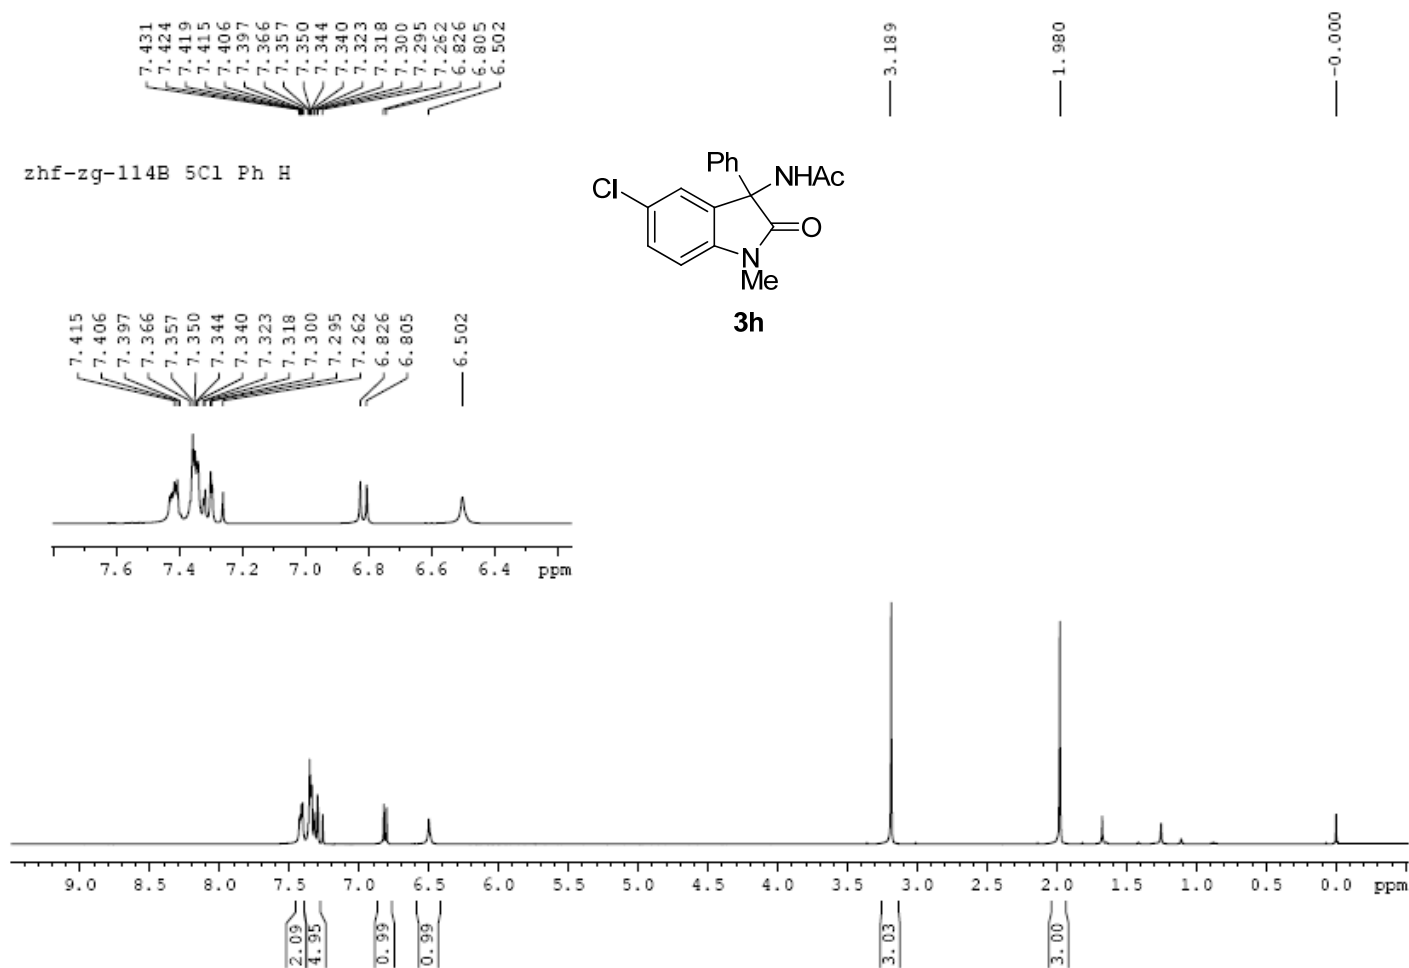



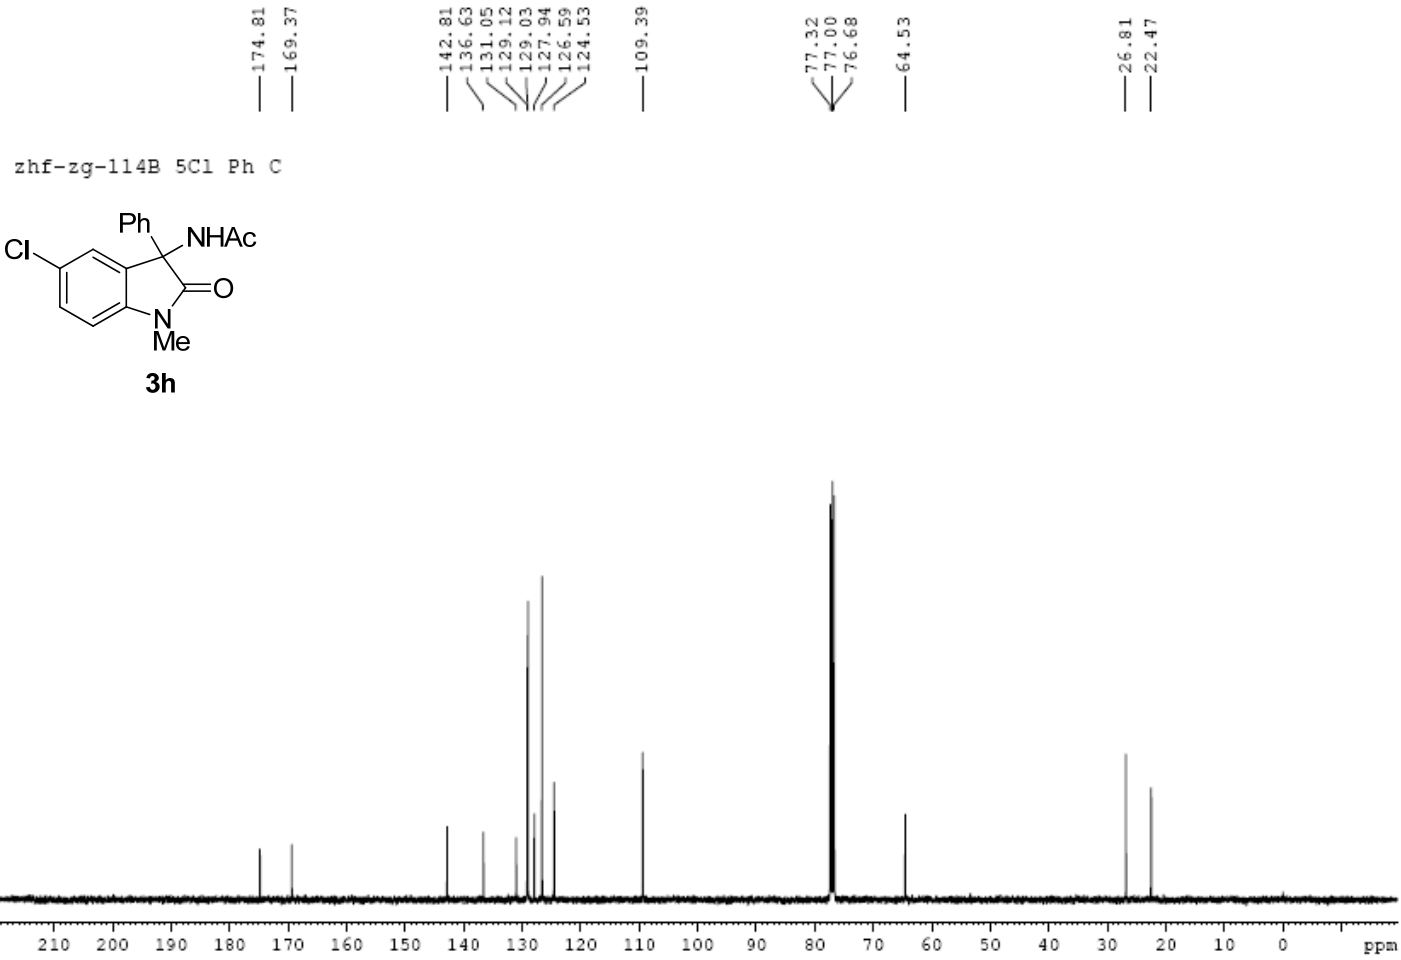

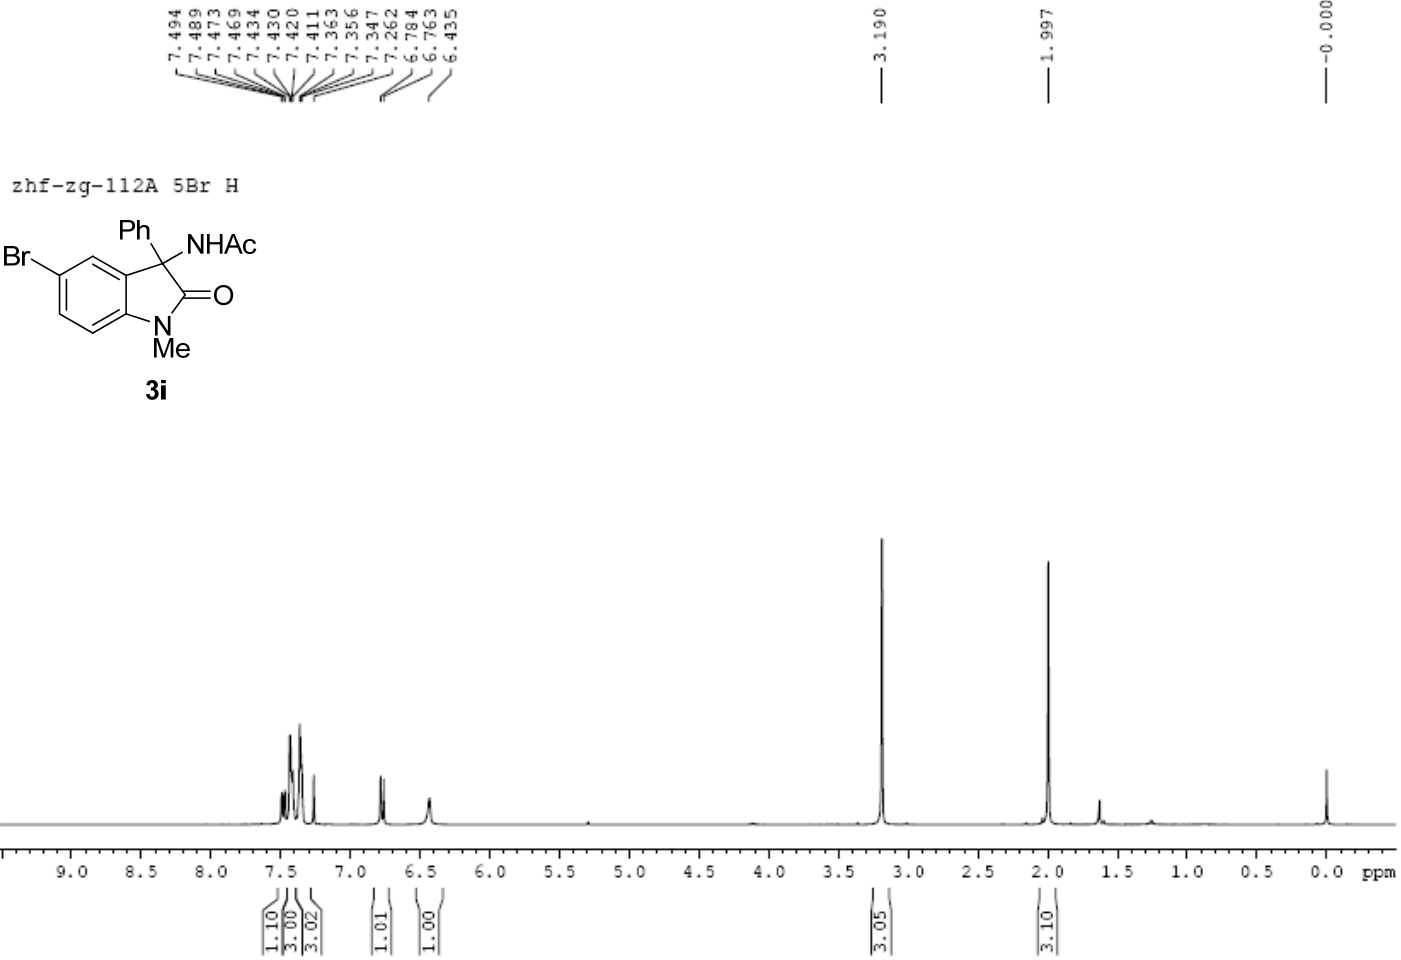

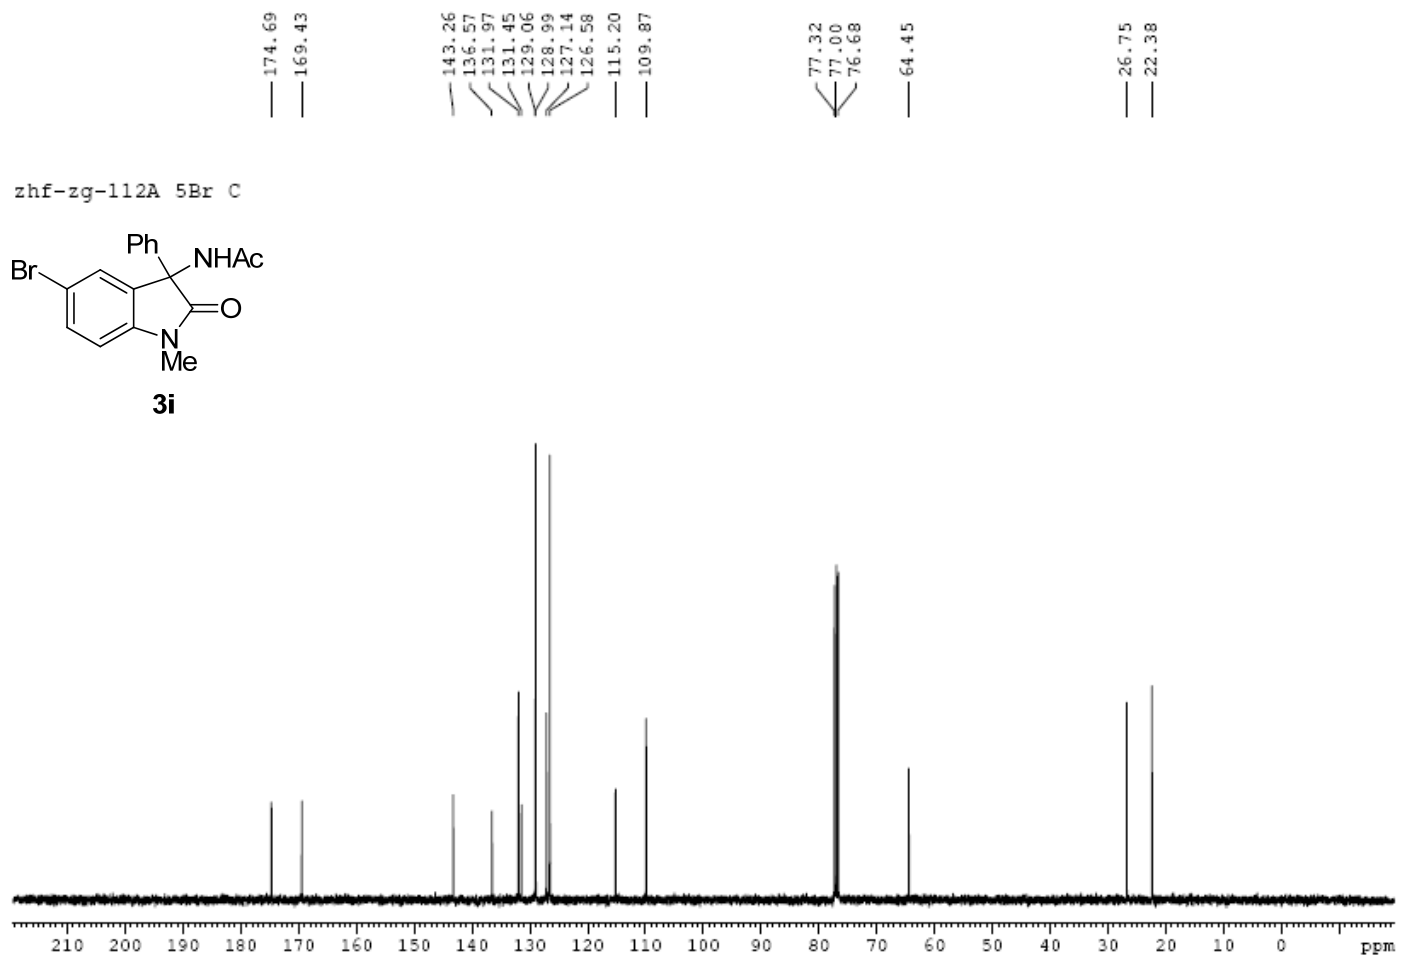

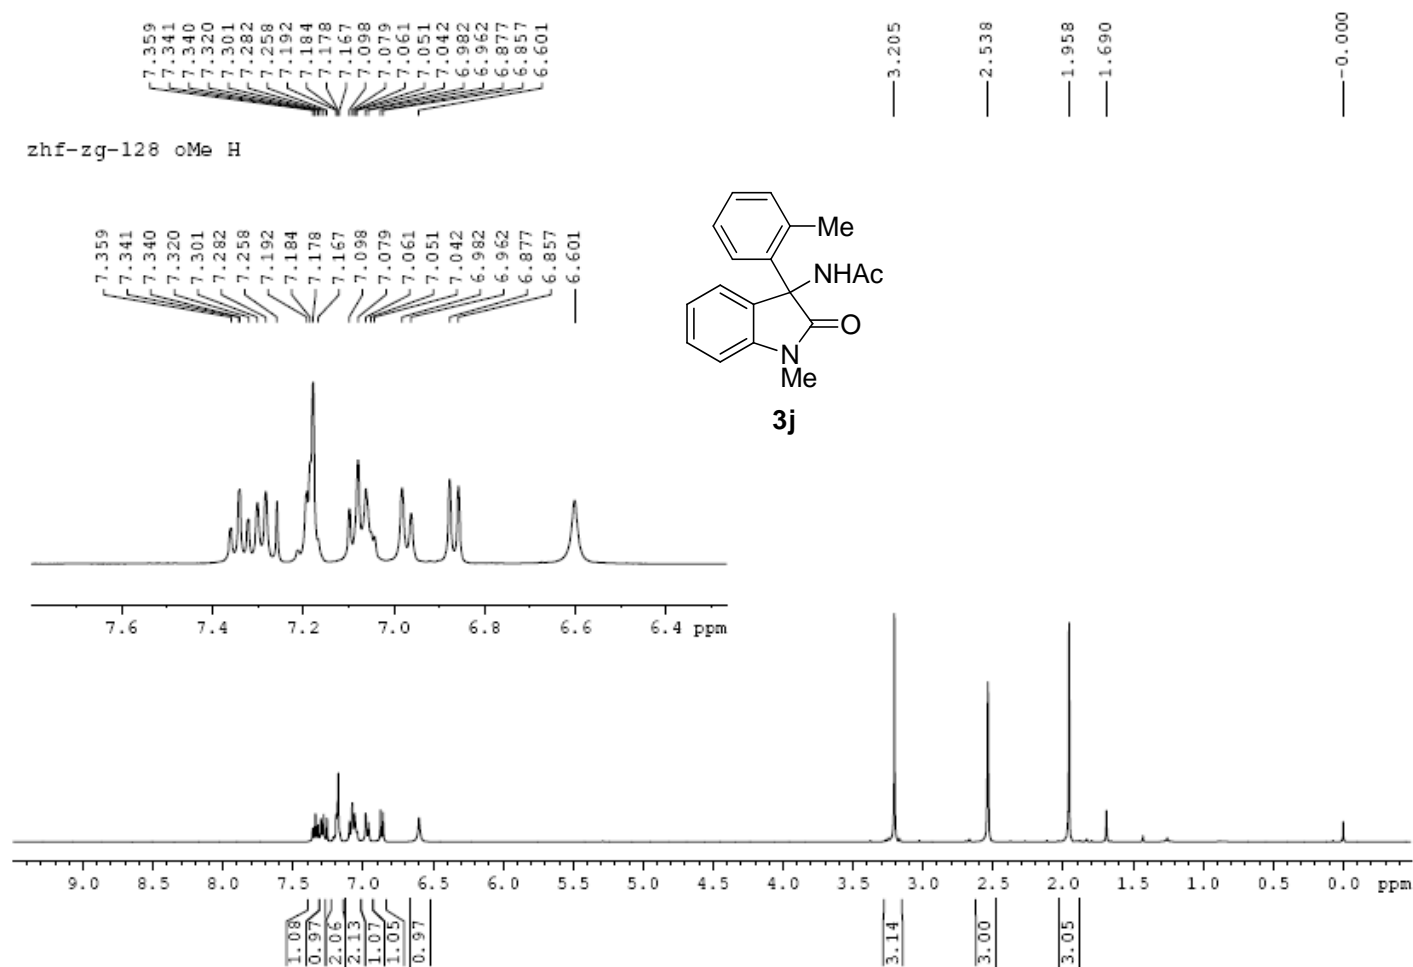

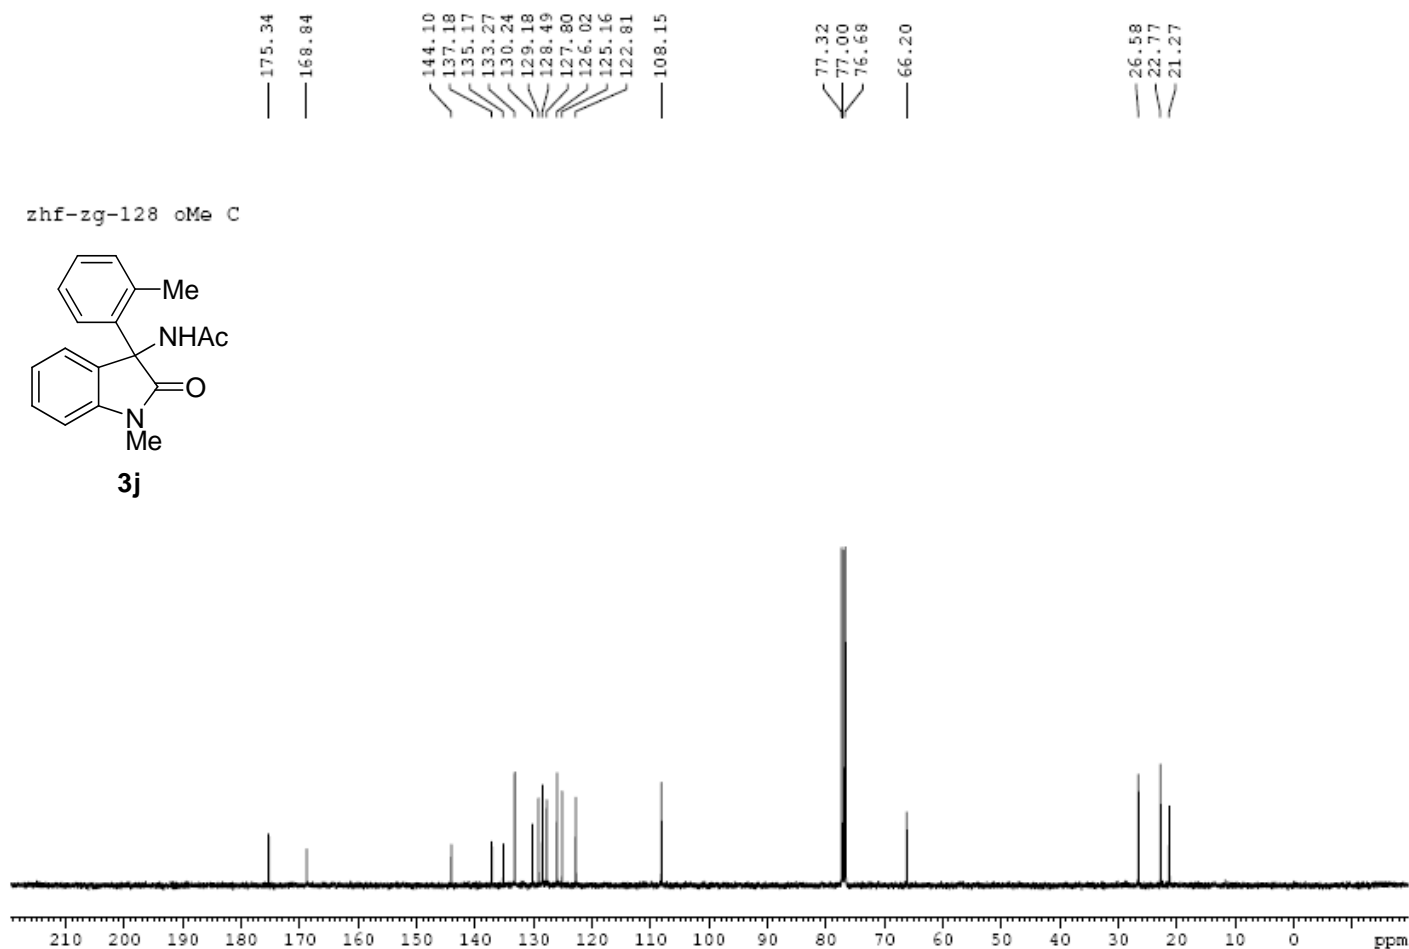

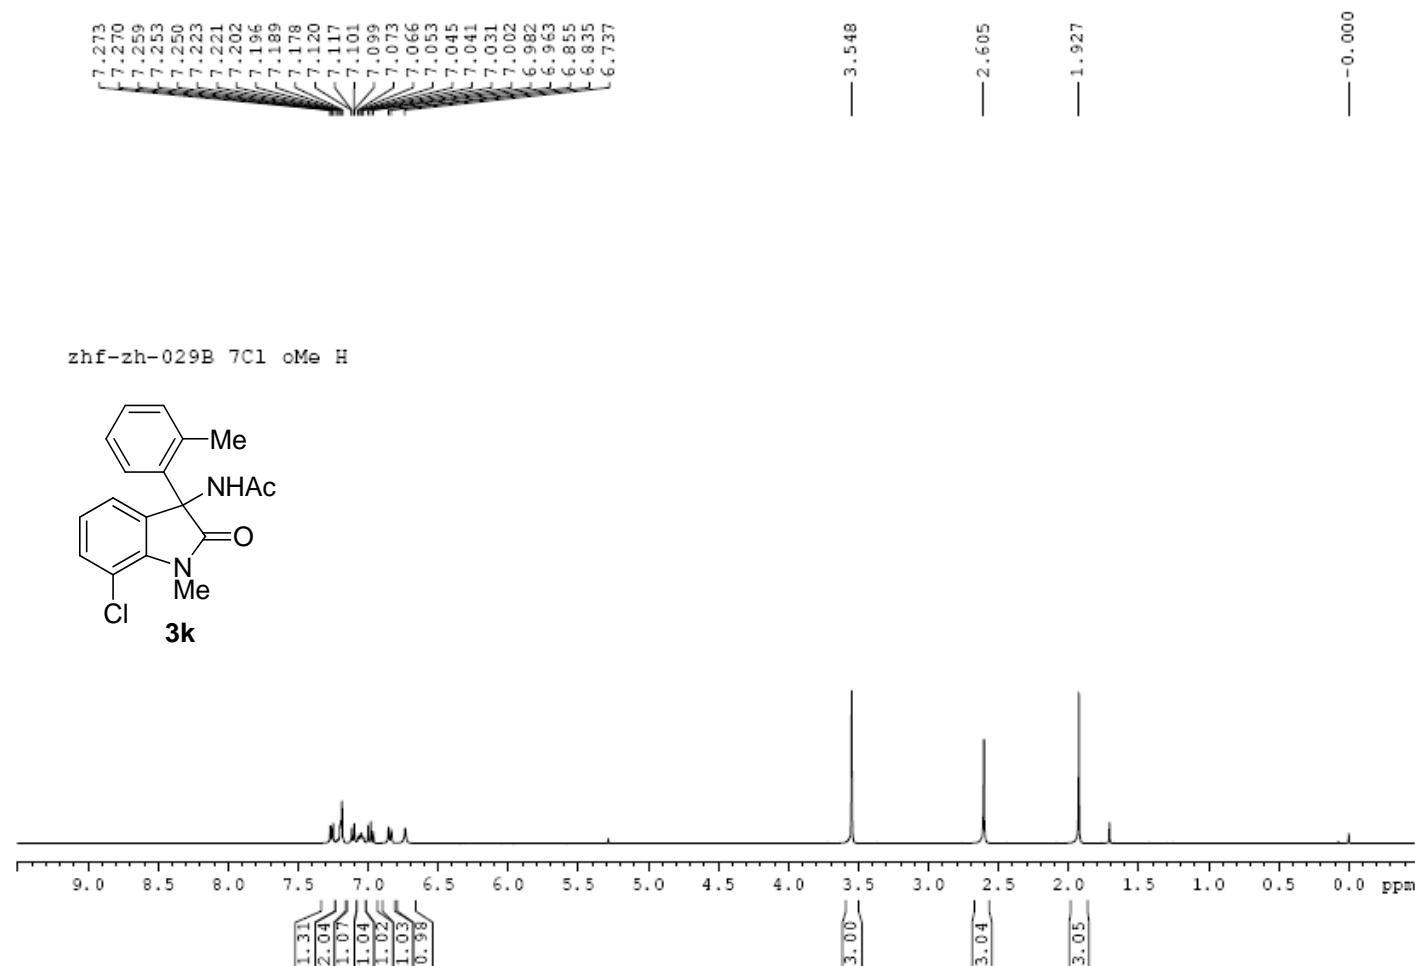

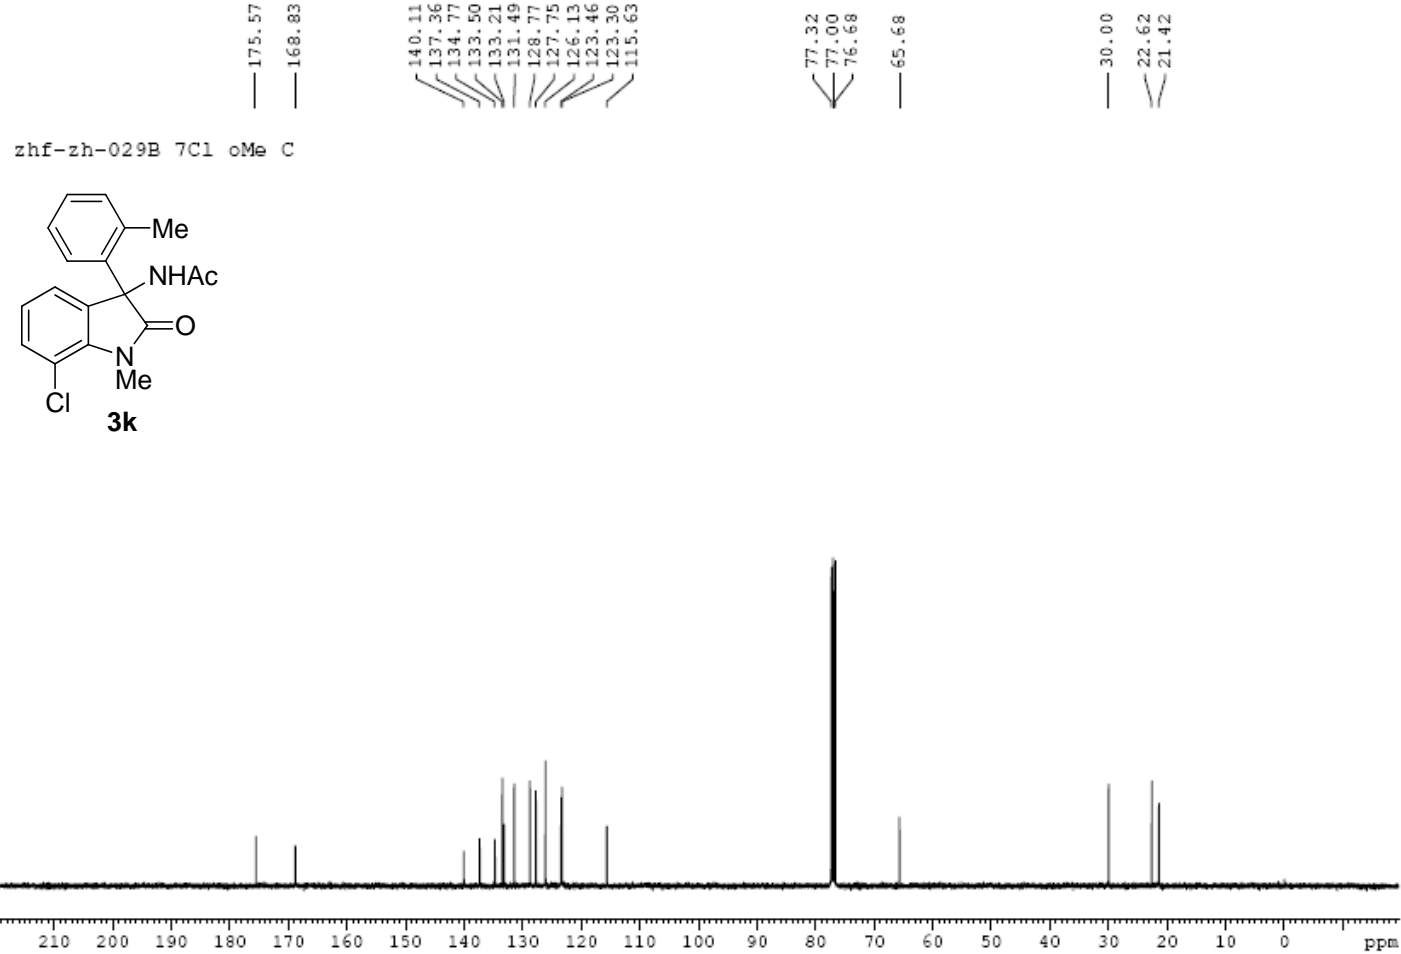

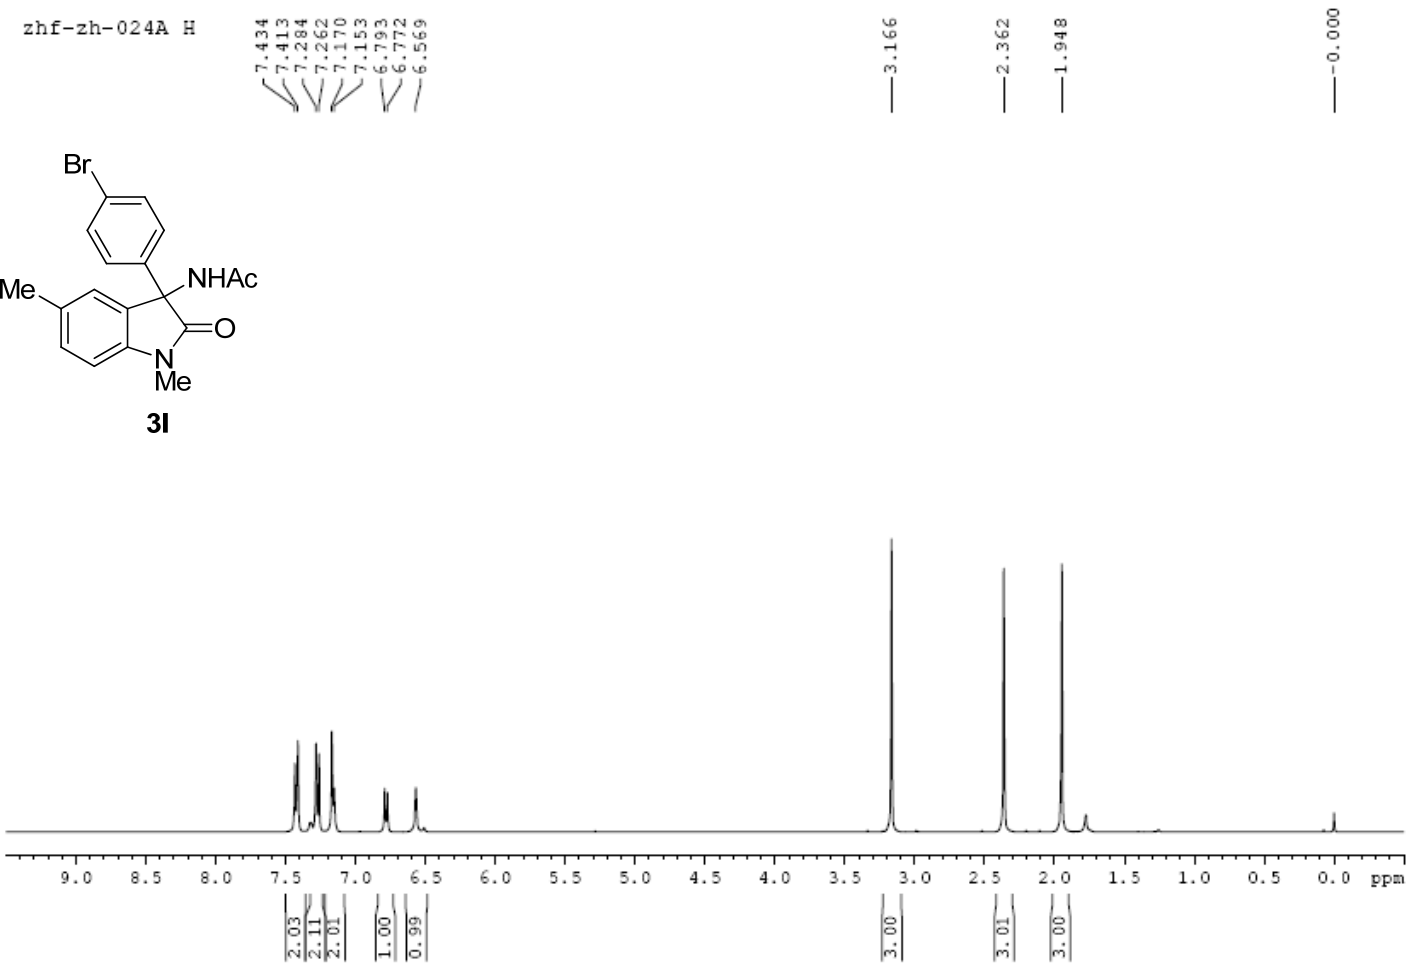



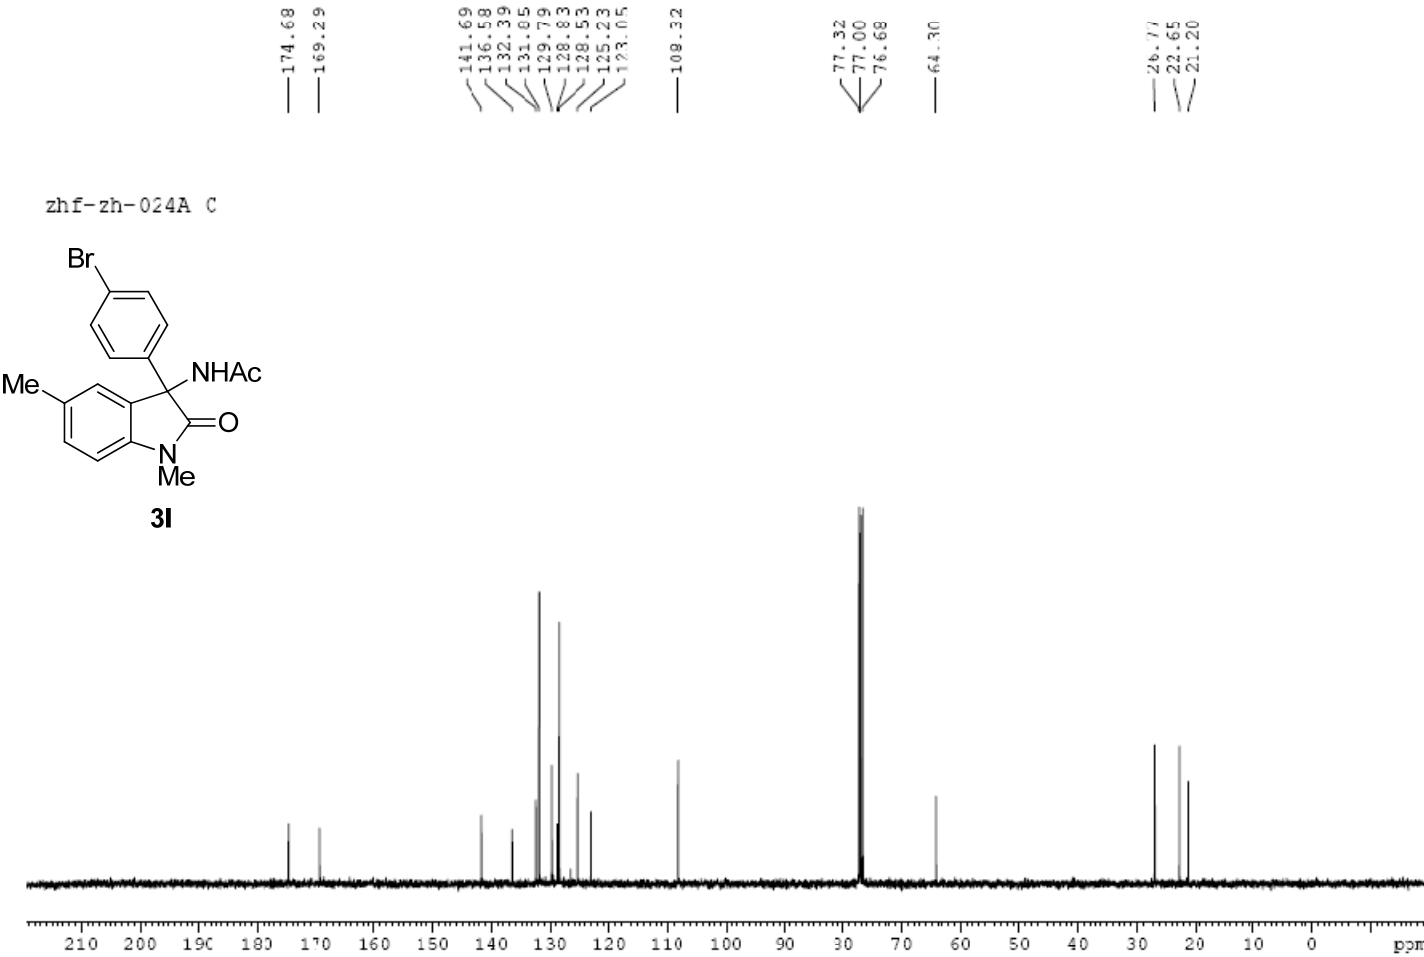

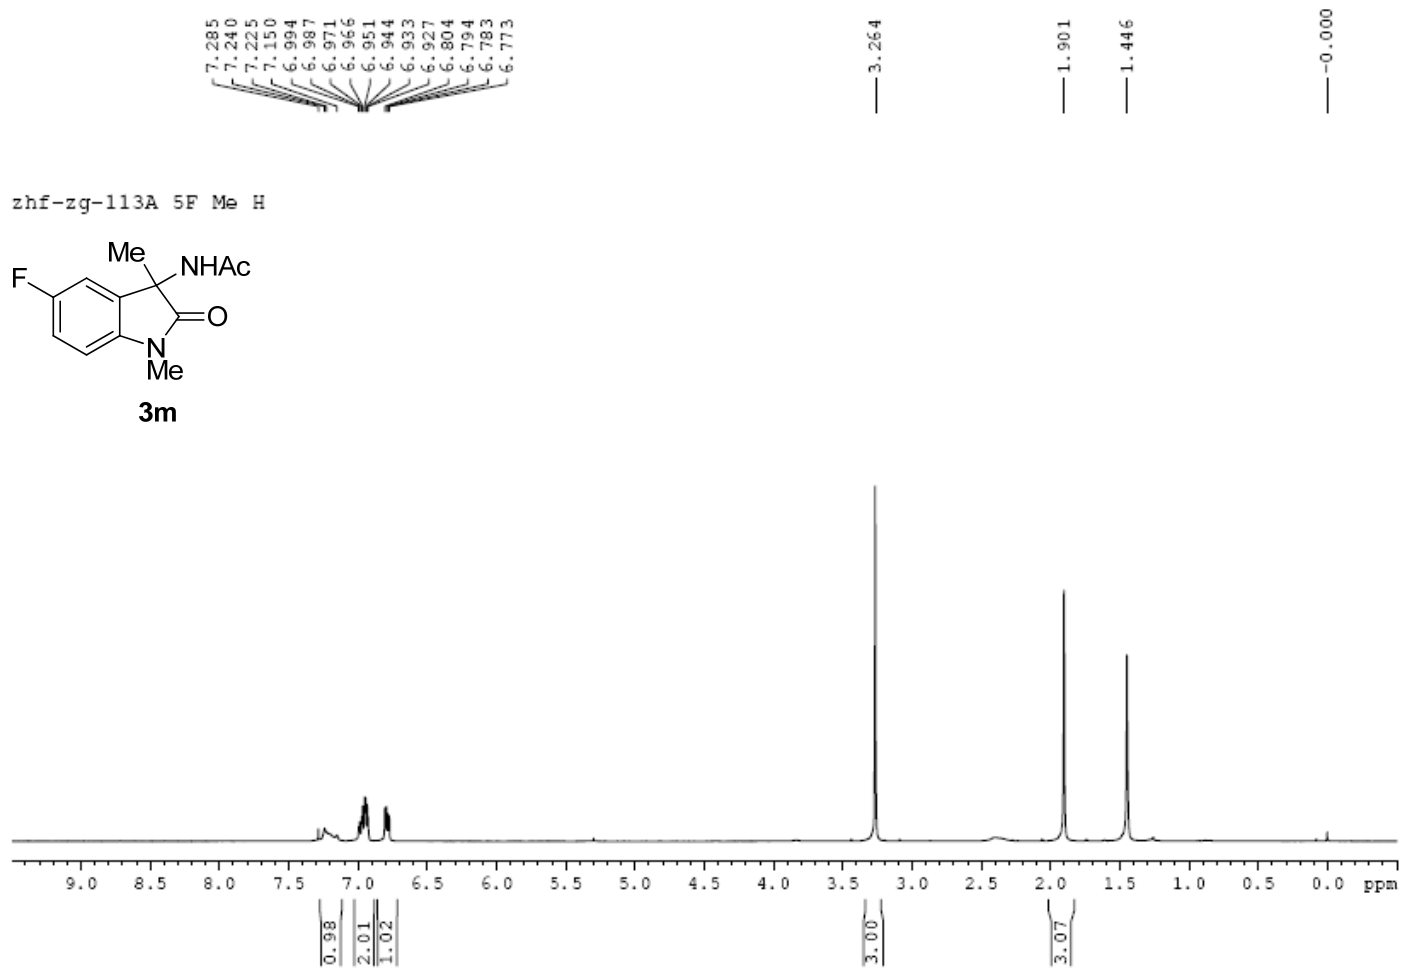

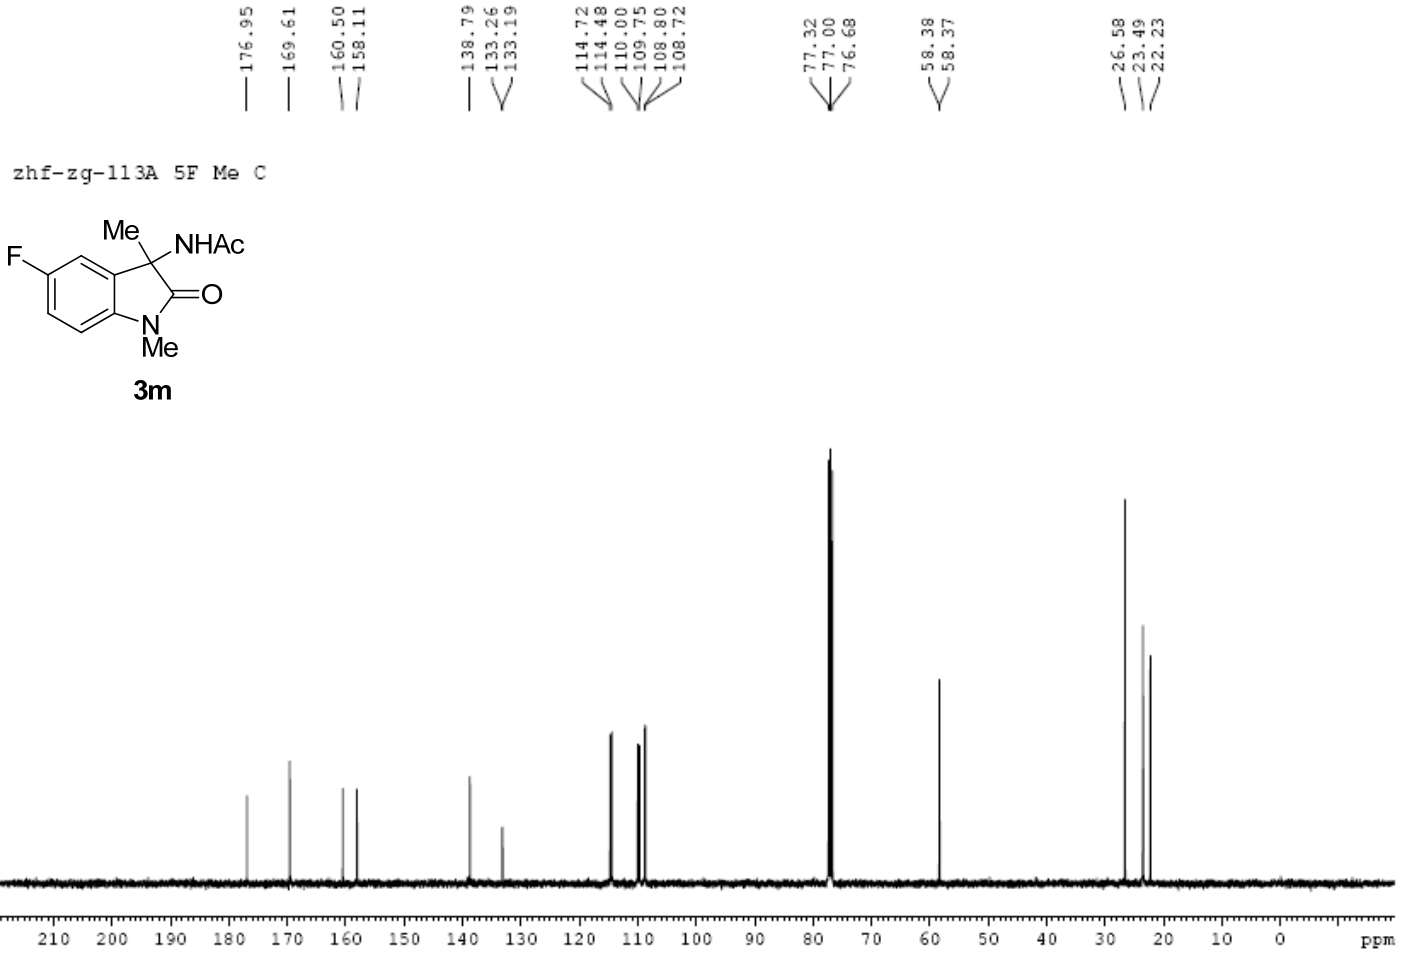

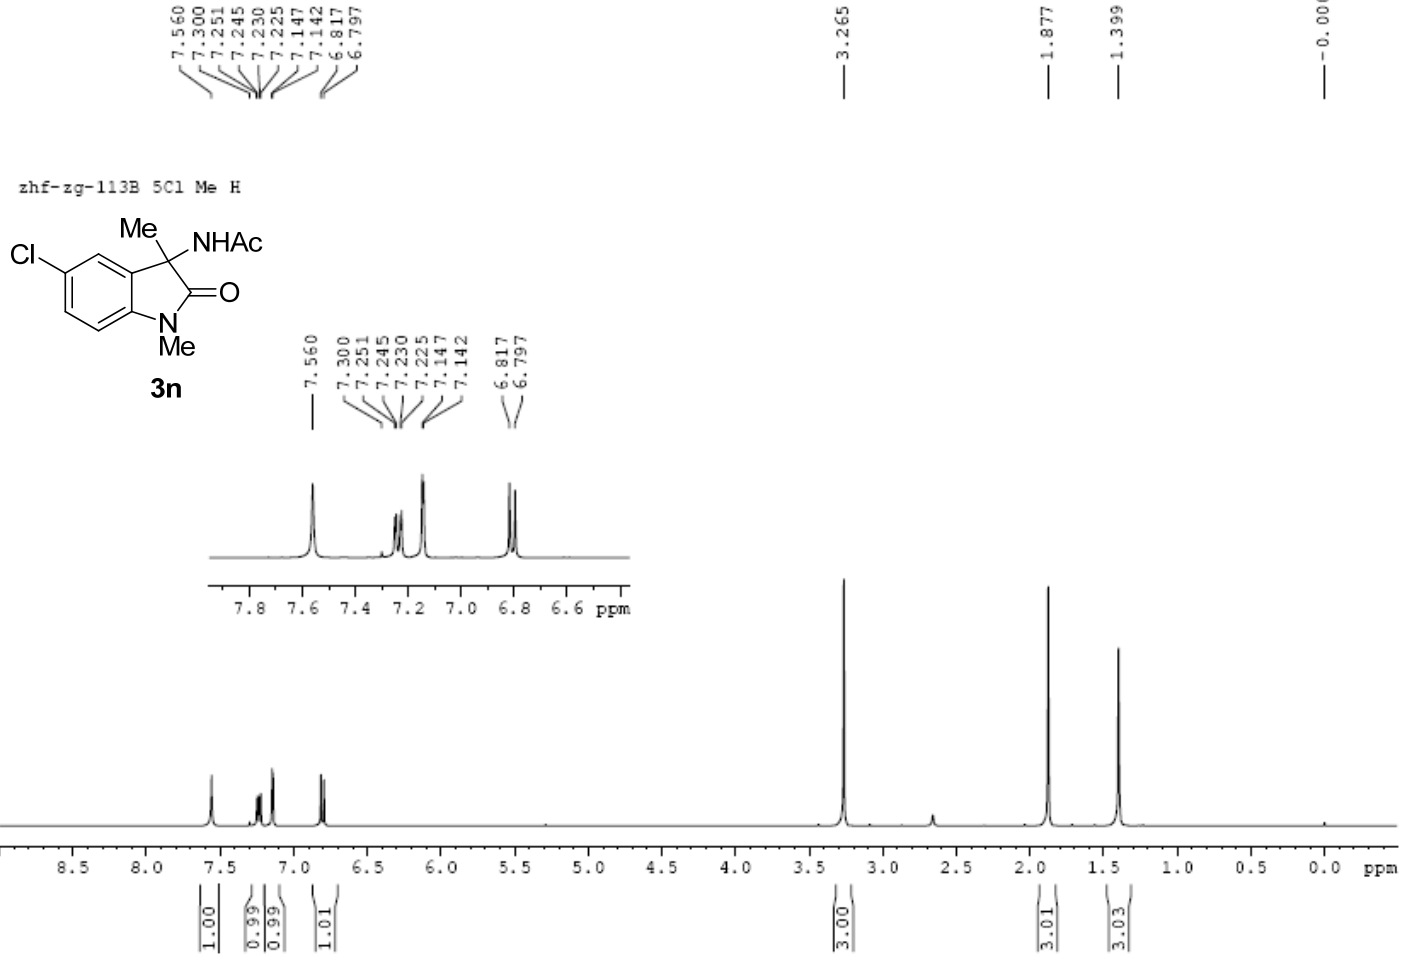

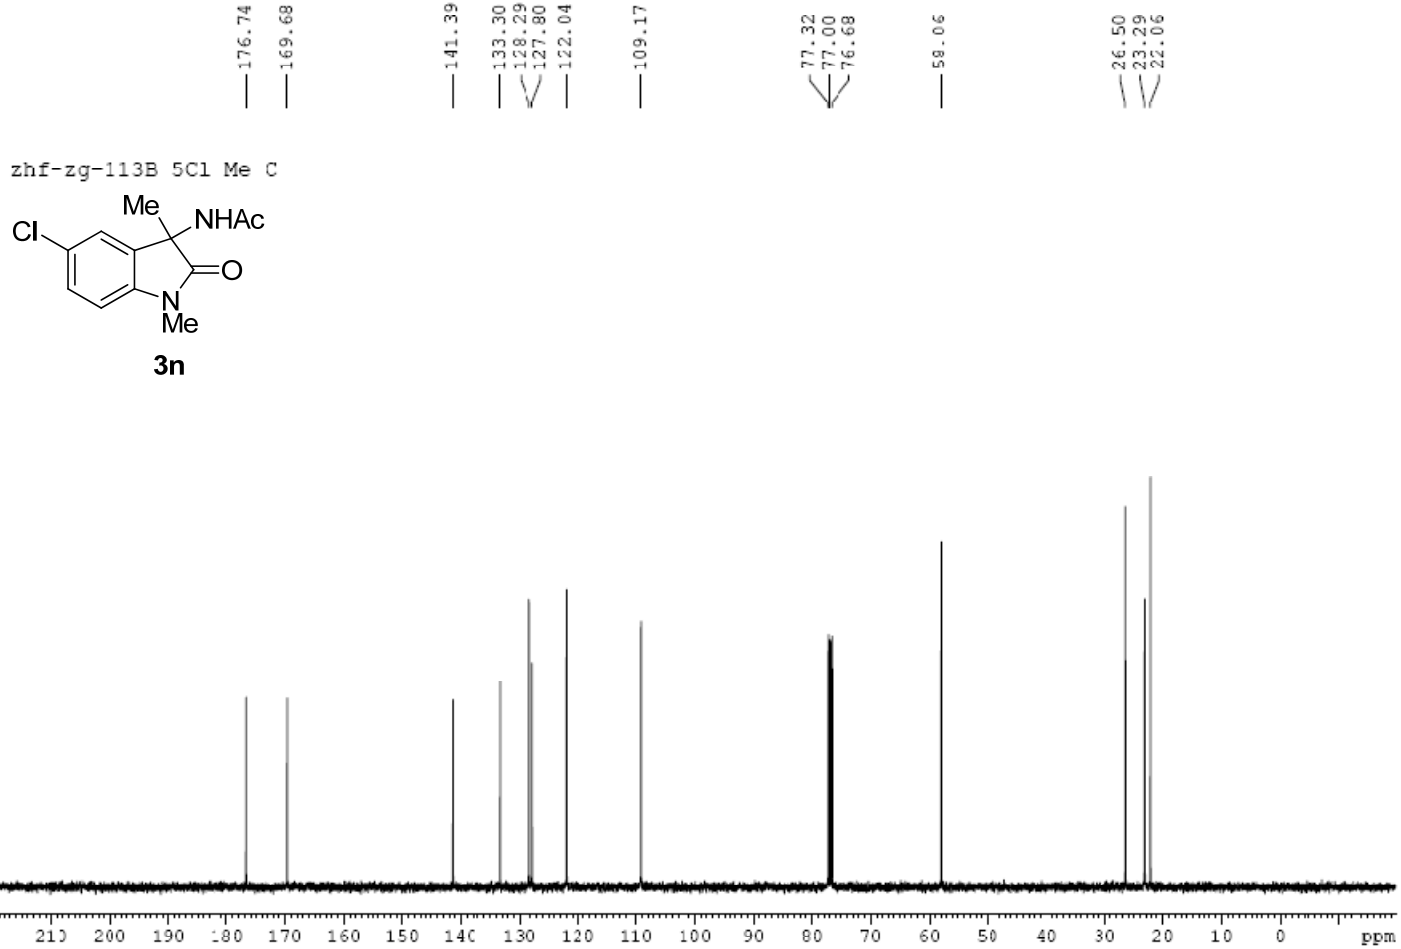

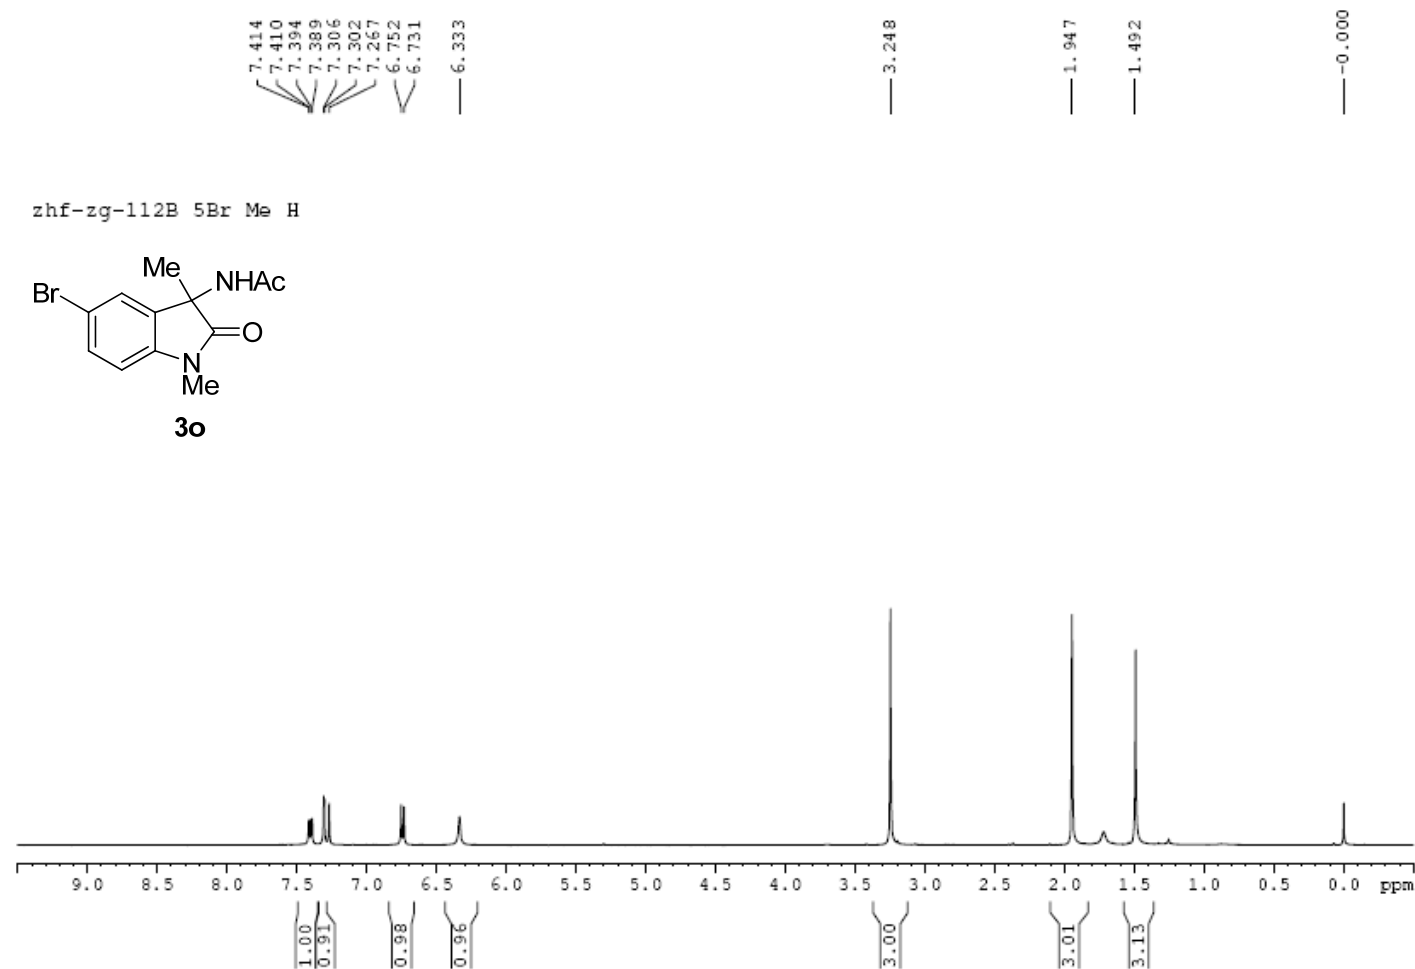

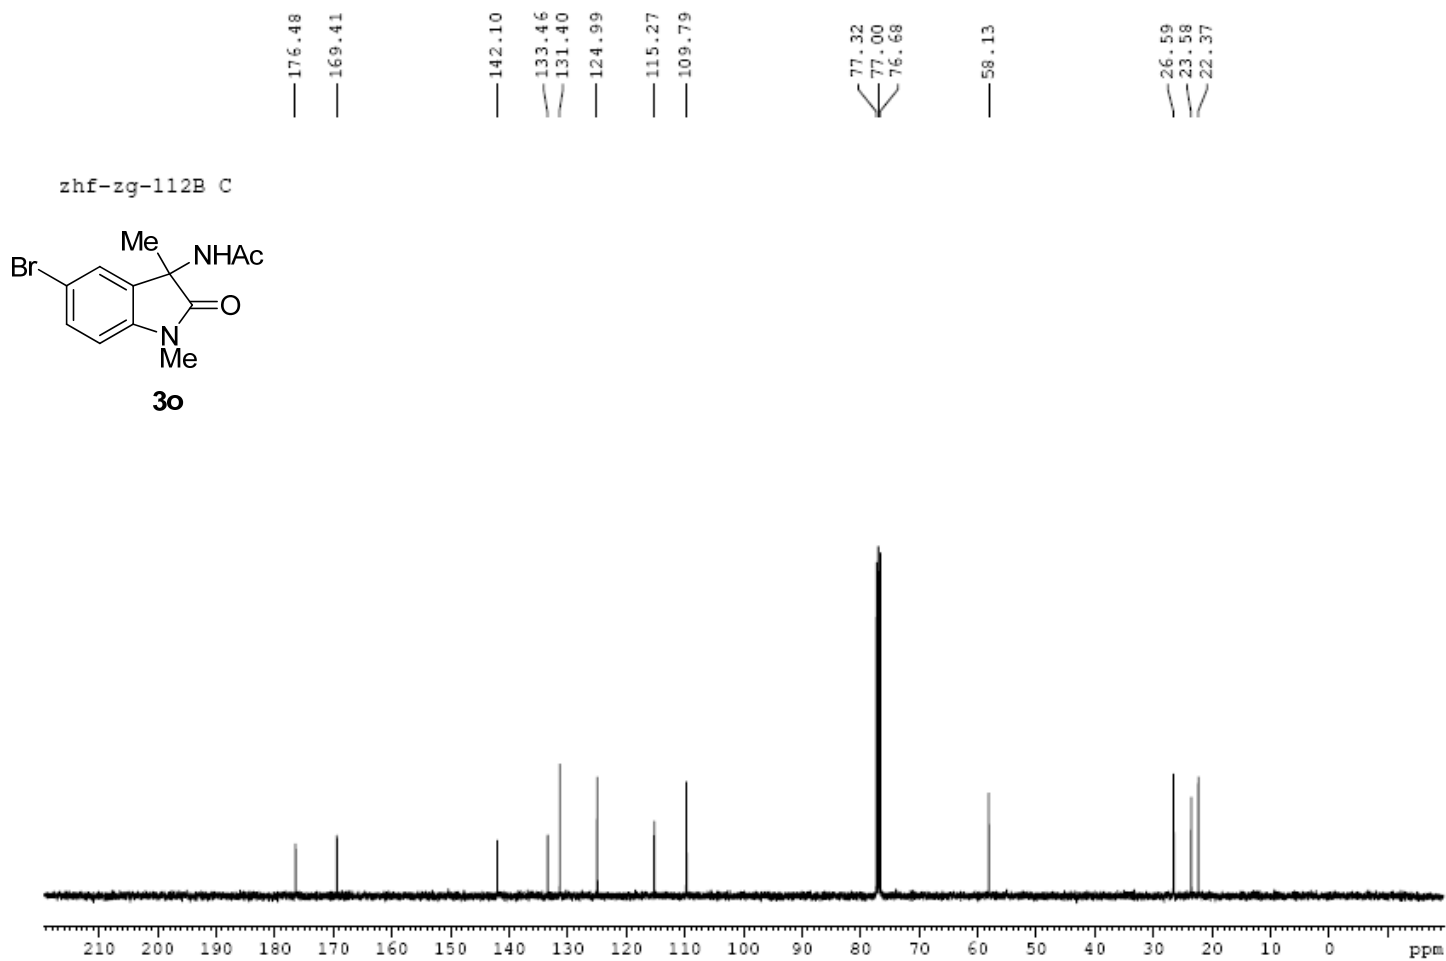

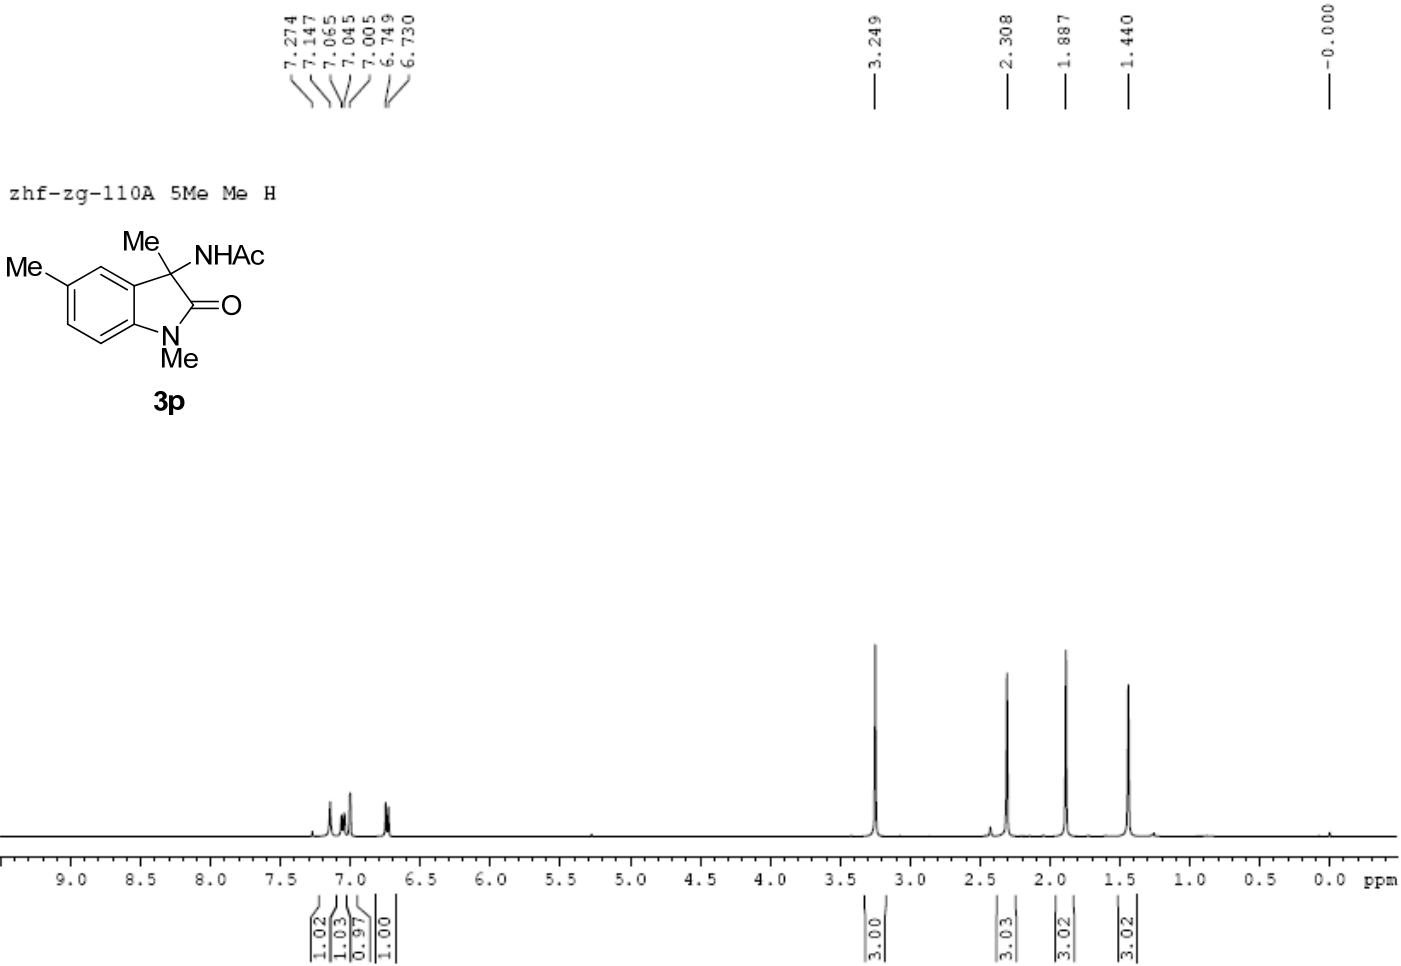



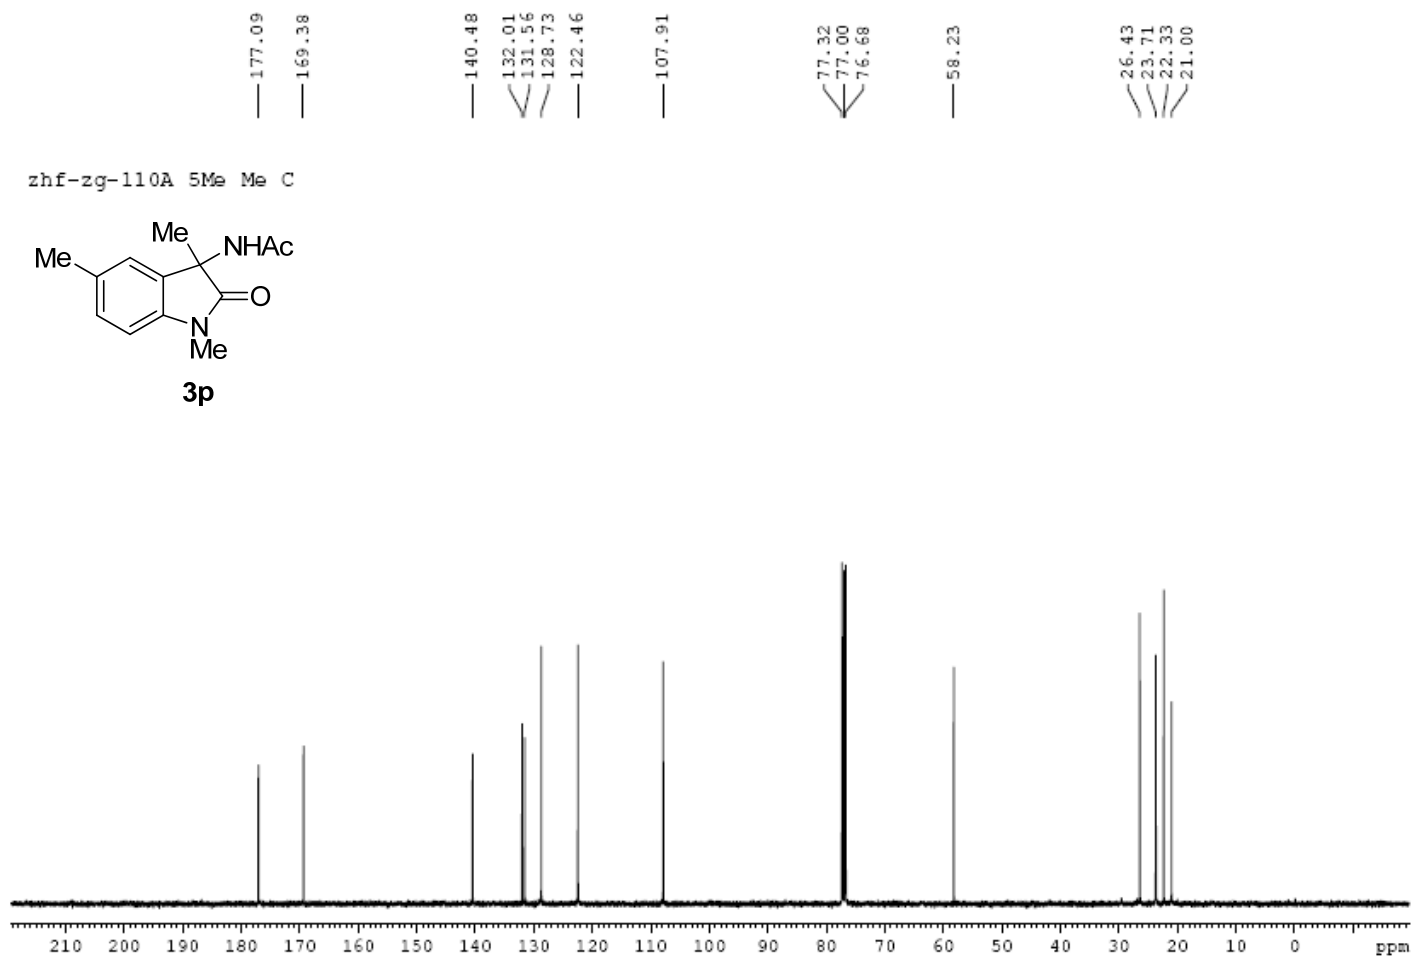

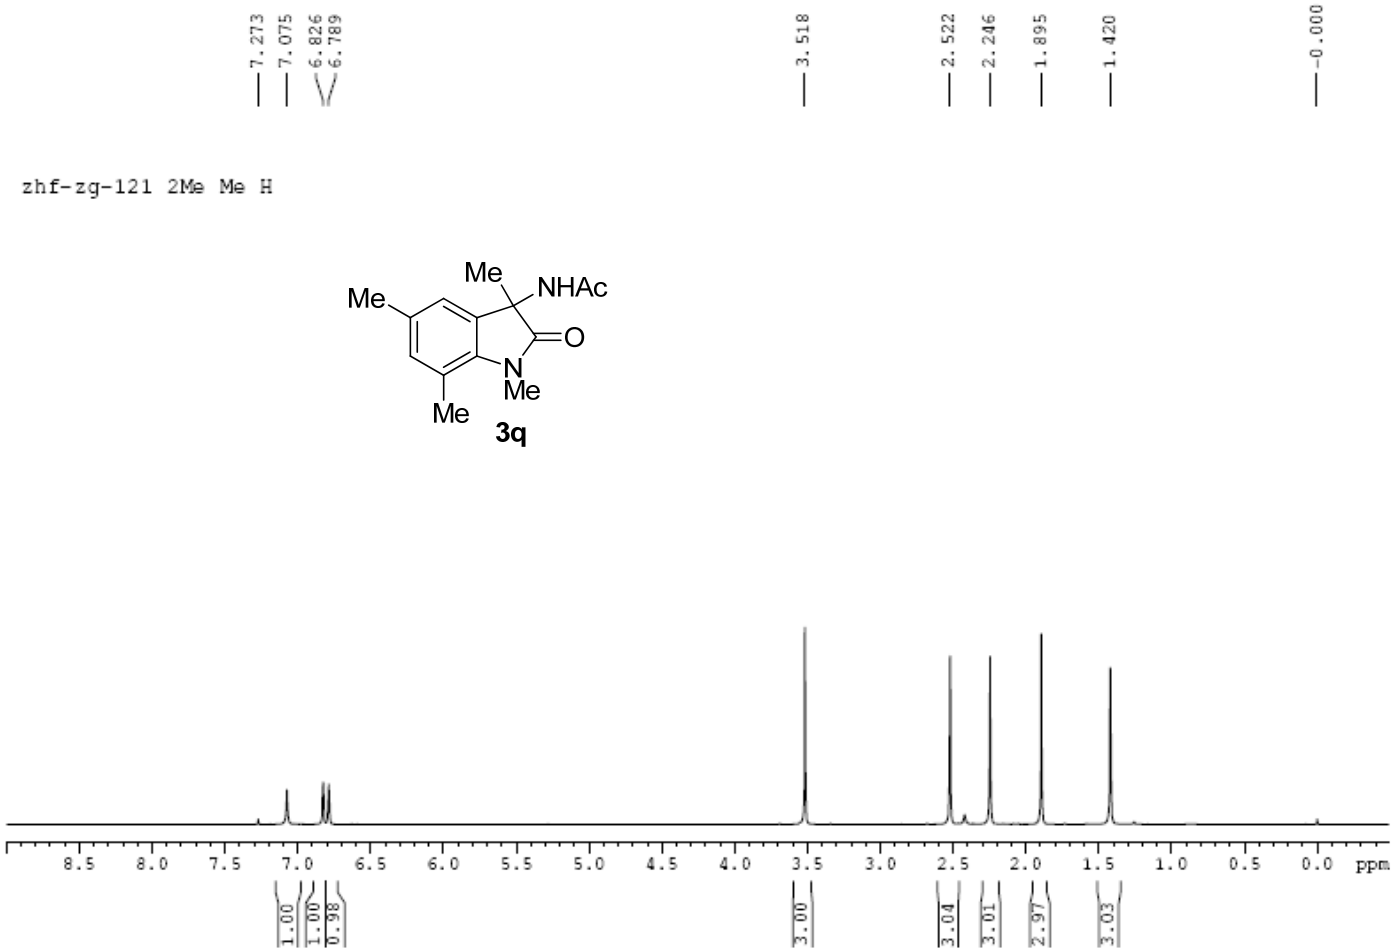

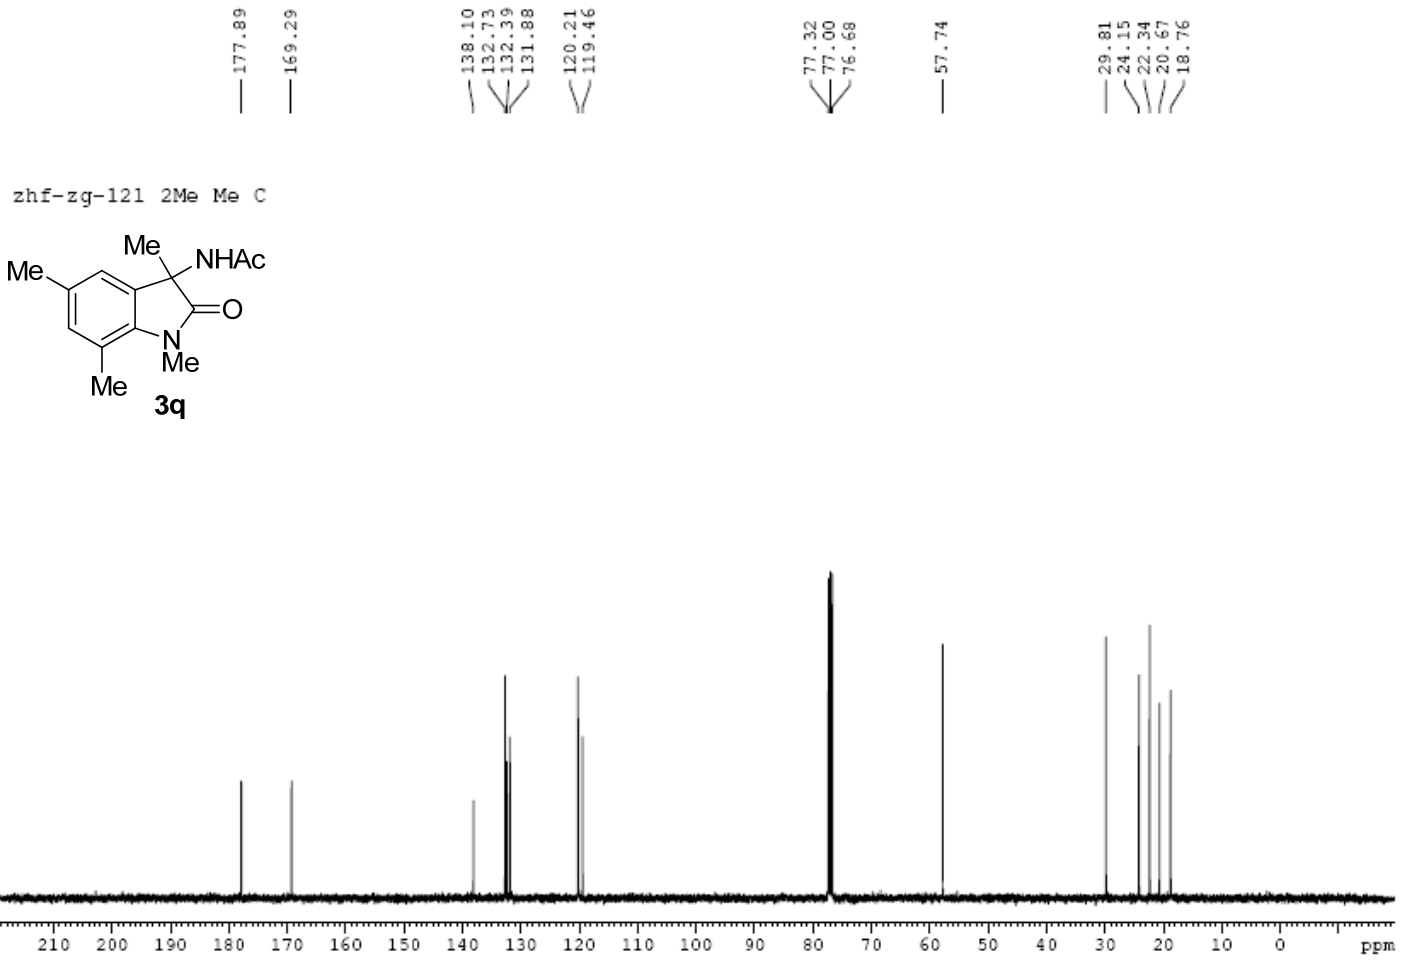

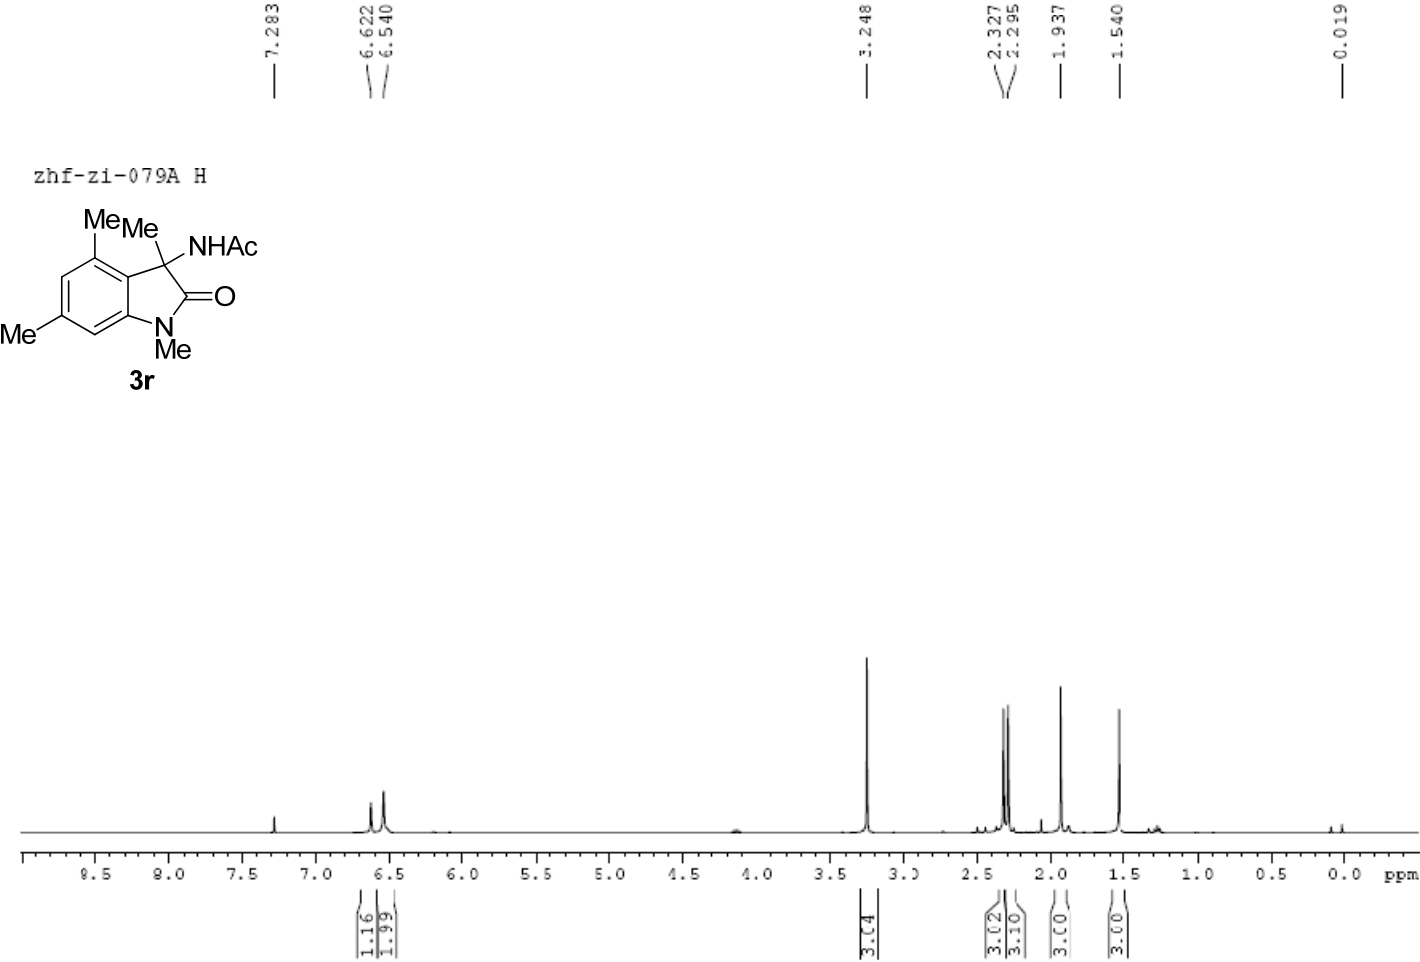

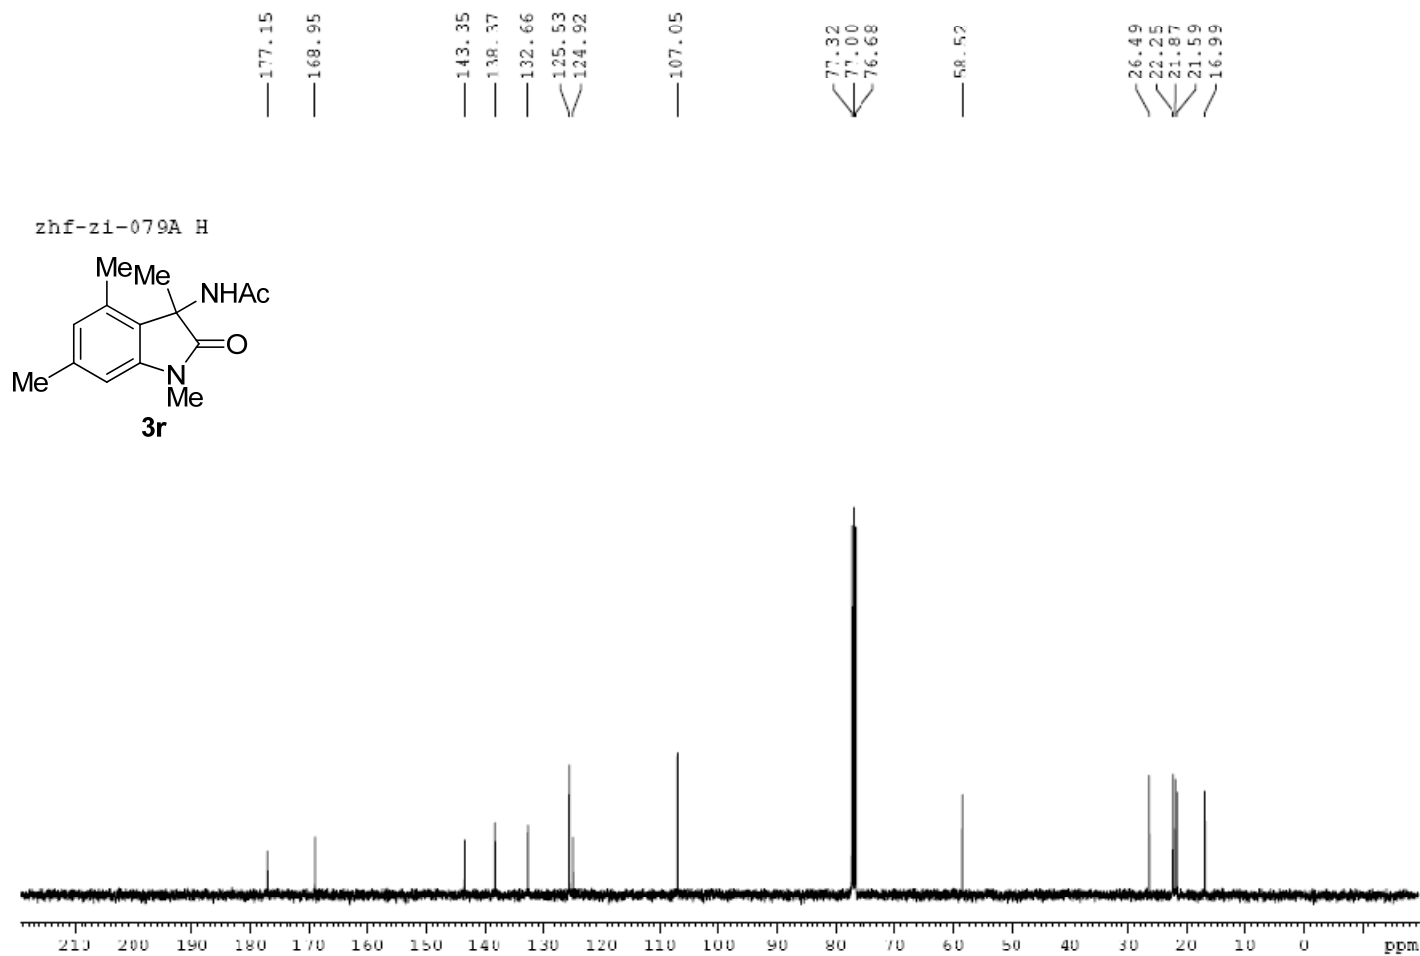

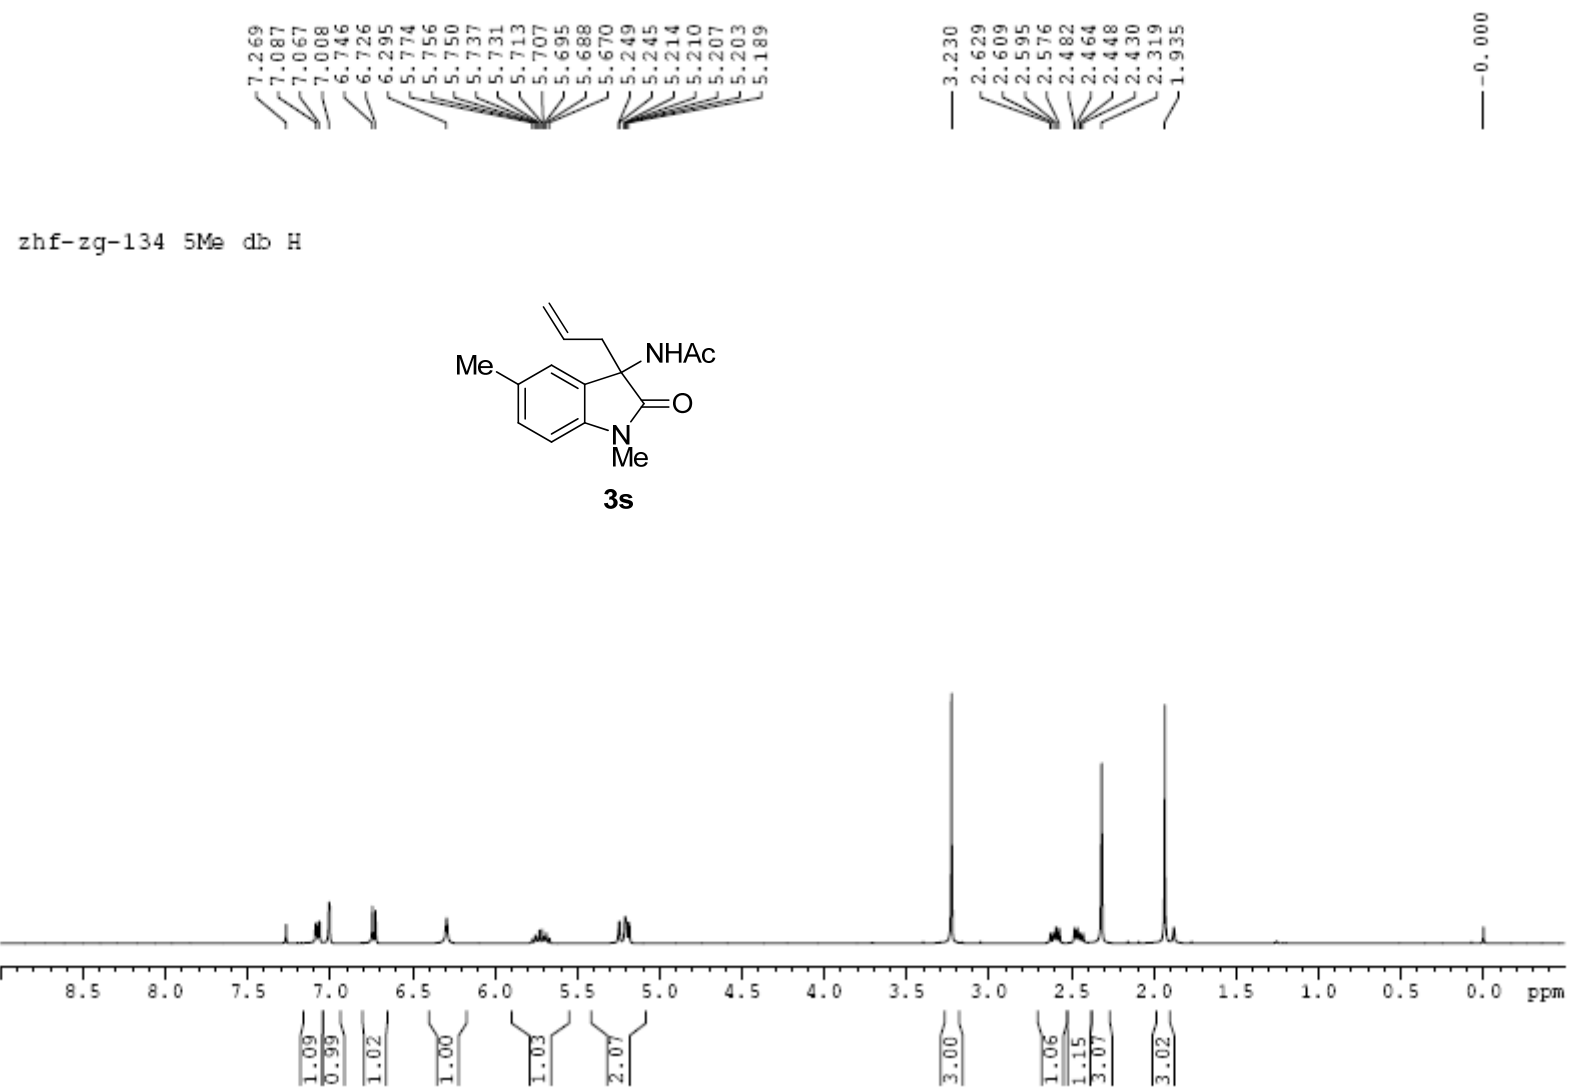

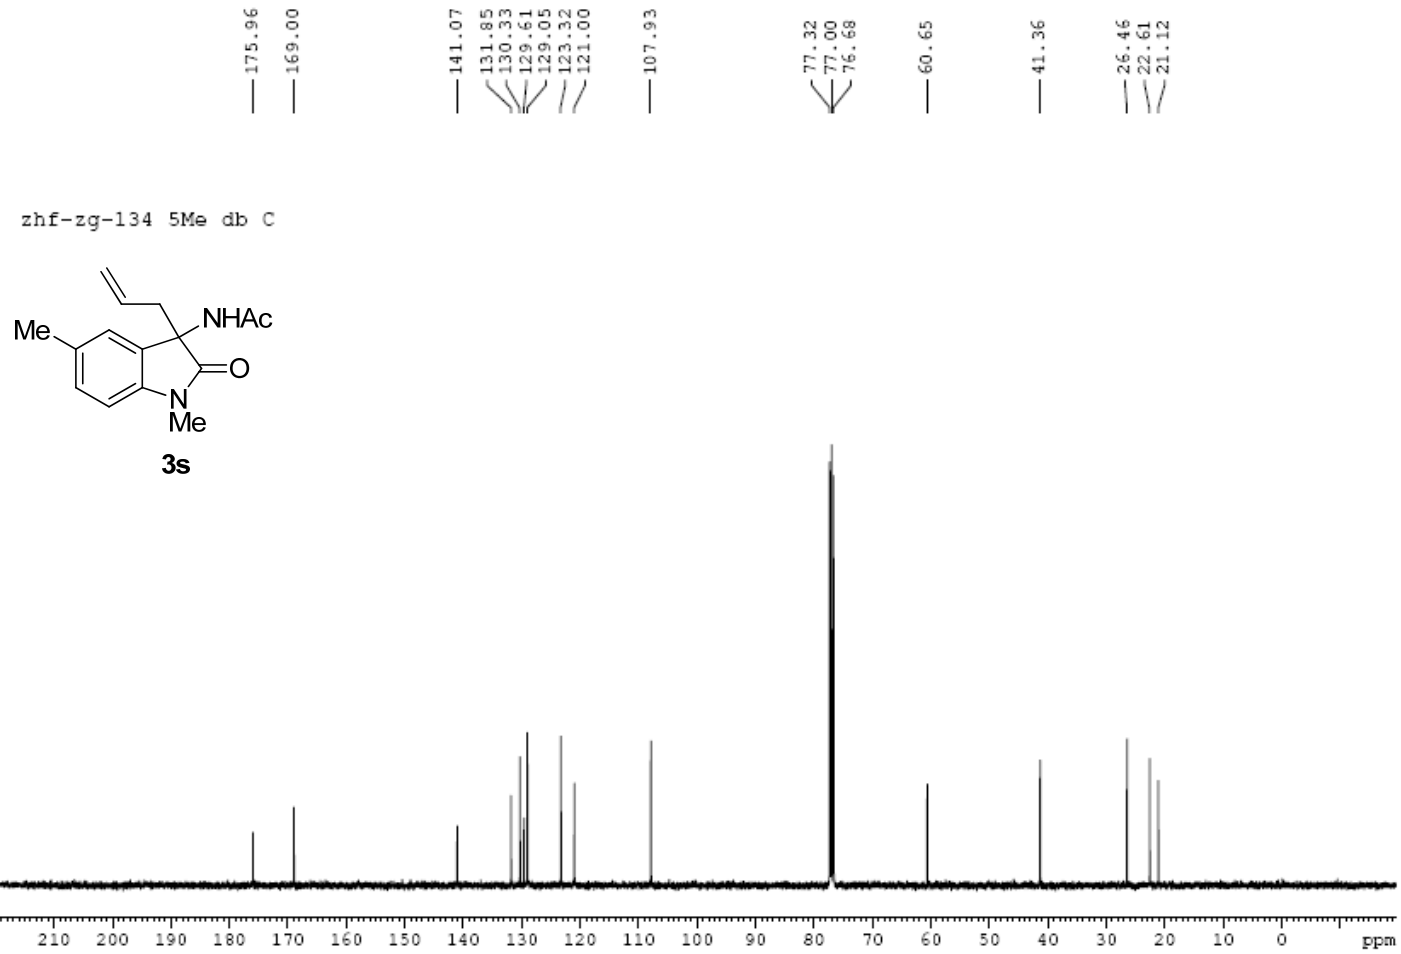

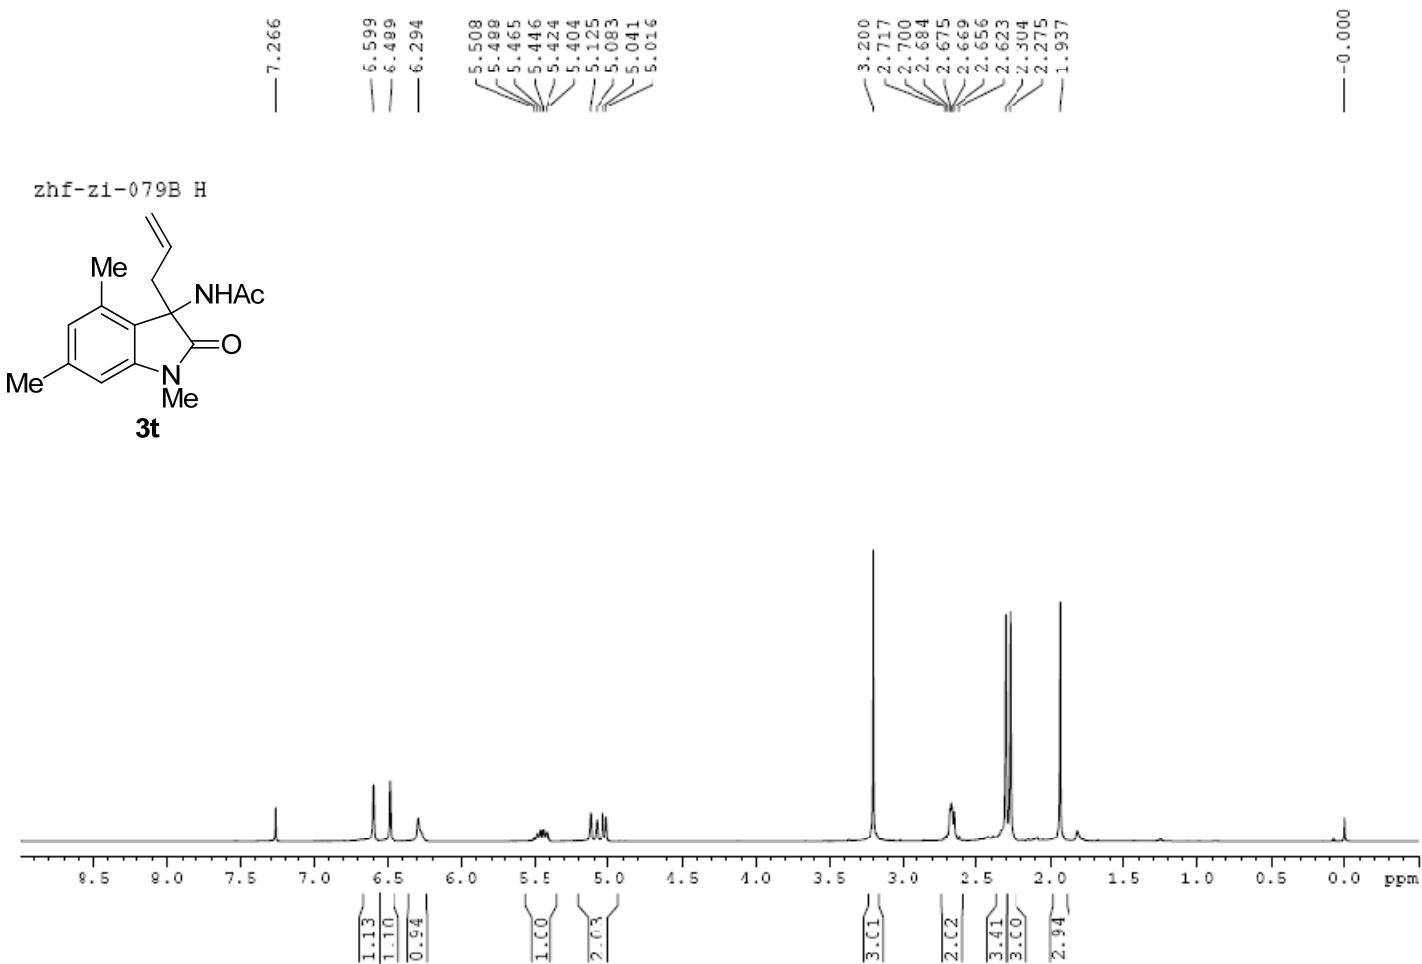



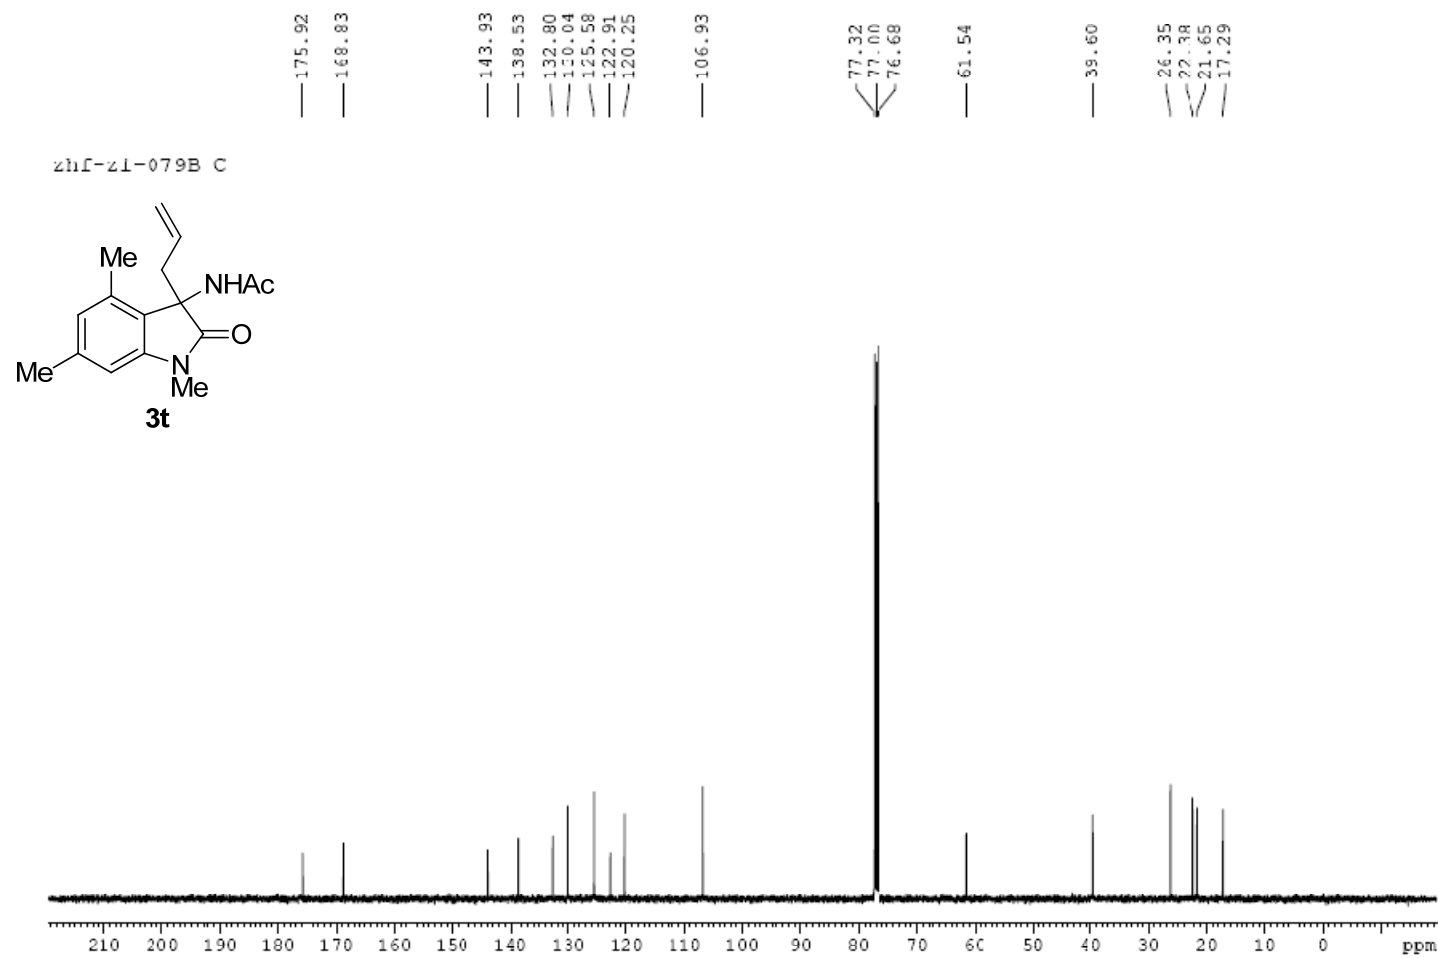

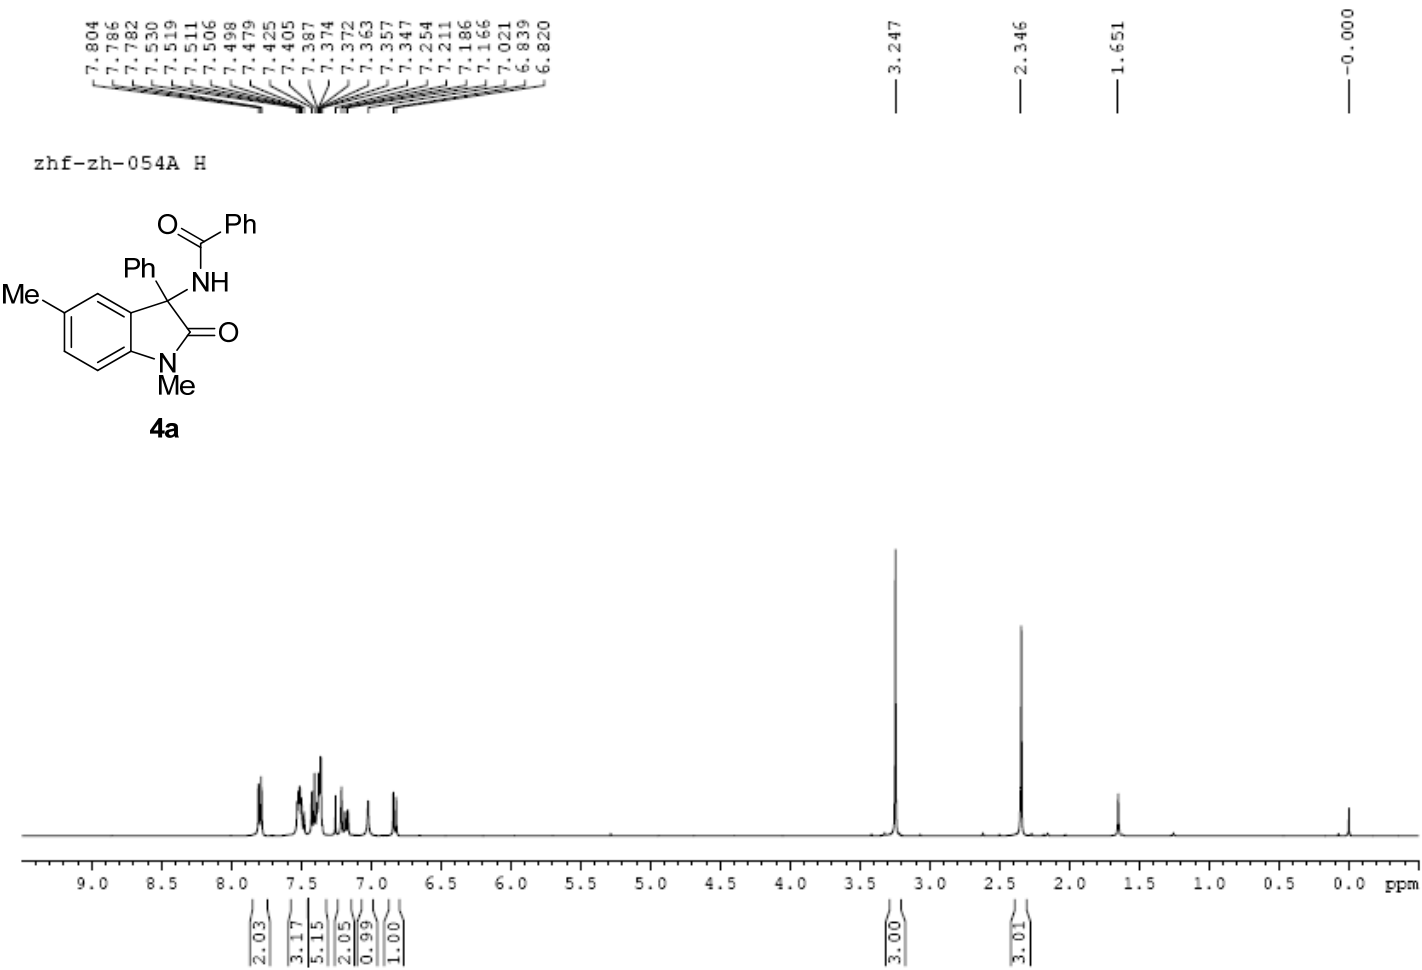

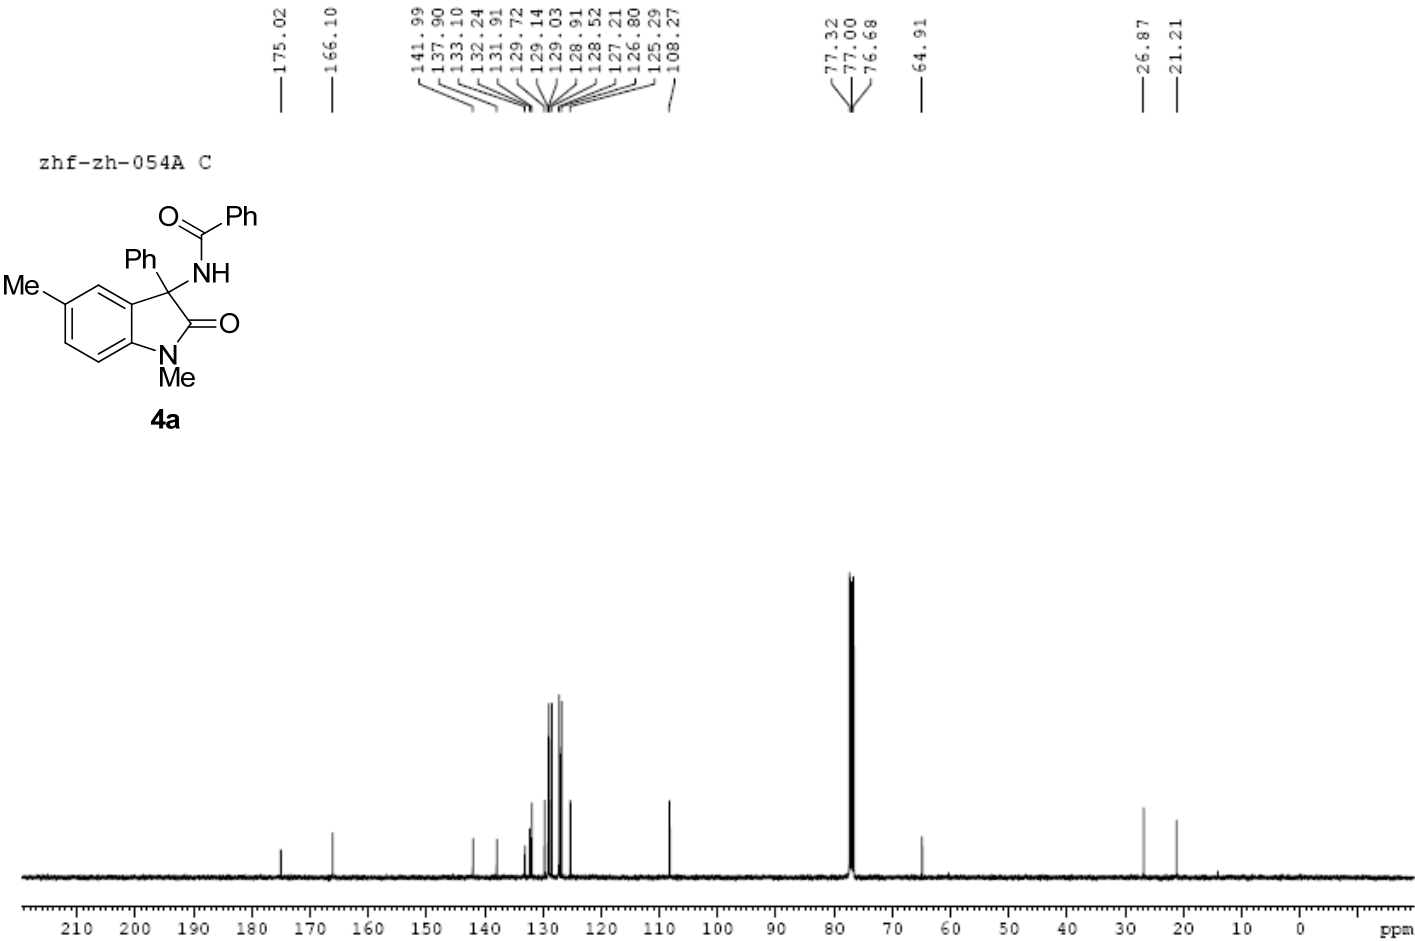

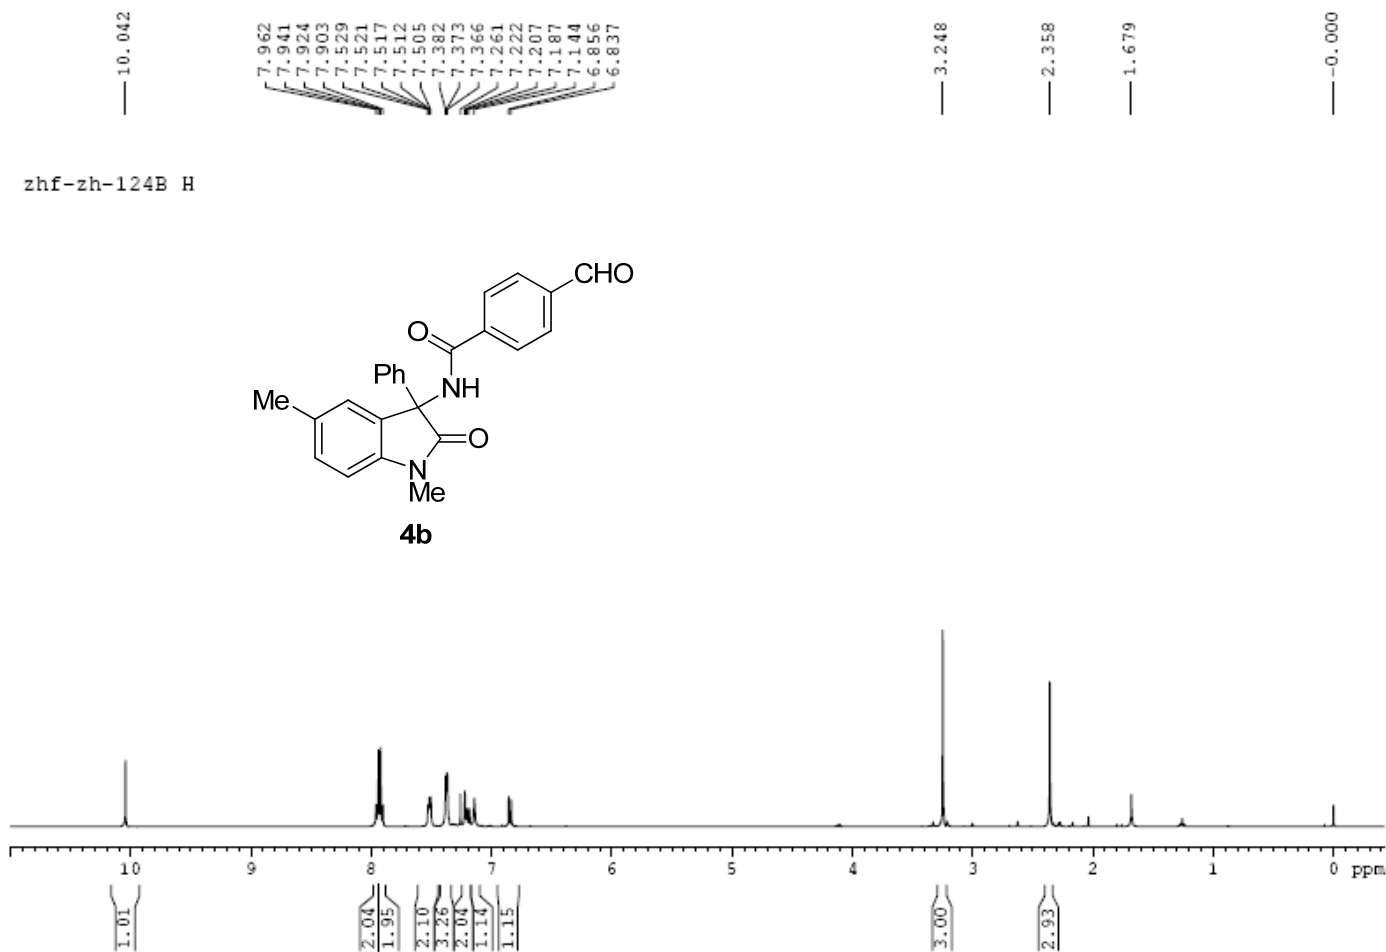

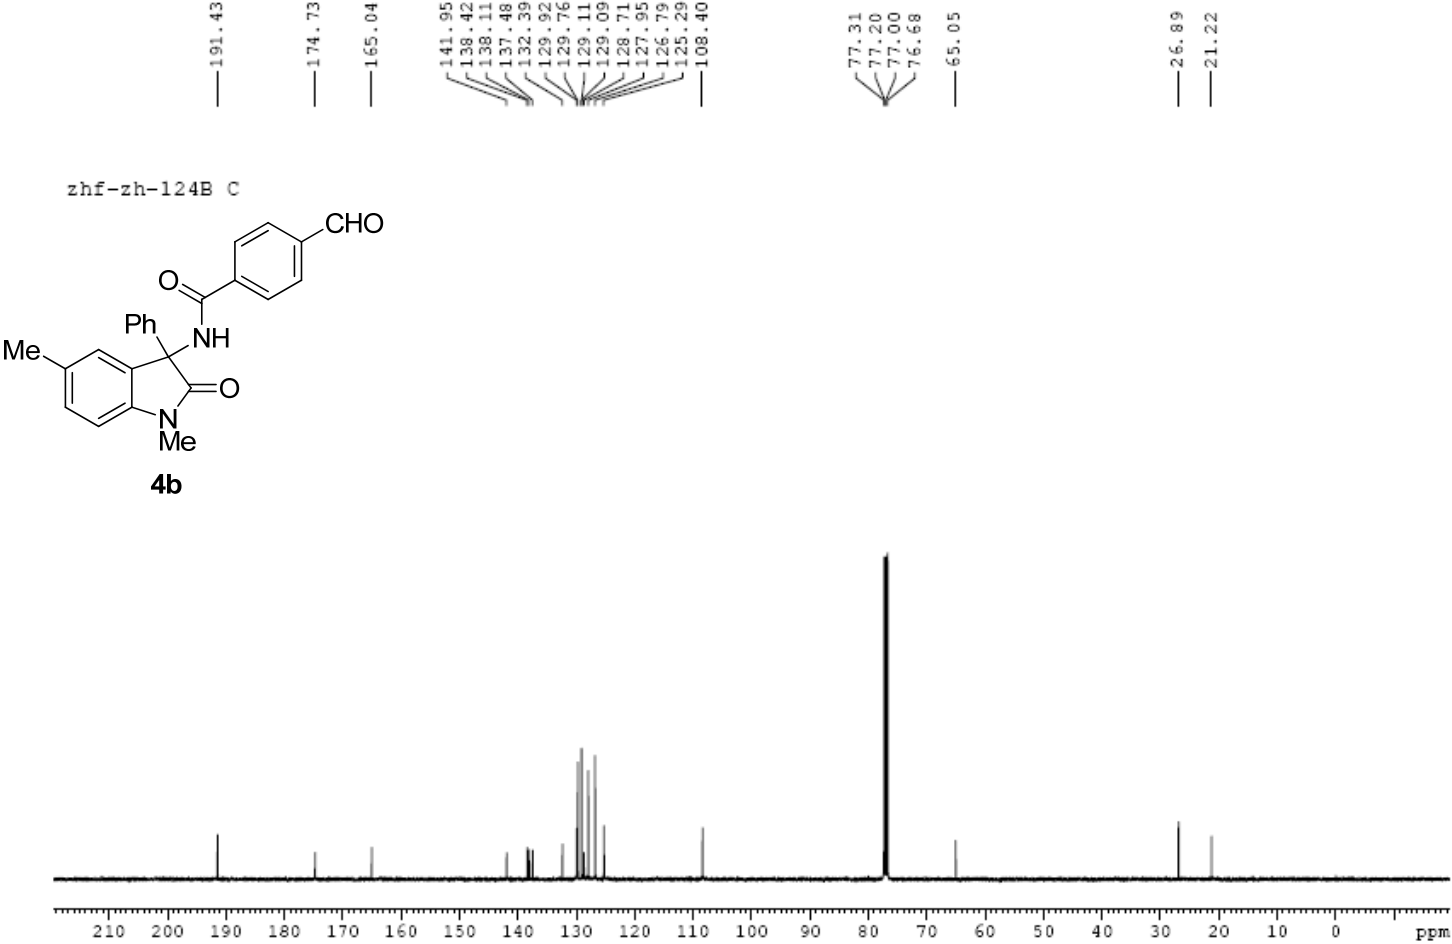

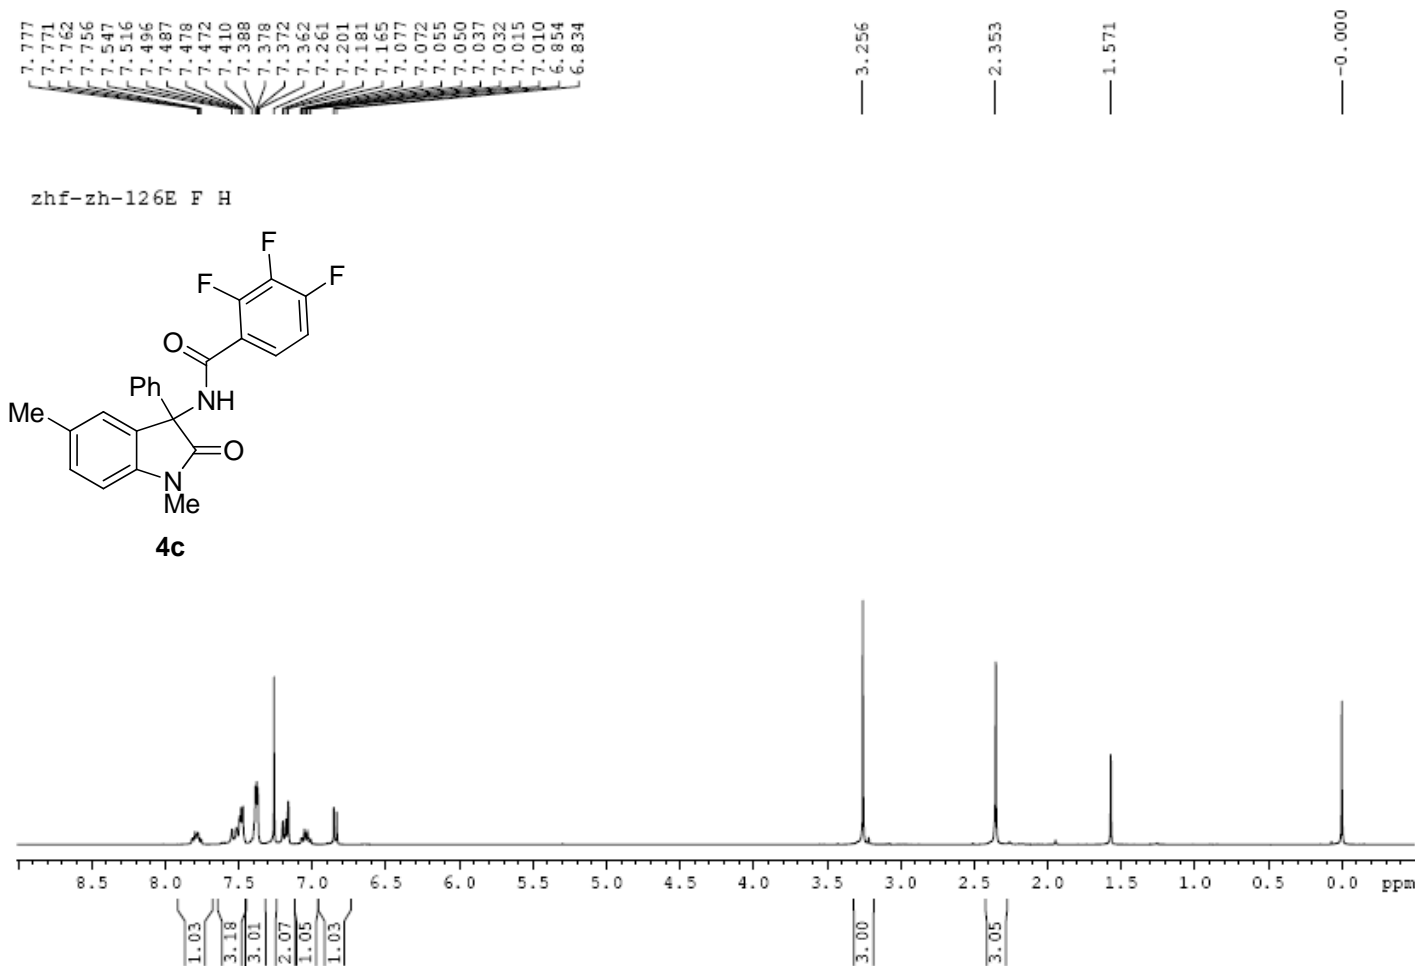

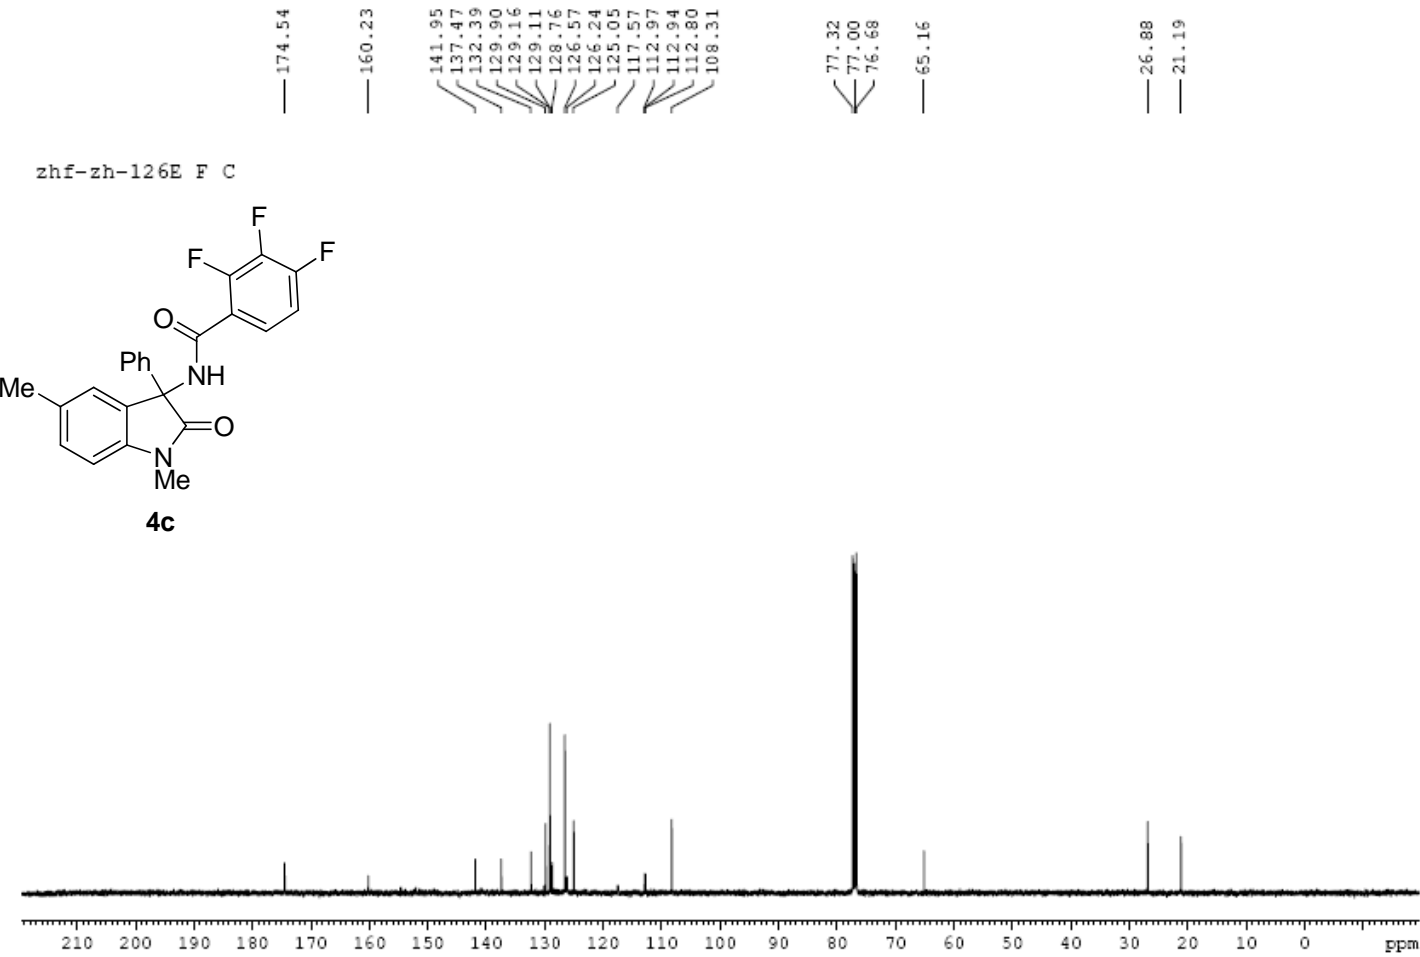

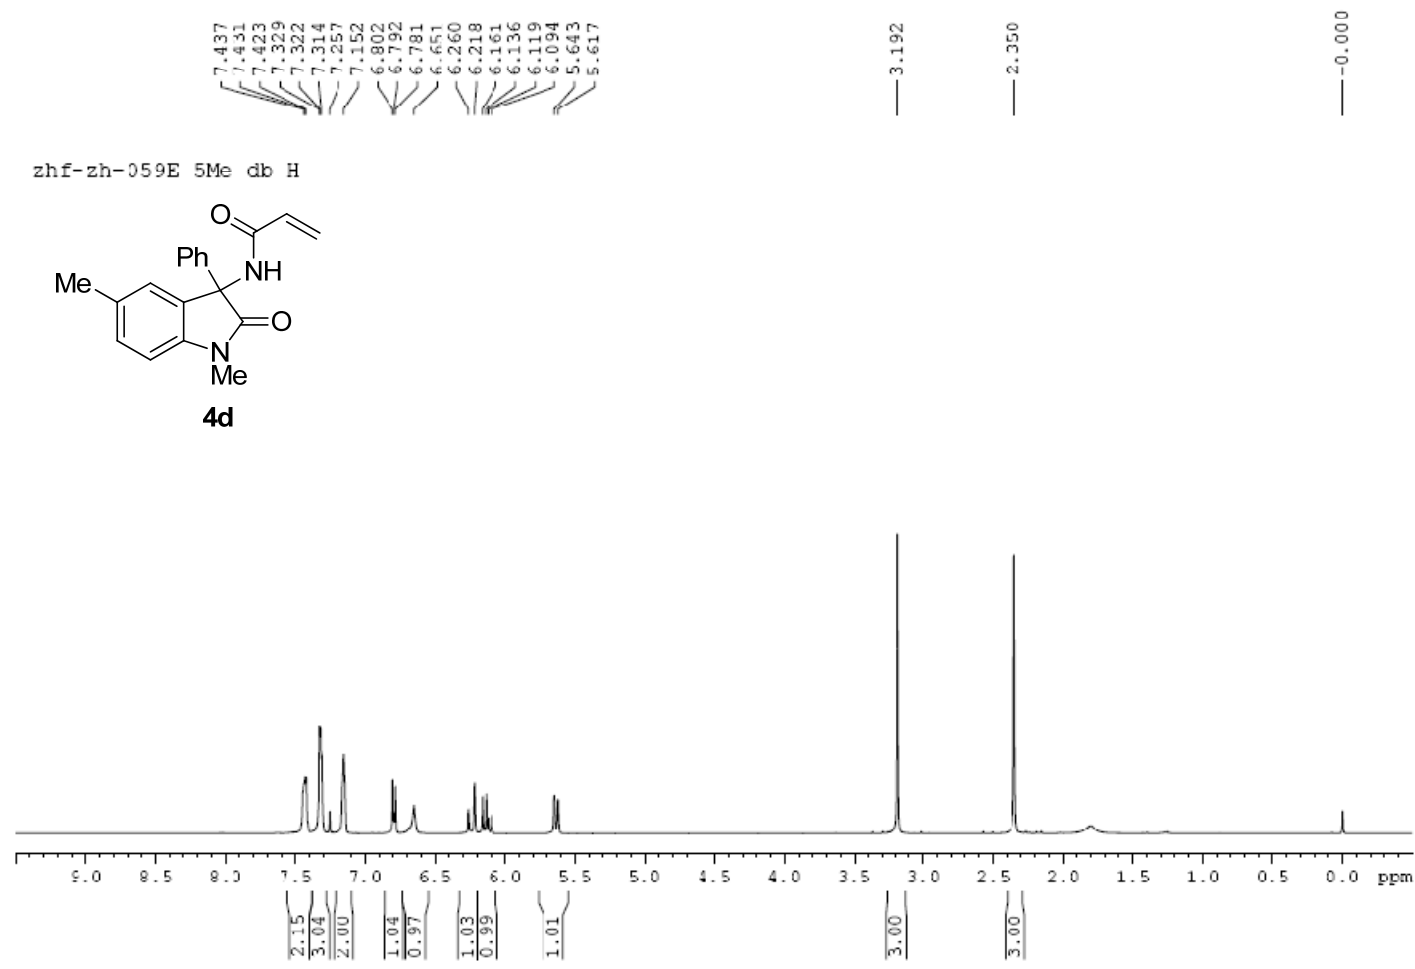



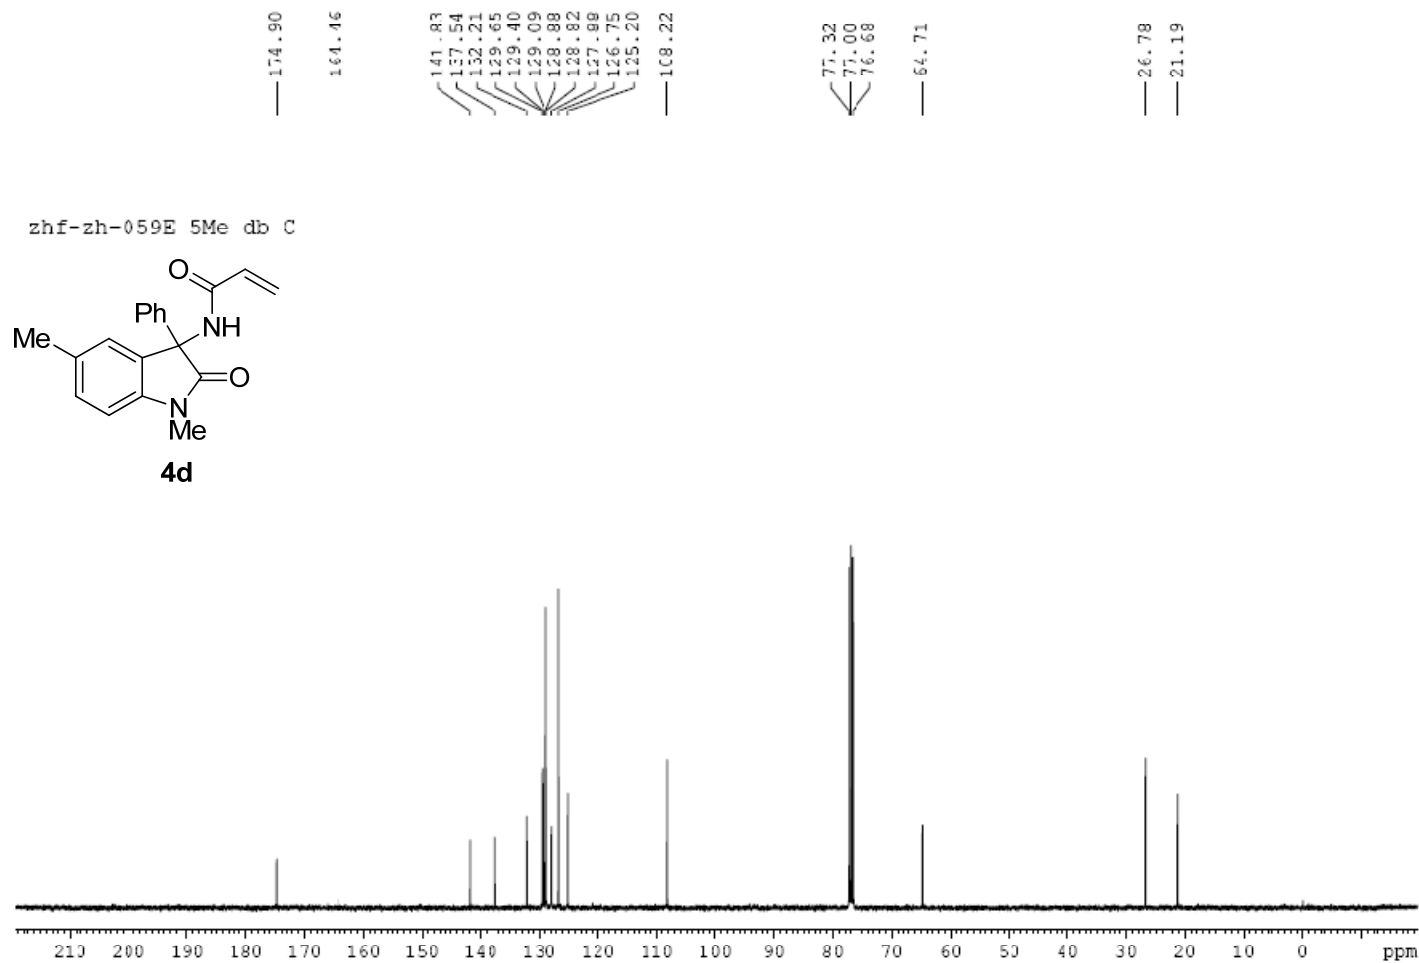

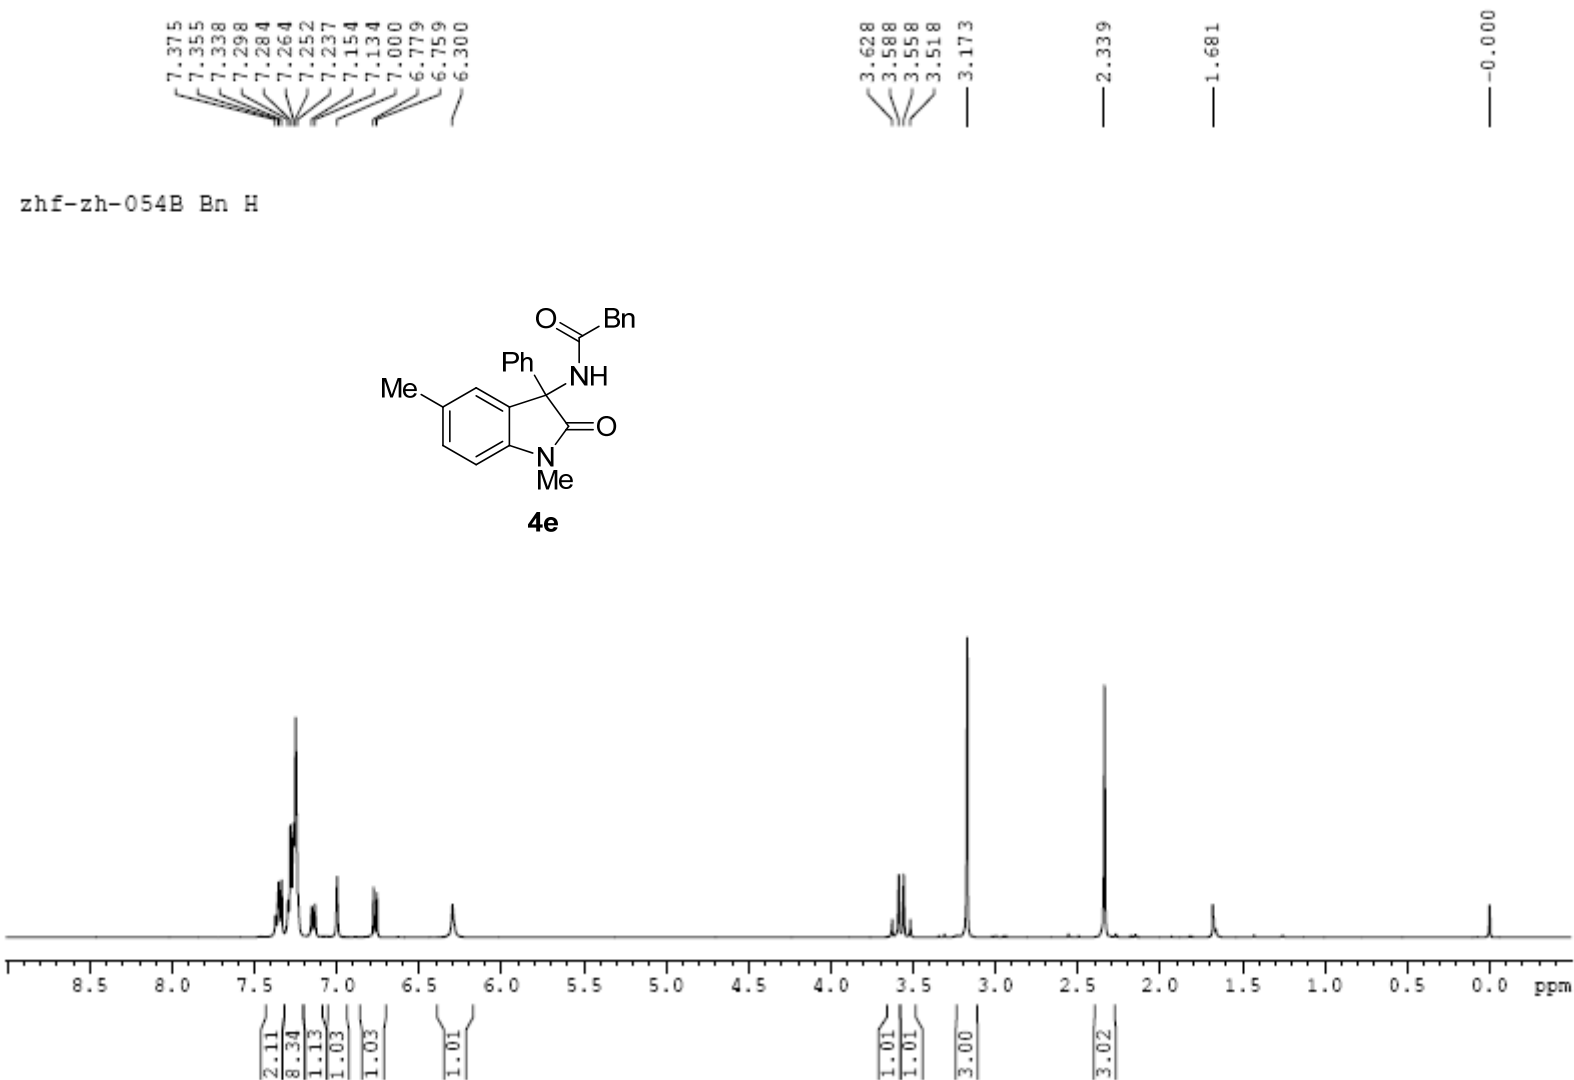

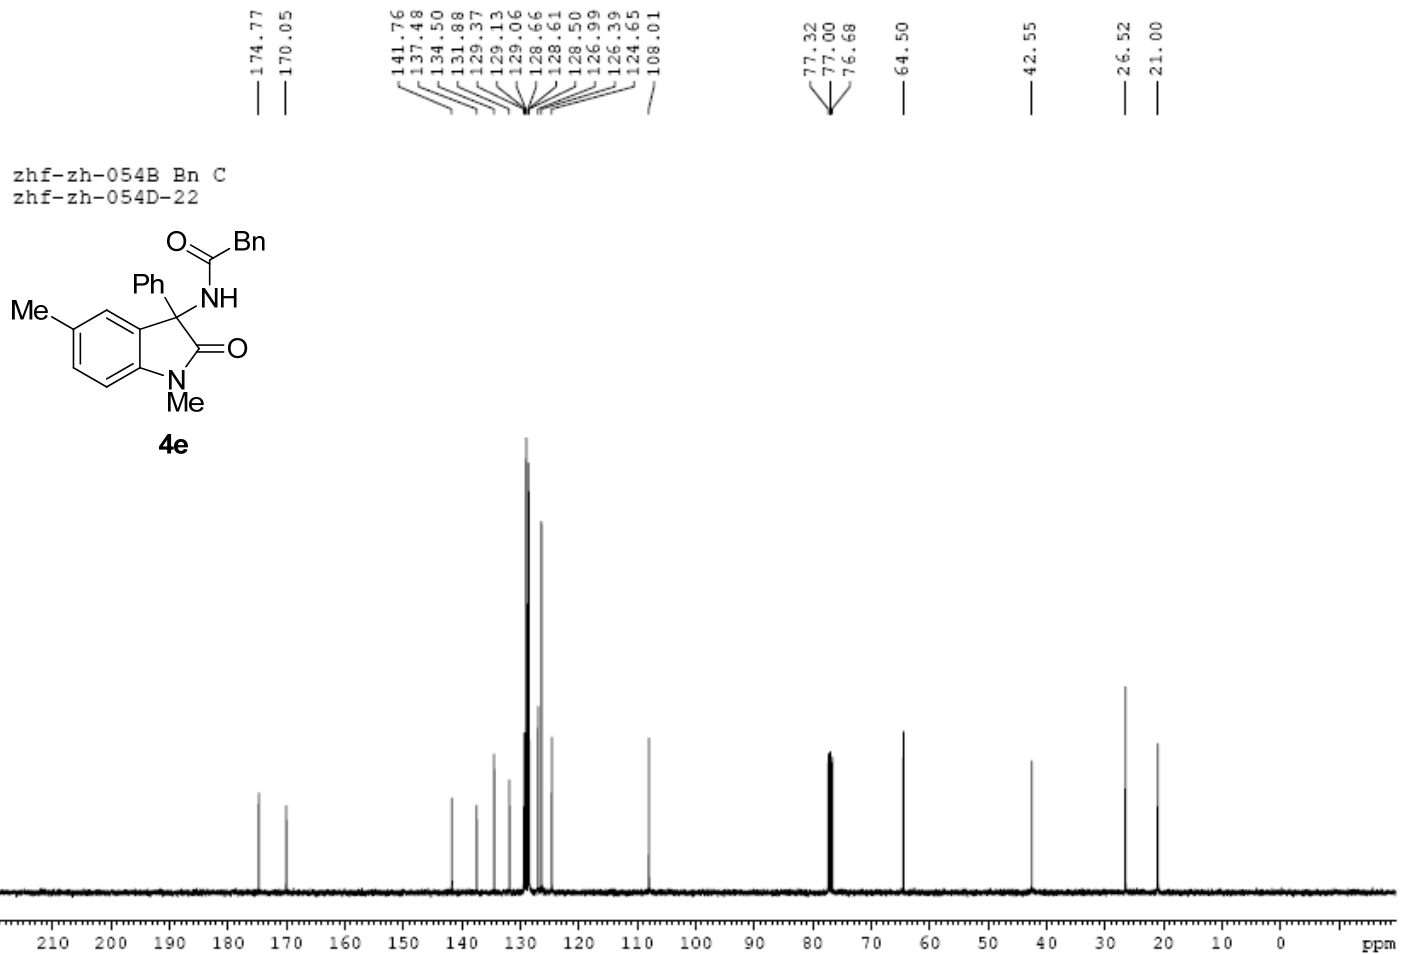

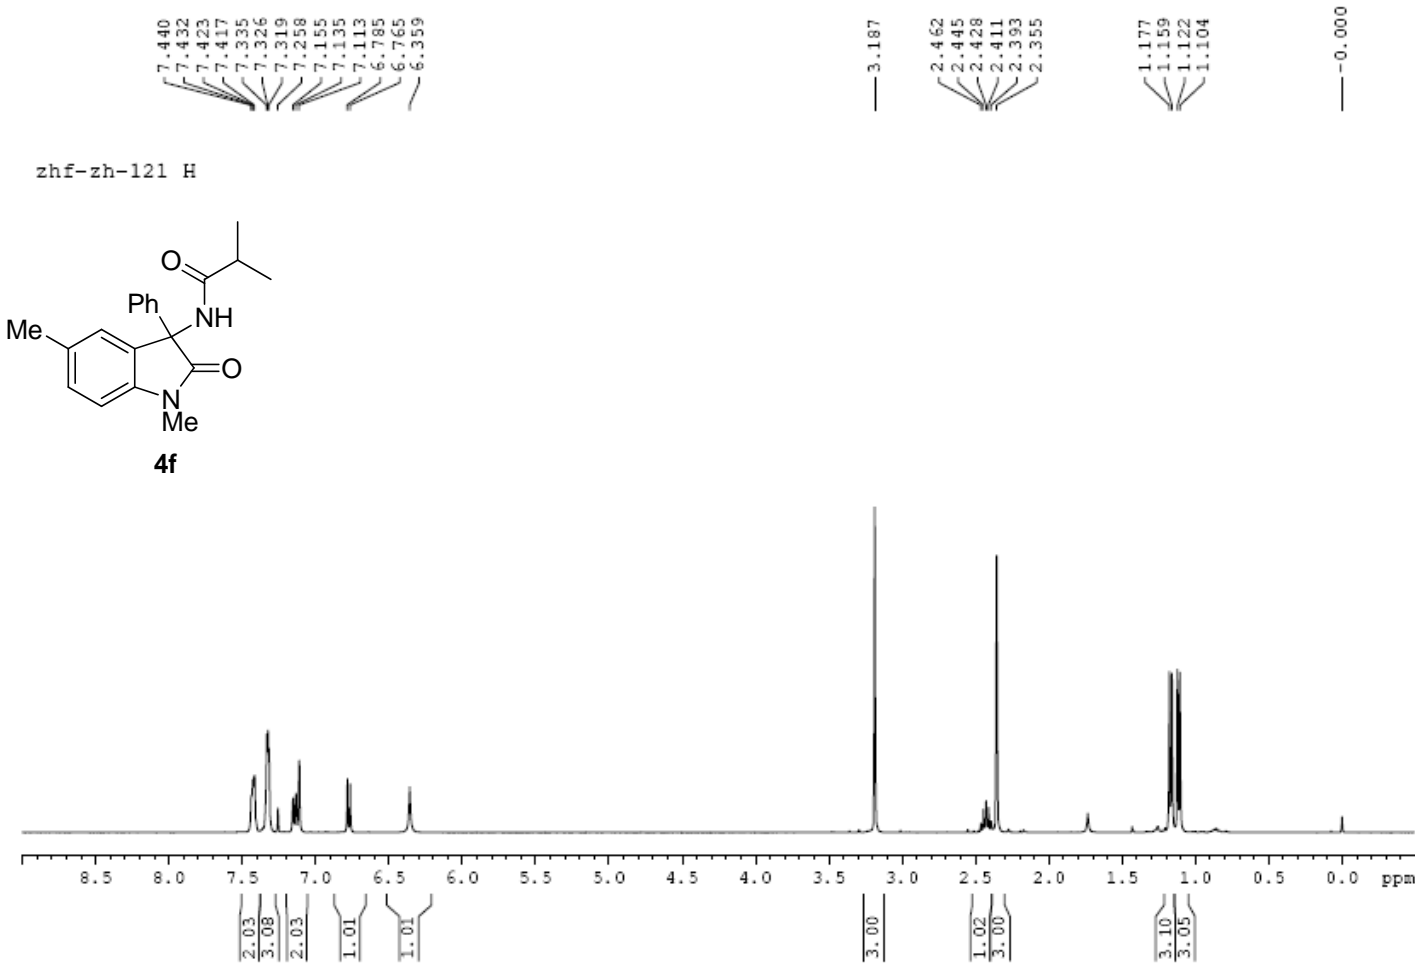

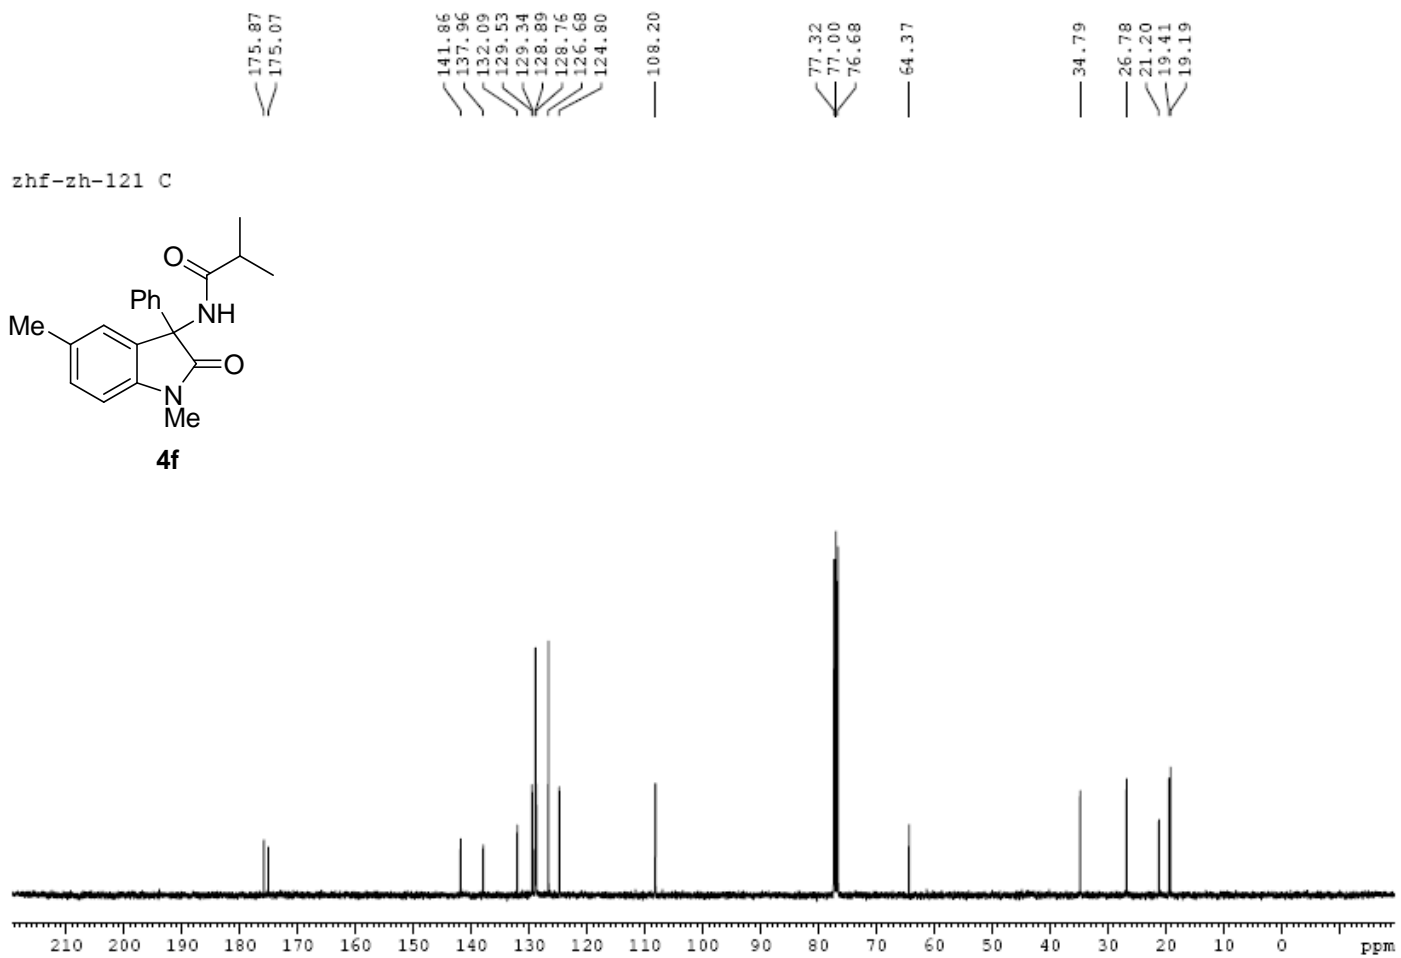

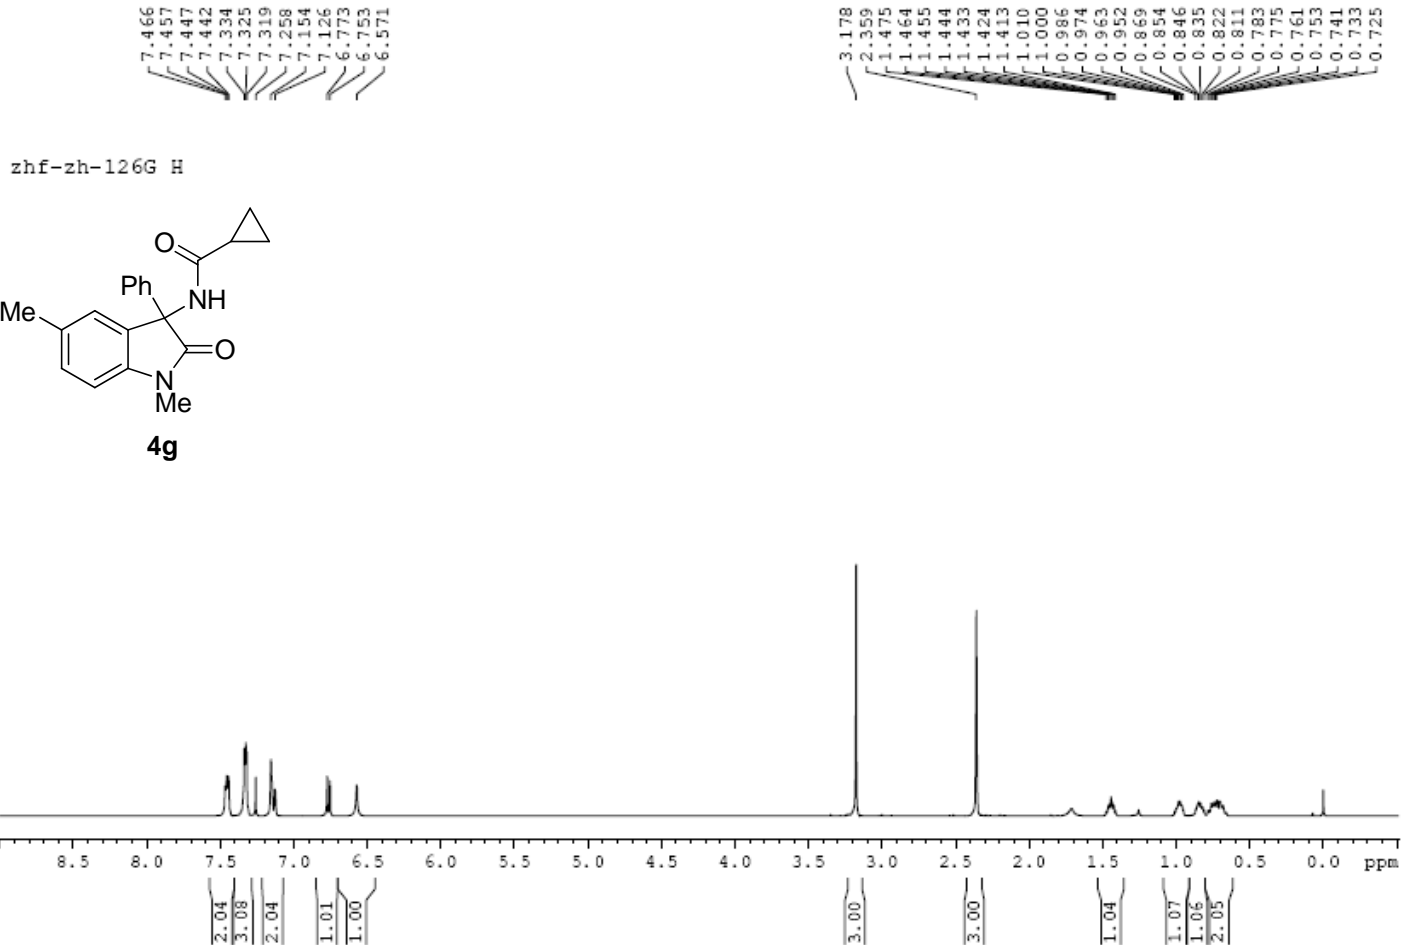

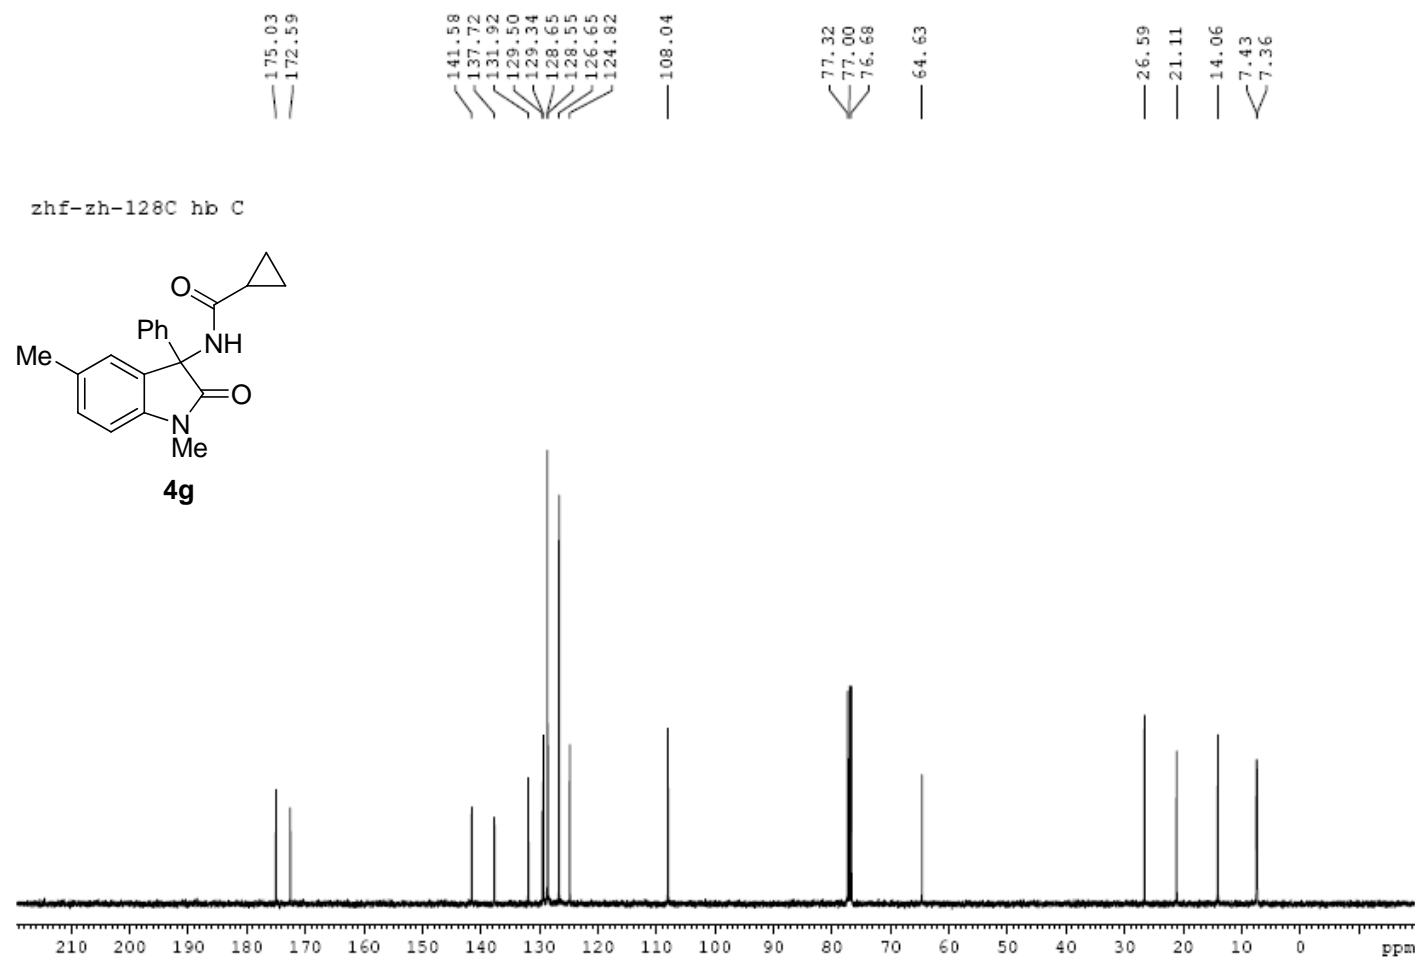

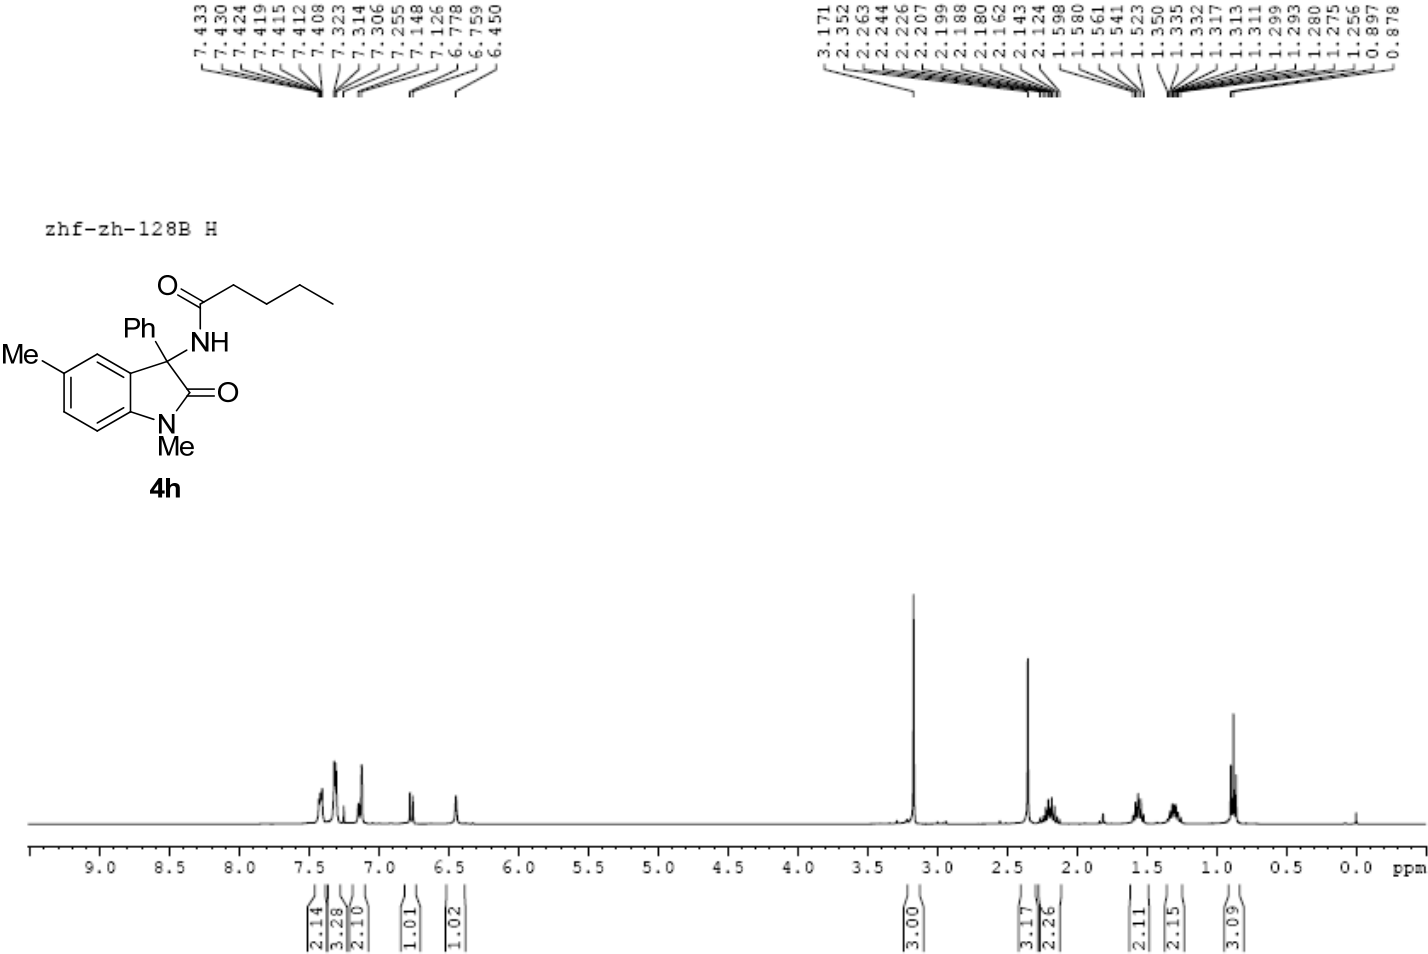



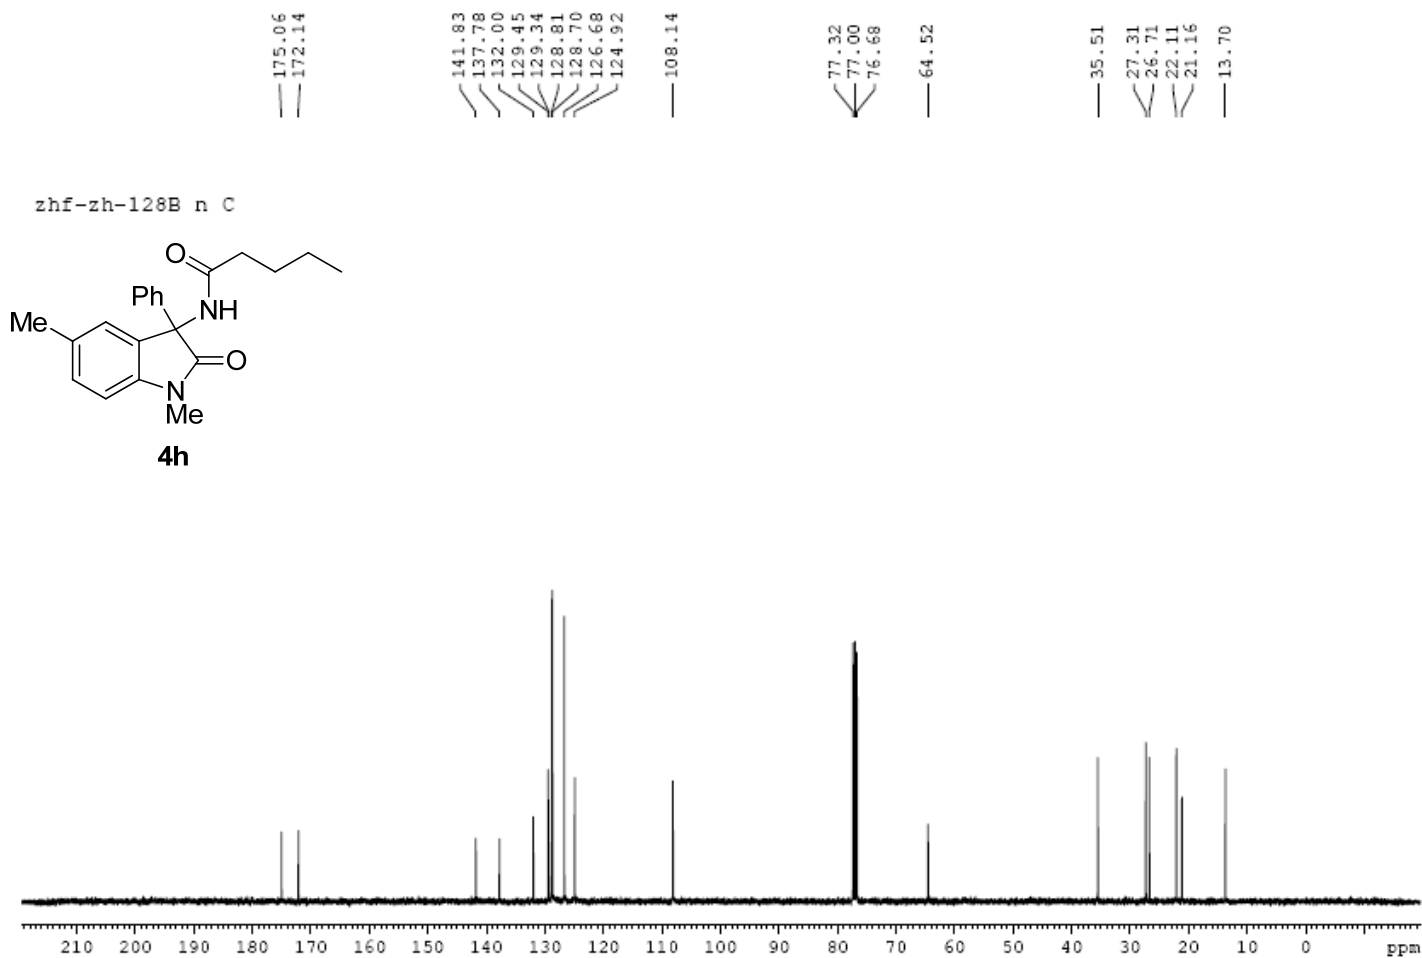

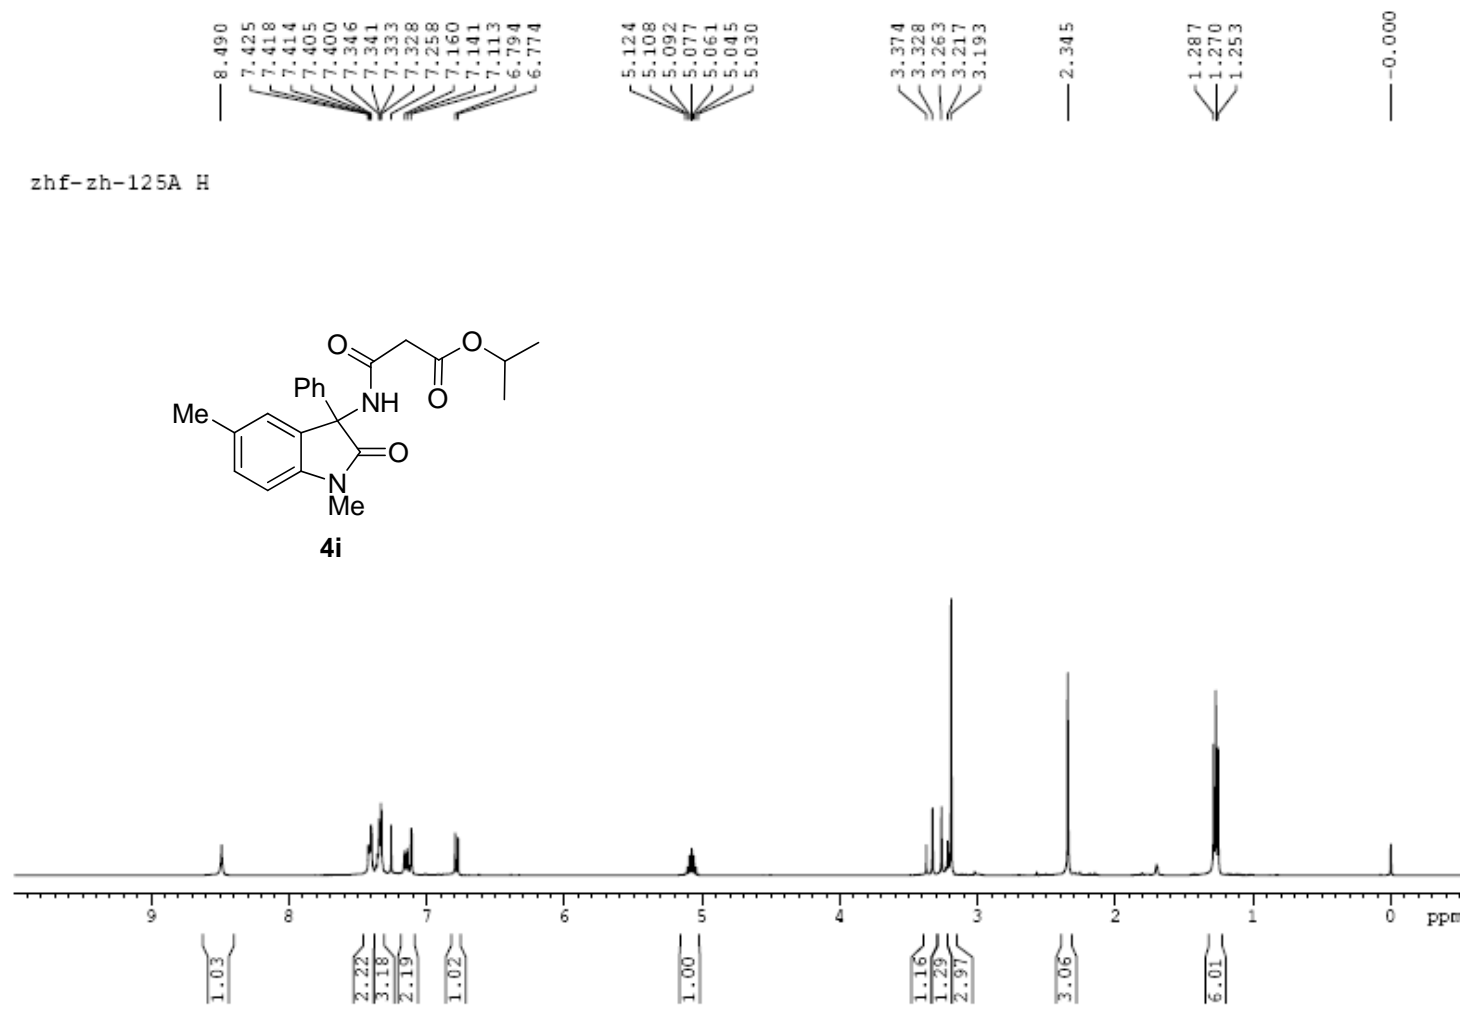

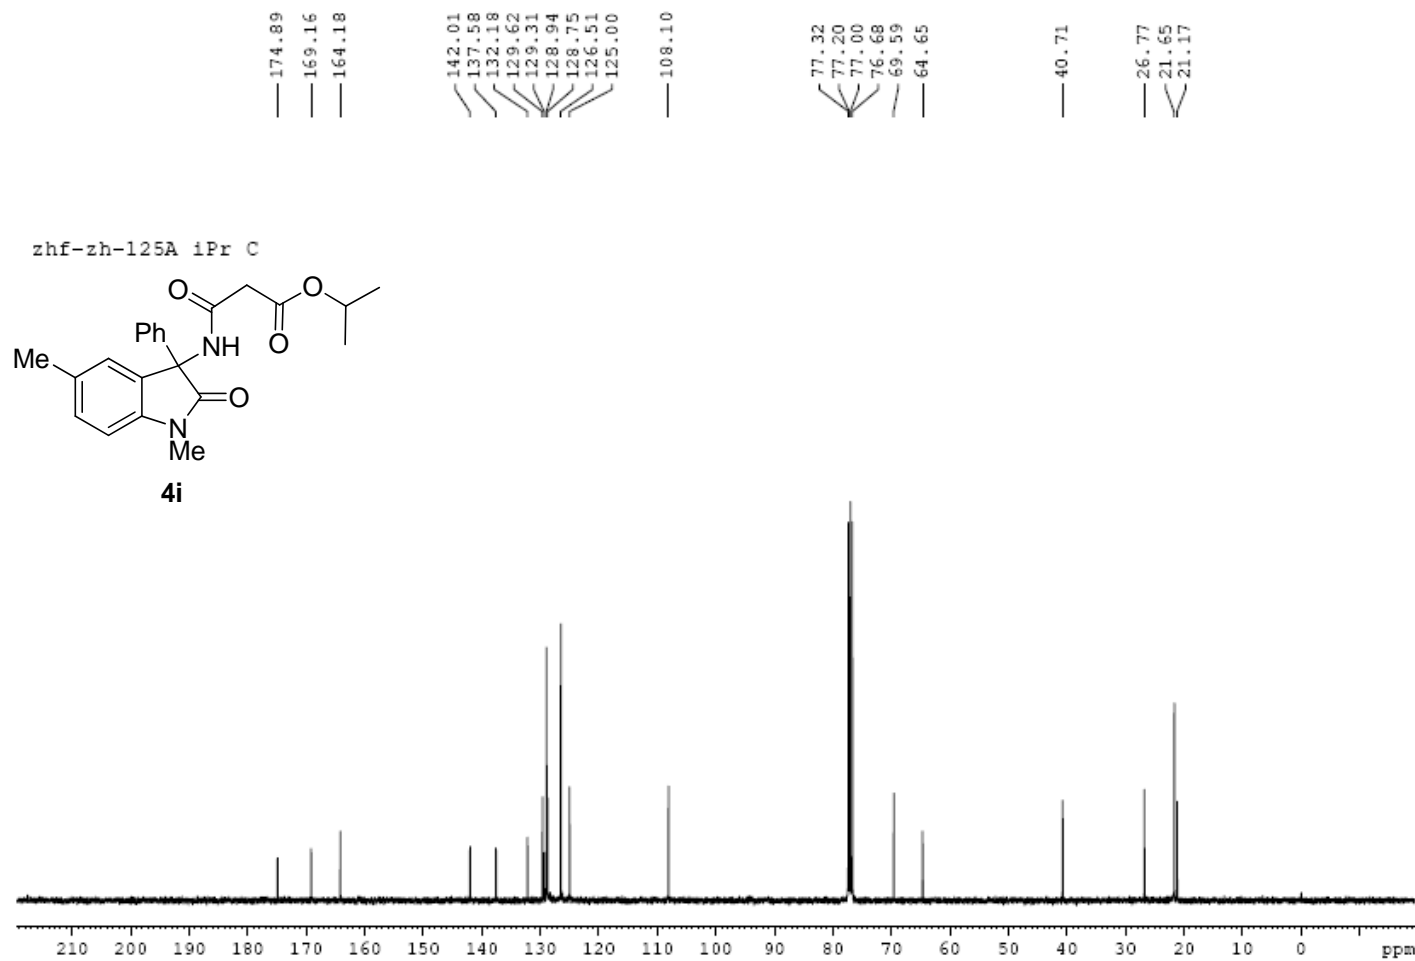

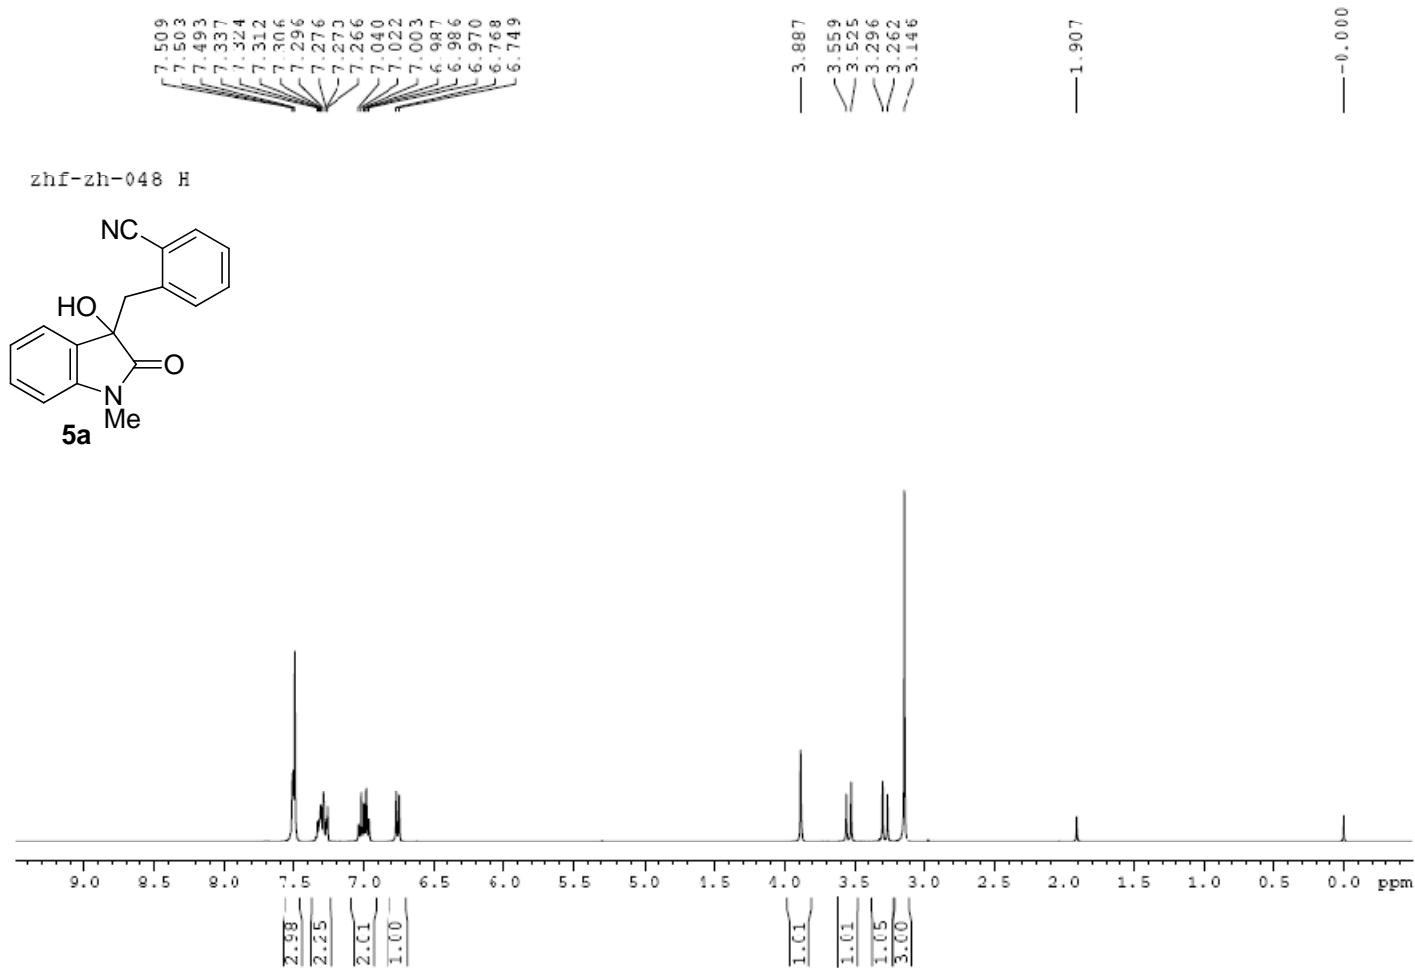

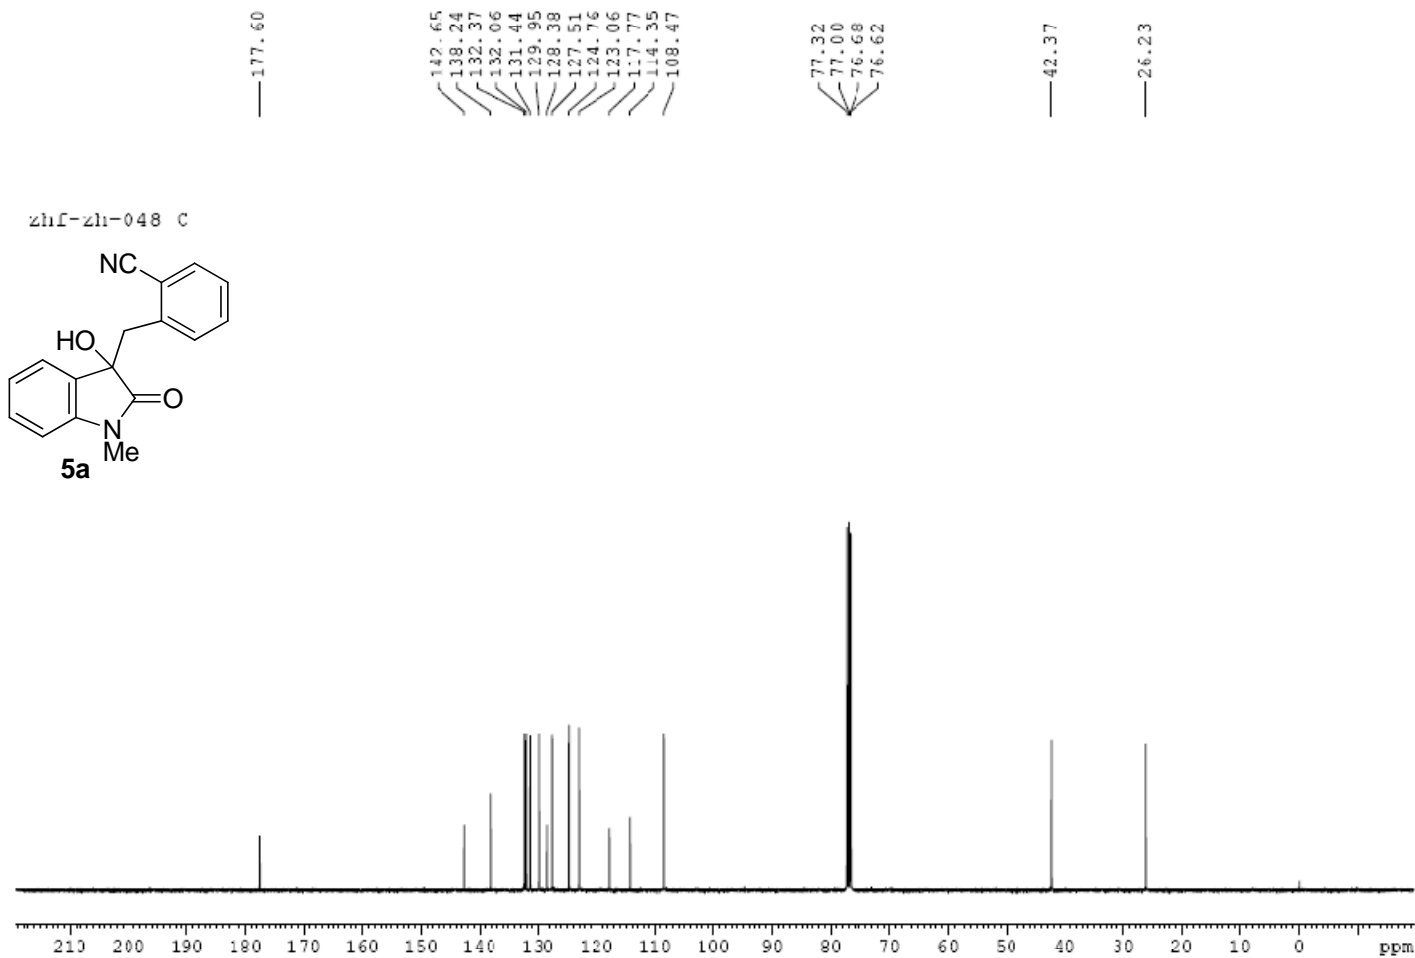

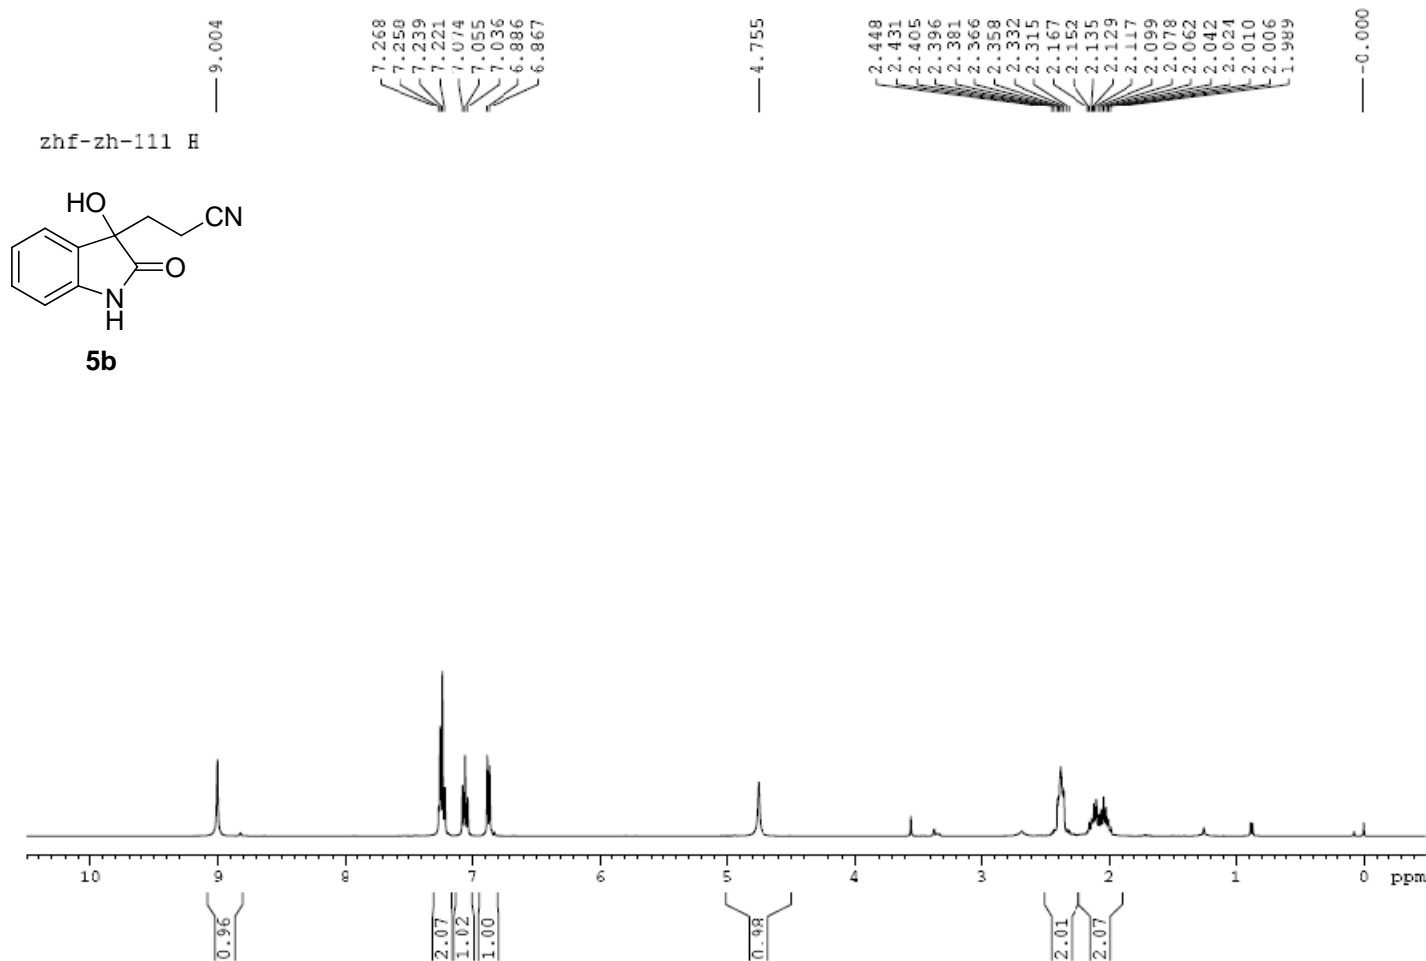

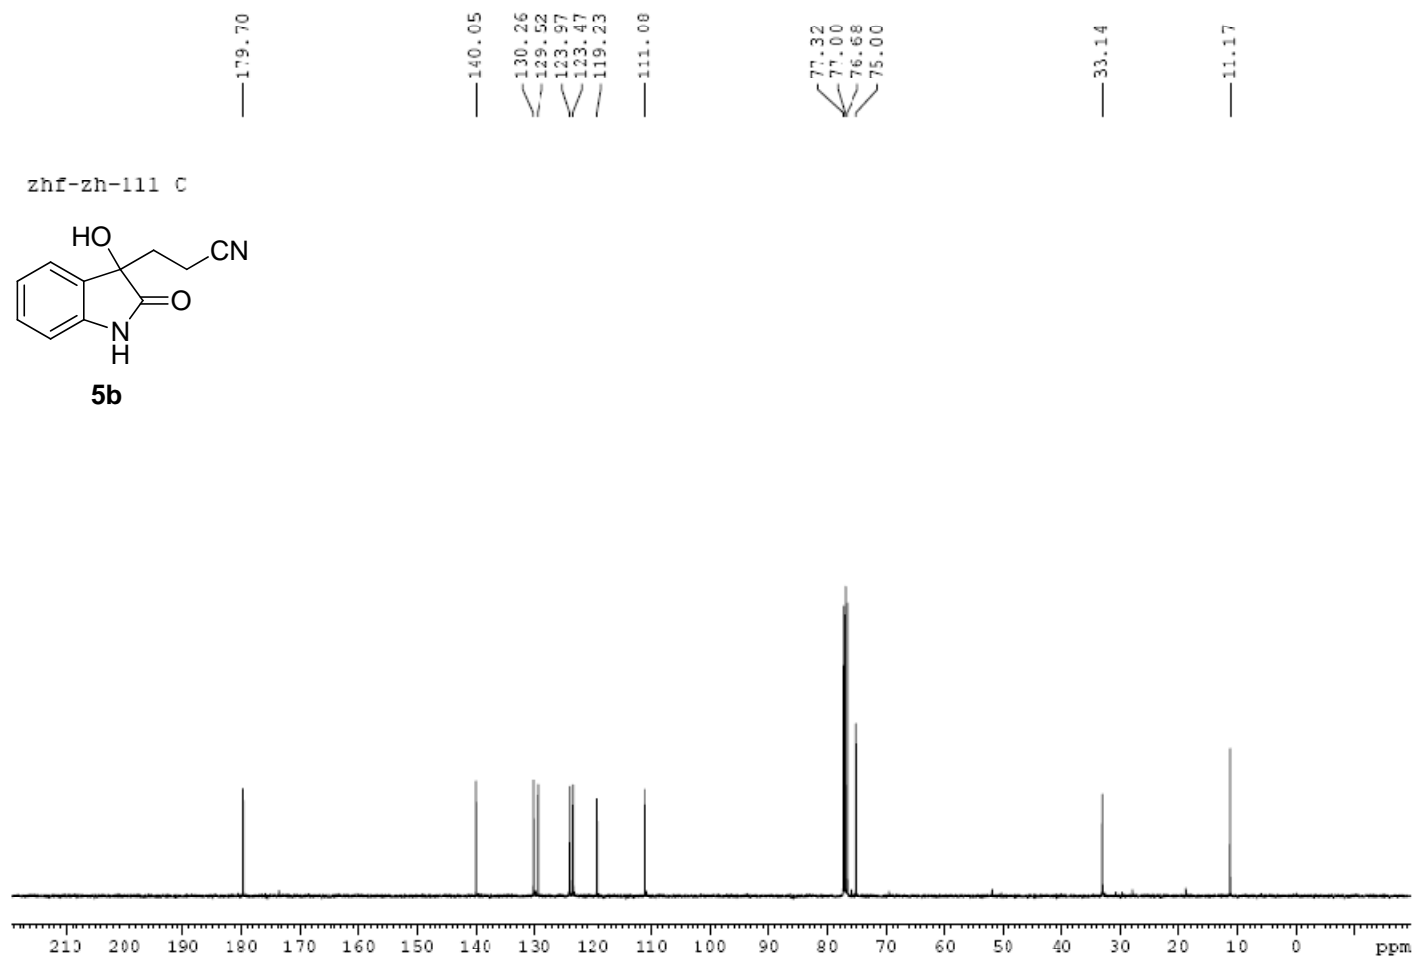

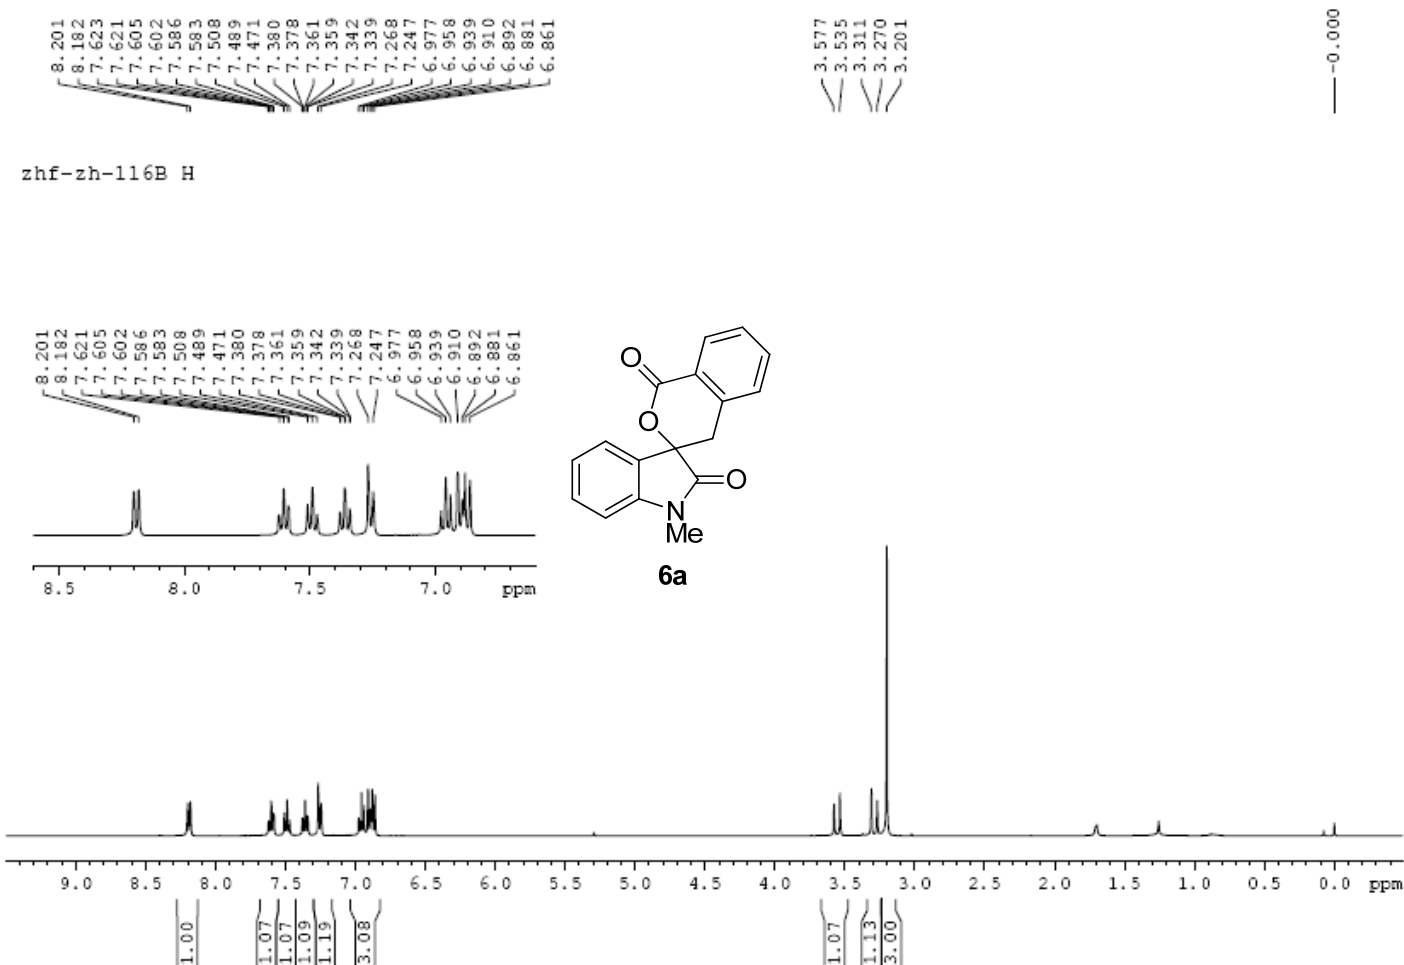



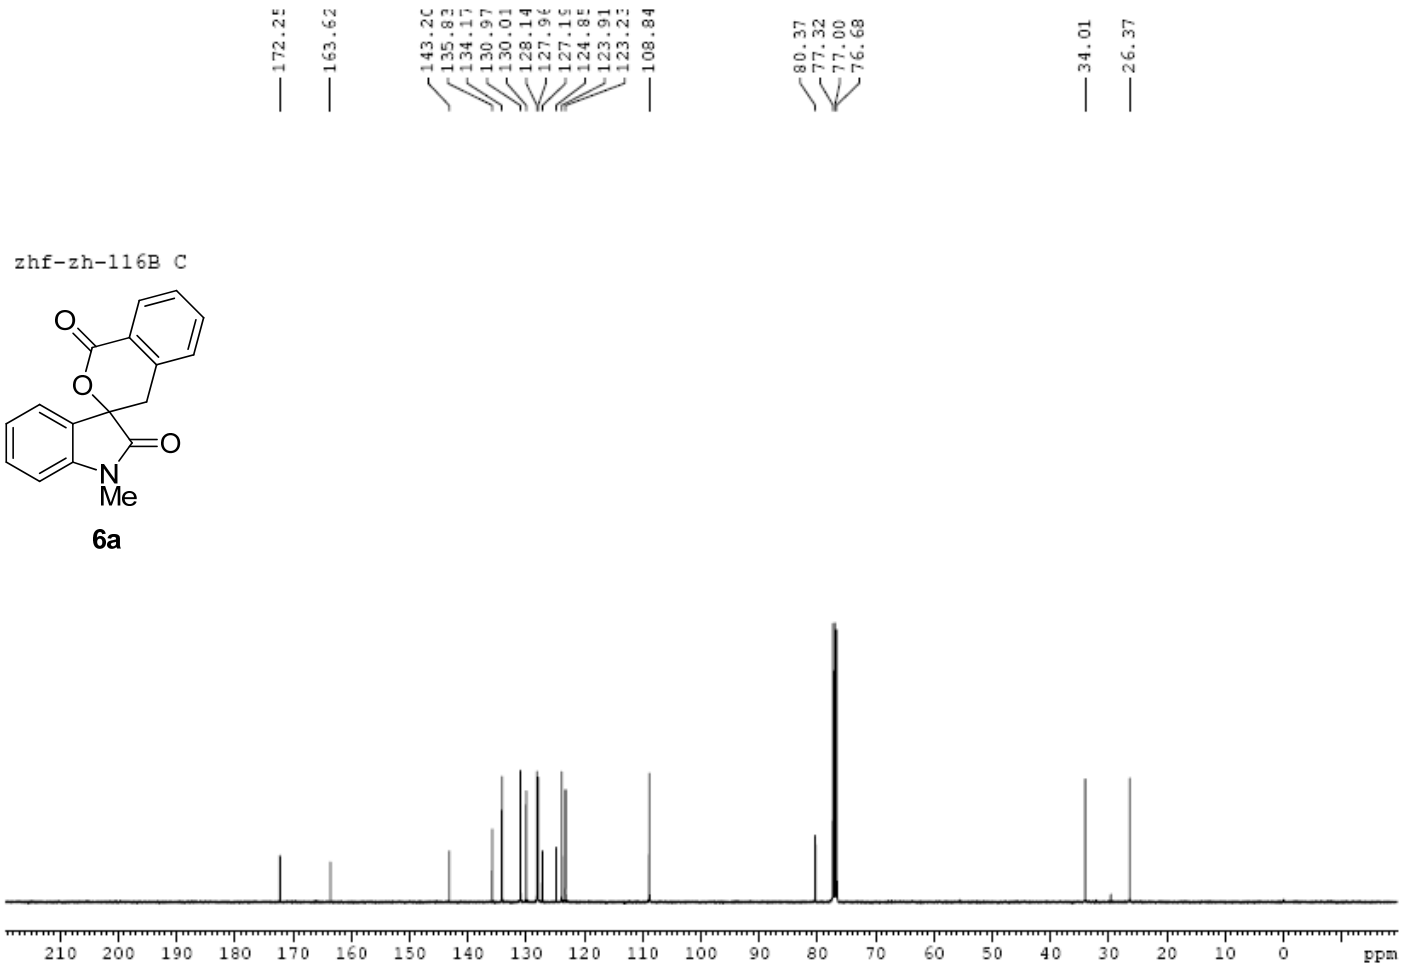

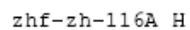

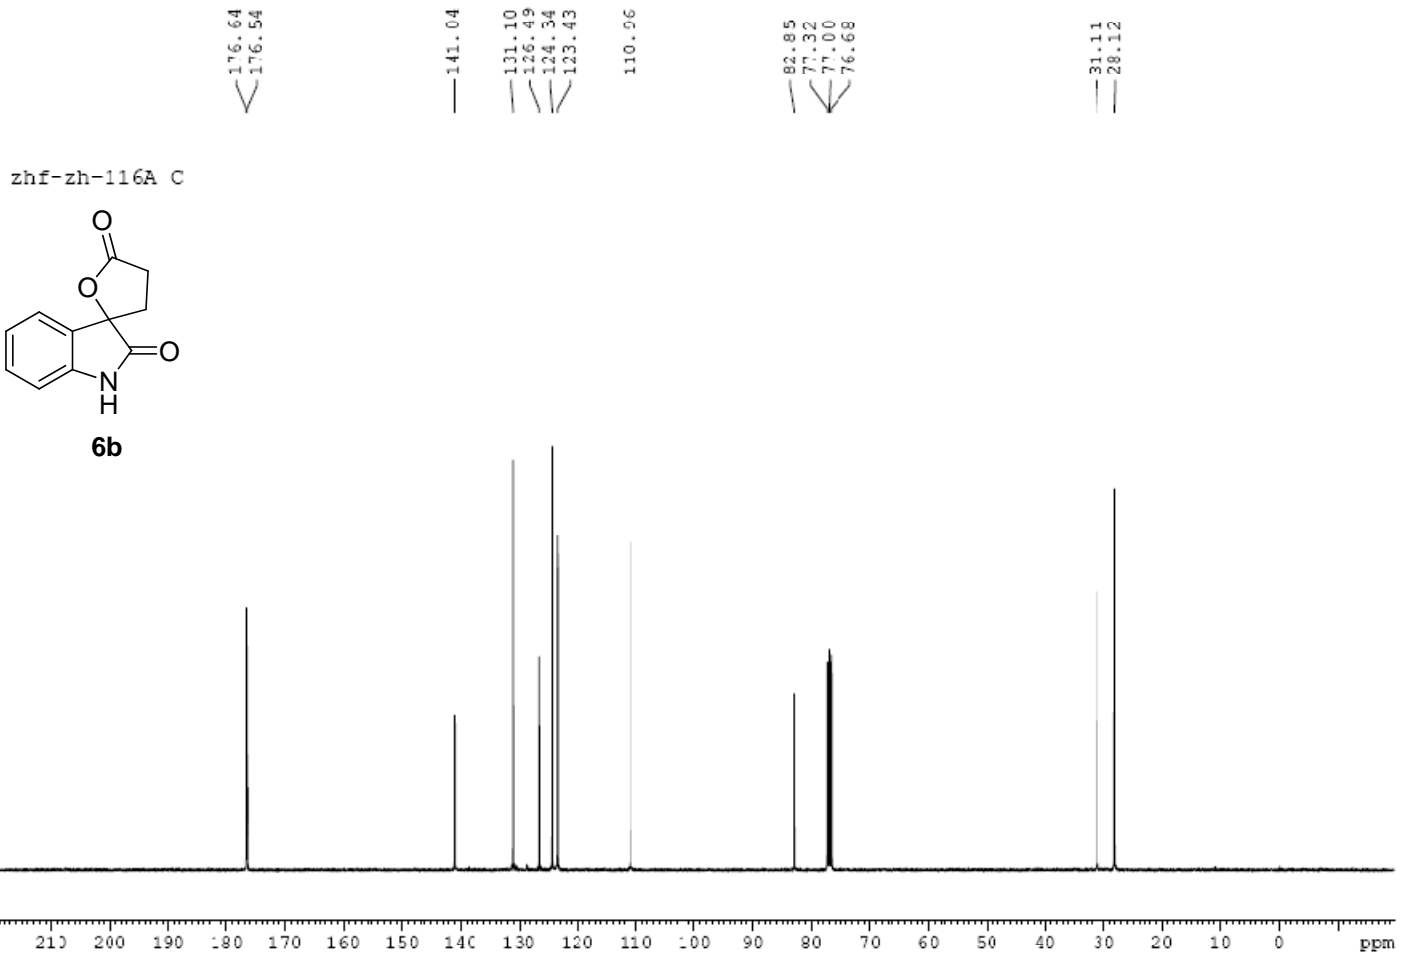

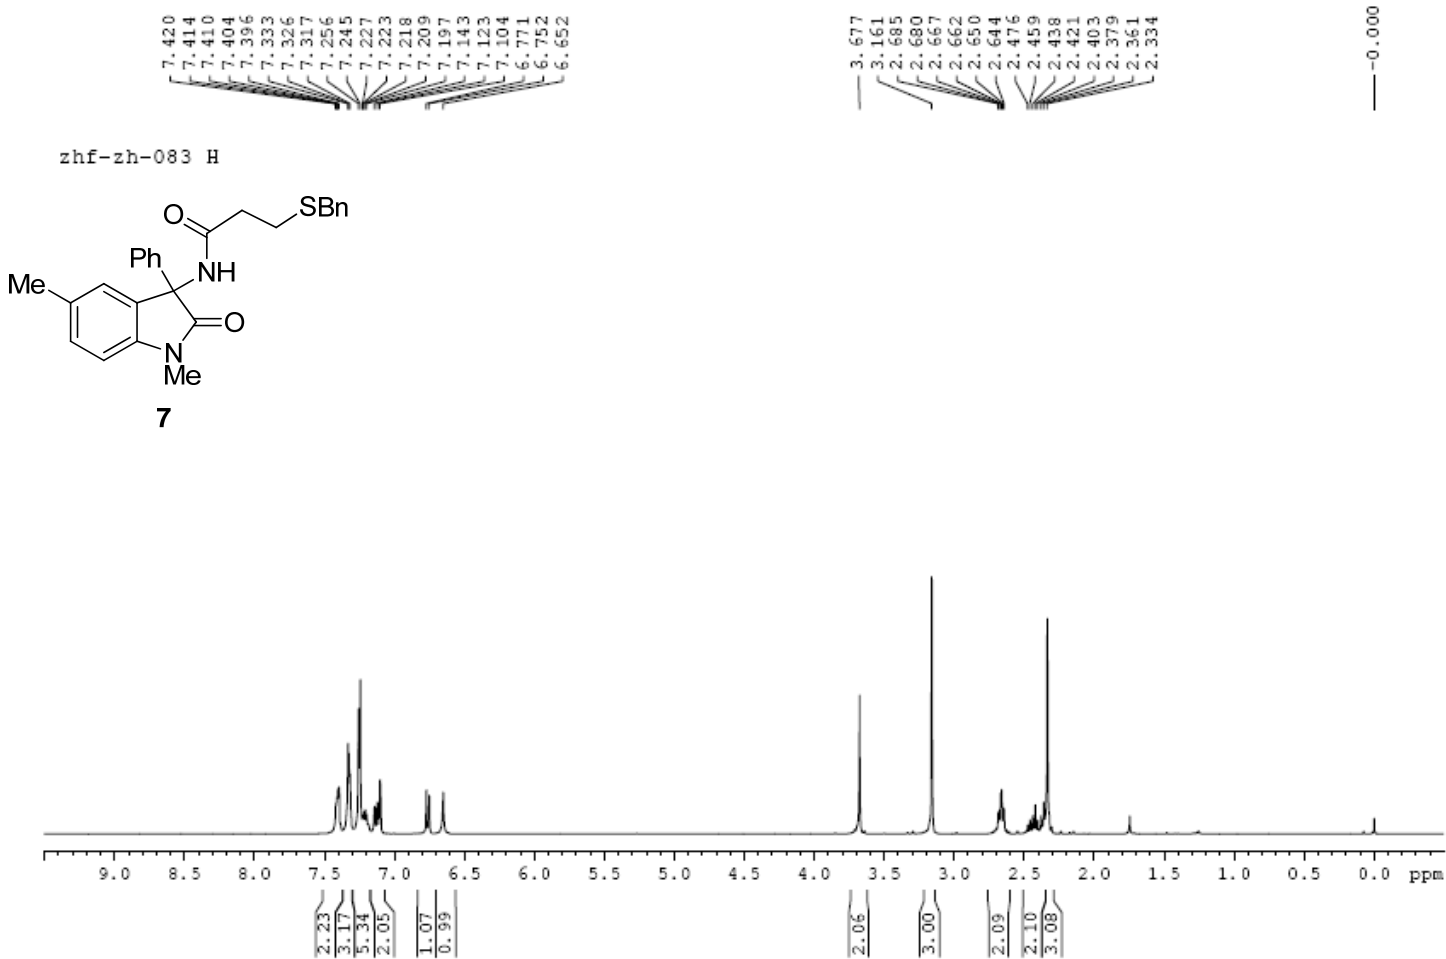

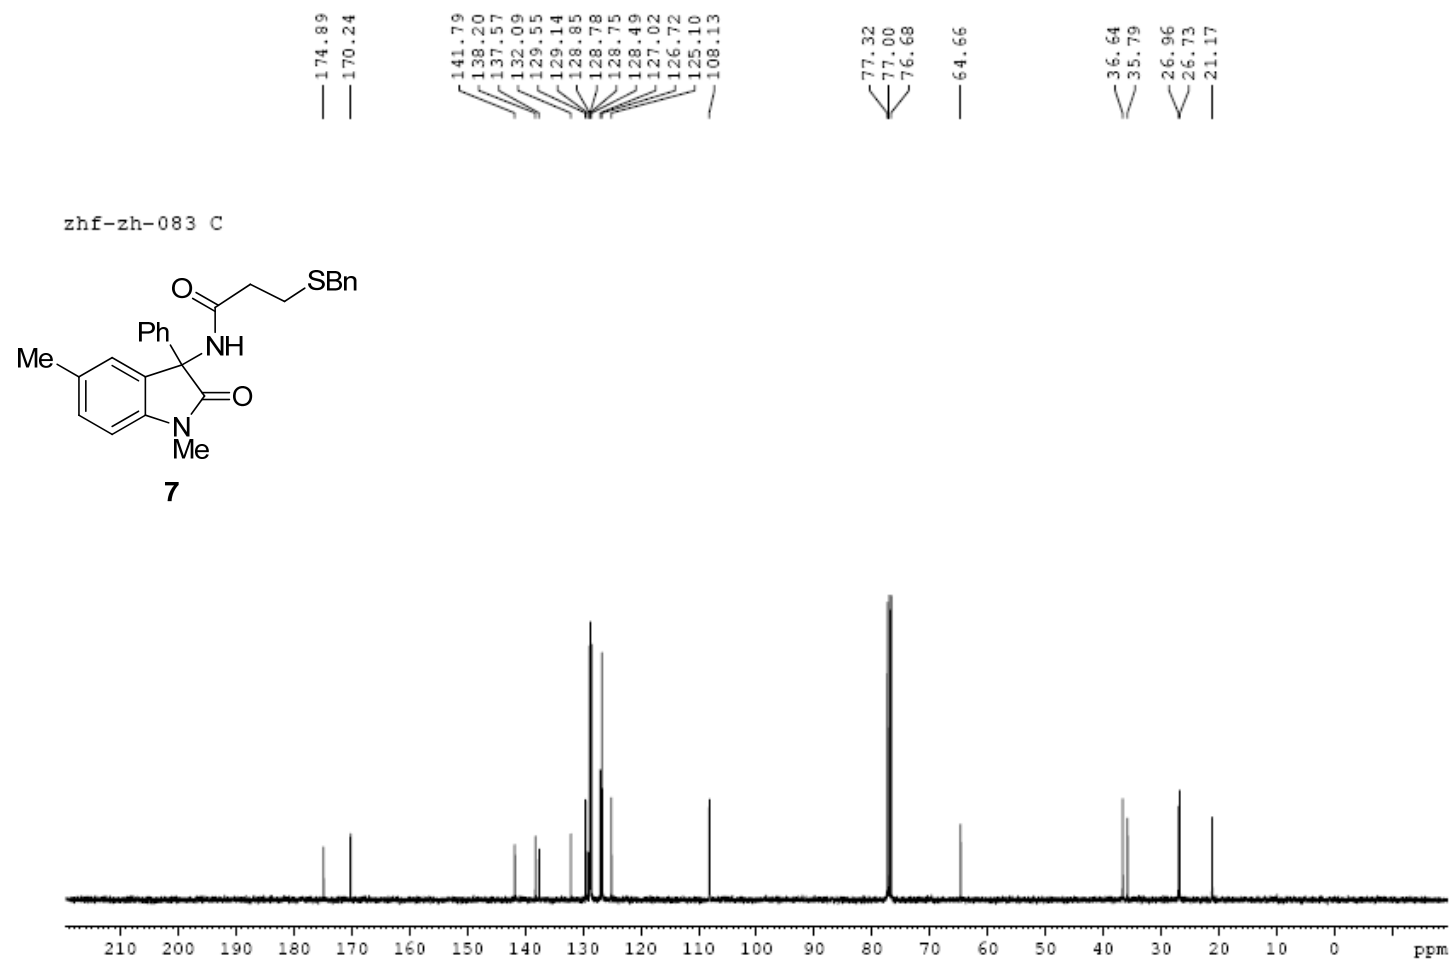

Supplement: c2ob25319d.pdf [file c2ob25319d.pdf]
